# Supplementary material for: Rhodium-catalysed direct C–H allylation of N-sulfonyl ketimines with allyl carbonates
Source: Royal Society of Chemistry journal article supplement (doi:10.1039/c4cc09899d), 2015-01-01

## Supplementary Information

# Rhodium-Catalysed Direct C-H Allylation of *N*-Sulfonyl Ketimines with Allyl Carbonates

Shu-Tao Mei, Nan-Jin Wang, Qin Ouyang\* and Ye Wei\*

*College of Pharmacy, Third Military Medical University, Chongqing 400038, China*

### Table of Contents

|                                                           |     |
|-----------------------------------------------------------|-----|
| <b>Materials and Methods</b> .....                        | S2  |
| <b>Preparation of Substrates</b> .....                    | S3  |
| <b>Rh-Catalysed Direct Aryl C-H Allylation</b> .....      | S5  |
| <b>Synthetic Transformations</b> .....                    | S17 |
| <b>Deuteration and Competition Experiments</b> .....      | S18 |
| <b>Computational Studies</b> .....                        | S19 |
| <b><sup>1</sup>H and <sup>13</sup>C NMR Spectra</b> ..... | S53 |

## Materials and Methods

**General.** All reactions dealing with air- and moisture-sensitive compounds were carried out in dry reaction vessels under a nitrogen atmosphere.  $^1\text{H}$  and  $^{13}\text{C}$  nuclear magnetic resonance (NMR) spectra were recorded on Agilent 600 MHz NMR spectrometer.  $^1\text{H}$  and  $^{13}\text{C}$  NMR spectra are reported in parts per million (ppm) downfield from an internal standard, tetramethylsilane (0 ppm) and  $\text{CHCl}_3$  (77.0 ppm), respectively. ESI high-resolution mass spectra (HRMS) were recorded on a Waters SYNAPT G2. Melting points were determined using a capillary melting point apparatus and are uncorrected.

**Materials.** Unless otherwise noted, materials were purchased from commercial suppliers and were used as received. Anhydrous DCM was distilled over  $\text{CaH}_2$  and stored under  $\text{N}_2$ .

## Preparation of Substrates

All *N*-sulfonyl ketimines<sup>1</sup> were synthesized according to the literature procedures, and the yields were not optimized. Allyl carbonates were synthesized from the corresponding allyl alcohols and methyl chloroformate.<sup>2</sup> Below are summarized characterization data for newly synthesized ketimines and allyl carbonates. <sup>1</sup>H and <sup>13</sup>C NMR spectra data for the rest of the ketimines and allyl carbonates showed good agreement with the literature data.

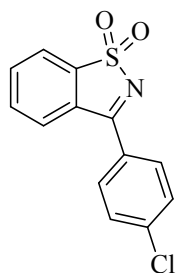

**3-(4-Chlorophenyl)benzo[d]isothiazole 1,1-dioxide (1f):** Brown solid; Mp = 210–211 °C; <sup>1</sup>H NMR (600 MHz, CDCl<sub>3</sub>): δ 8.03 (d, *J* = 7.4 Hz, 1H), 7.94 (d, *J* = 8.4 Hz, 2H), 7.87 (d, *J* = 7.6 Hz, 1H), 7.81 (t, *J* = 7.4 Hz, 1H), 7.76 (t, *J* = 7.5 Hz, 1H), 7.60 (d, *J* = 8.4 Hz, 2H); <sup>13</sup>C NMR (150 MHz CDCl<sub>3</sub>): δ 169.9, 141.1, 140.0, 133.7, 133.5, 130.8, 130.2, 129.6, 128.8, 126.2, 123.2; HRMS (ESI) Calcd for C<sub>13</sub>H<sub>8</sub>ClNO<sub>2</sub>S [M + Na]<sup>+</sup> 299.9862, found 299.9863.

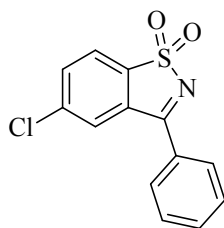

**5-Chloro-3-phenylbenzo[d]isothiazole 1,1-dioxide (1o):** Yellow solid; Mp = 156–157 °C; <sup>1</sup>H NMR (600 MHz, CDCl<sub>3</sub>): δ 7.96–7.94 (m, 3H), 7.85 (d, *J* = 1.0 Hz, 1H), 7.77–7.70 (m, 2H), 7.64 (t, *J* = 7.7 Hz, 2H); <sup>13</sup>C NMR (150 MHz CDCl<sub>3</sub>): δ 169.7, 140.2, 139.3, 133.7, 133.2, 132.4, 129.9, 129.4, 129.4, 126.7, 123.9; HRMS (ESI) Calcd for C<sub>13</sub>H<sub>8</sub>ClNO<sub>2</sub>S [M + H]<sup>+</sup> 299.9862, found 299.9863.

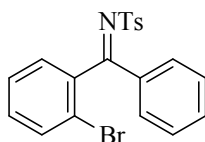

**N-((2-Bromophenyl)(phenyl)methylene)-4-methylbenzenesulfonamide (1u):** White solid; Mp = 93–95 °C; <sup>1</sup>H NMR (600 MHz, CDCl<sub>3</sub>): δ 7.85 (d, *J* = 8.1 Hz, 2H), 7.67 (d, *J* = 7.7 Hz, 2H), 7.61 (d, *J* = 8.1 Hz, 1H), 7.54 (t, *J* = 7.4 Hz, 1H), 7.48 (t, *J* = 7.5 Hz, 1H), 7.43–7.35 (m, 4H), 7.29 (d, *J* = 8.0 Hz, 2H), 2.43 (s, 3H); <sup>13</sup>C NMR (150 MHz CDCl<sub>3</sub>): δ 175.3, 143.8, 137.5, 136.8, 135.7, 133.8, 132.5, 131.0, 130.1, 129.4 (two signals are overlapped), 128.7, 127.7, 127.0, 120.1, 21.6;

1 (a) G. Yang and W. Zhang, *Angew. Chem., Int. Ed.*, 2013, **52**, 7540; (b) T. Nishimura, A. Noishiki, G. C. Tsui and T. Hayashi, *J. Am. Chem. Soc.*, 2012, **134**, 5056; (c) D. Hellwinkel and R. Karle, *Synthesis*, 1989, 394.

2 D. C. Vrieze, G. S. Hoge, P. Z. Hoerter, J. T. V. Haitsma and B. M. Sames, *Org. Lett.*, 2009, **11**, 3140.

**HRMS** (ESI) Calcd for C<sub>20</sub>H<sub>16</sub>BrNO<sub>2</sub>S [M + H]<sup>+</sup> 435.9983, found 435.9980.

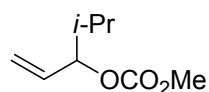

**Methyl (4-methylpent-1-en-3-yl) carbonate (2g)**: Yellow oil; <sup>1</sup>H NMR (600 MHz, CDCl<sub>3</sub>): 5.80–5.75 (m, 1H), 5.28 (d, *J* = 16.8 Hz, 1H), 5.25 (d, *J* = 10.2 Hz, 1H), 4.84 (t, *J* = 6.5 Hz, 1H), 3.77 (s, 3H), 1.94–1.89 (m, 1H), 0.93 (dd, *J* = 13.8, 7.2 Hz, 6H); <sup>13</sup>C NMR (150 MHz CDCl<sub>3</sub>): δ 155.4, 134.2, 118.3, 83.8, 54.6, 31.8, 17.9; **HRMS** (ESI) Calcd for C<sub>8</sub>H<sub>14</sub>O<sub>3</sub> [M + Na]<sup>+</sup> 181.0841, found 181.0841.

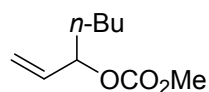

**Hept-1-en-3-yl methyl carbonate (2h)**: Yellow oil; <sup>1</sup>H NMR (600 MHz, CDCl<sub>3</sub>): δ 5.79–5.76 (m, 1H), 5.29 (d, *J* = 17.2 Hz, 1H), 5.20 (d, *J* = 10.5 Hz, 1H), 5.04 (m, 1H), 3.77 (s, 3H), 1.64–1.55 (m, 2H), 1.35–1.31 (m, 4H), 0.89 (t, *J* = 6.8 Hz, 3H); <sup>13</sup>C NMR (150 MHz CDCl<sub>3</sub>): δ 155.3, 136.0, 117.3, 79.2, 54.6, 33.9, 27.0, 22.4, 13.9; **HRMS** (ESI) Calcd for C<sub>9</sub>H<sub>16</sub>O<sub>3</sub> [M + H]<sup>+</sup> 195.0997, found 195.1000.

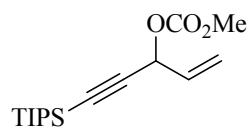

**Methyl (5-(triisopropylsilyl)pent-1-en-4-yn-3-yl) carbonate (2i)**: Colorless oil; <sup>1</sup>H NMR (600 MHz, CDCl<sub>3</sub>): δ 5.96–5.92 (m, 1H), 5.76 (d, *J* = 5.6 Hz, 1H), 5.62 (d, *J* = 16.8 Hz, 1H), 5.34 (d, *J* = 10.1 Hz, 1H), 3.80 (s, 3H), 1.07 (s, 18H), 1.05–0.96 (m, 3H); <sup>13</sup>C NMR (150 MHz CDCl<sub>3</sub>): δ 154.7, 132.5, 119.5, 101.2, 89.9, 68.7, 54.9, 18.5, 11.0; **HRMS** (ESI) Calcd for C<sub>16</sub>H<sub>28</sub>O<sub>3</sub>Si [M + H]<sup>+</sup> 319.1705, found 319.1699.

## Rh-Catalysed Direct Aryl C-H Alkylation

**Table S1.** Reaction optimization

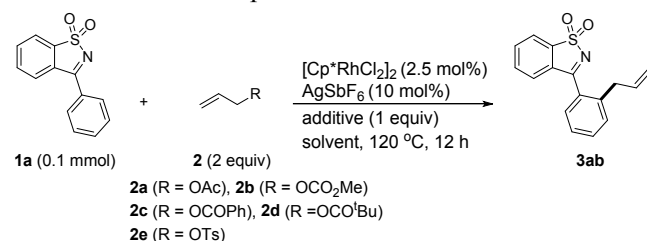

| Entry             | <b>2</b>  | Additive                                                      | Solvent <sup>[a]</sup> | Yield (%) <sup>b</sup> |
|-------------------|-----------|---------------------------------------------------------------|------------------------|------------------------|
| 1                 | <b>2a</b> | none                                                          | dioxane                | 41                     |
| 2                 | <b>2a</b> | K <sub>2</sub> CO <sub>3</sub>                                | dioxane                | 0                      |
| 3                 | <b>2a</b> | NaOAc                                                         | dioxane                | 0                      |
| 4                 | <b>2a</b> | HOAc                                                          | dioxane                | 30                     |
| 5                 | <b>2a</b> | EtCOOH                                                        | dioxane                | 54                     |
| 6                 | <b>2a</b> | PhCOOH                                                        | dioxane                | 51                     |
| 7                 | <b>2a</b> | <i>p</i> -MeO-C <sub>6</sub> H <sub>4</sub> COOH              | dioxane                | 40                     |
| 8                 | <b>2a</b> | <i>p</i> -NO <sub>2</sub> -C <sub>6</sub> H <sub>4</sub> COOH | dioxane                | 62                     |
| 9                 | <b>2a</b> | <i>p</i> -NO <sub>2</sub> -C <sub>6</sub> H <sub>4</sub> COOH | toluene                | 0                      |
| 10                | <b>2a</b> | <i>p</i> -NO <sub>2</sub> -C <sub>6</sub> H <sub>4</sub> COOH | PhCl                   | 74                     |
| 11                | <b>2a</b> | <i>p</i> -NO <sub>2</sub> -C <sub>6</sub> H <sub>4</sub> COOH | DCM                    | 60                     |
| 12                | <b>2a</b> | <i>p</i> -NO <sub>2</sub> -C <sub>6</sub> H <sub>4</sub> COOH | PhCl/DCM               | 85                     |
| 13                | <b>2b</b> | <i>p</i> -NO <sub>2</sub> -C <sub>6</sub> H <sub>4</sub> COOH | PhCl/DCM               | 89                     |
| 14                | <b>2c</b> | <i>p</i> -NO <sub>2</sub> -C <sub>6</sub> H <sub>4</sub> COOH | PhCl/DCM               | 55                     |
| 15                | <b>2d</b> | <i>p</i> -NO <sub>2</sub> -C <sub>6</sub> H <sub>4</sub> COOH | PhCl/DCM               | 31                     |
| 16                | <b>2e</b> | <i>p</i> -NO <sub>2</sub> -C <sub>6</sub> H <sub>4</sub> COOH | PhCl/DCM               | 30                     |
| 17 <sup>[c]</sup> | <b>2b</b> | <i>p</i> -NO <sub>2</sub> -C <sub>6</sub> H <sub>4</sub> COOH | PhCl/DCM               | 89                     |

<sup>a</sup>The ratio of mixed solvents is 1:9. <sup>b</sup>Isolated yields. <sup>c</sup>Reaction was run at 80 °C.

*N*-sulfonyl ketimine **1a**, a readily accessible derivative of saccharin, and allyl acetate **2a** were chosen as model substrates to optimize the reaction conditions (Table S1). Pleasingly, the reaction took place in the presence of [Cp<sup>\*</sup>RhCl<sub>2</sub>]<sub>2</sub> (2.5 mol%) and AgSbF<sub>6</sub> (10 mol%) at 120 °C in dioxane, affording the desirable **3ab** in 41% yield (entry 1). Next, we tested the effect of various additives on the reaction. Whereas the reaction did not occur at all with K<sub>2</sub>CO<sub>3</sub> or NaOAc as a base (entries 2 and 3), the addition of 1 equiv of acid, such as propionic acid, benzoic acid, 4-methoxybenzoic acid or 4-nitrobenzoic acid, improved the yield up to 62% (entries 5-8) while acetic acid gave a lower yield (entry 4). A screening of different solvents showed that mixed solvents of PhCl and DCM gave an 85% yield of **3ab** (entries 9-12). Among other allyl electrophiles with different leaving groups, allyl carbonate **2b** slightly improved the yield (entries 13-16). Note that, with **2b** as the allyl electrophile, the allylation reaction was also performed excellently at 80 °C (entry 17).

### A General Procedure

A 10 mL of Schlenk tube equipped with a stirrer bar was charged with ketimine (0.2 mmol), 4-nitrobenzoic acid (1 equiv), [Cp\*RhCl<sub>2</sub>]<sub>2</sub> (2.5 mol%), and AgSbF<sub>6</sub> (10 mol%) under air. Then, the Schlenk tube was quickly evacuated and refilled with N<sub>2</sub> for three times, followed by the addition of allyl carbonate (2 equiv), chlorobenzene (0.2 mL), and dichloromethane (1.8 mL). The Schlenk tube was sealed with a Teflon screwcap and the reaction mixture was stirred at 80 °C for 12 h. Upon cooling to room temperature, the reaction mixture was diluted with 10 mL of ethyl acetate, filtered through a pad of silica gel, followed by washing the pad of the silica gel with ethyl acetate (20 mL). Subsequently, the filtrate was concentrated under reduced pressure. The residue was purified by flash chromatography on silica gel to afford the allylated product.

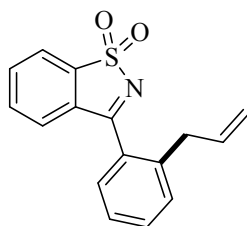

**3-(2-Allylphenyl)benzo[d]isothiazole 1,1-dioxide (3ab):** Following the general procedure; White solid (89% yield, eluent = petroleum ether/EtOAc (13:1)); Mp = 89–90 °C; **<sup>1</sup>H NMR** (600 MHz, CDCl<sub>3</sub>): δ 7.99 (d, *J* = 7.5 Hz, 1H), 7.77 (t, *J* = 7.5 Hz, 1H), 7.69 (t, *J* = 7.6 Hz, 1H), 7.55 (t, *J* = 7.6 Hz, 1H), 7.50–7.48 (m, 2H), 7.46 (d, *J* = 7.7 Hz, 1H), 7.42 (t, *J* = 7.5 Hz, 1H), 5.85 (ddt, *J* = 17.1, 13.2, 6.65 Hz, 1H), 4.96–4.91 (m, 2H), 3.62 (d, *J* = 6.5 Hz, 2H); **<sup>13</sup>C NMR** (150 MHz, CDCl<sub>3</sub>): δ 172.0, 140.1, 140.0, 136.2, 133.7, 133.4, 131.7, 131.7, 131.2, 129.1, 129.0, 126.4, 126.4, 122.7, 116.9, 37.4; **HRMS** (ESI) Calcd for C<sub>16</sub>H<sub>13</sub>NO<sub>2</sub>S [M + Na]<sup>+</sup> 306.0565, found 306.0565.

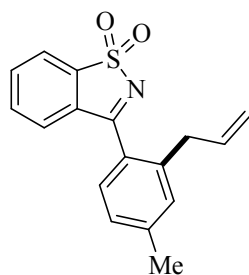

**3-(2-Allyl-4-methylphenyl)benzo[d]isothiazole 1,1-dioxide (3bb):** Following the general procedure; Yellow oil (97% yield, eluent = petroleum ether/EtOAc (13:1)); **<sup>1</sup>H NMR** (600 MHz, CDCl<sub>3</sub>): δ 7.97 (d, *J* = 7.4 Hz, 1H), 7.75 (t, *J* = 7.5 Hz, 1H), 7.67 (t, *J* = 7.5 Hz, 1H), 7.52 (d, *J* = 7.6 Hz, 1H), 7.40 (d, *J* = 7.8 Hz, 1H), 7.26 (s, 1H), 7.22 (d, *J* = 7.8 Hz, 1H), 5.84 (ddt, *J* = 17.1, 12.6, 6.6 Hz, 1H), 4.99–4.86 (m, 2H), 3.61 (d, *J* = 6.4 Hz, 2H), 2.44 (s, 3H); **<sup>13</sup>C NMR** (150 MHz, CDCl<sub>3</sub>): δ 171.9, 142.4, 140.2, 136.4, 133.6, 133.2, 132.0, 131.9, 129.3, 127.0, 126.5, 126.2, 122.6, 116.7 (two signals are overlapped), 37.4, 21.5; **HRMS** (ESI) Calcd for C<sub>17</sub>H<sub>15</sub>NO<sub>2</sub>S [M + Na]<sup>+</sup> 320.0721, found 320.0720.

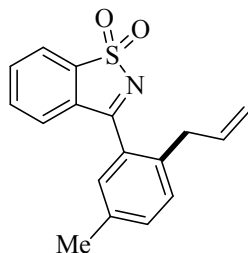

**3-(2-Allyl-5-methylphenyl)benzo[d]isothiazole 1,1-dioxide (3cb):** Following the general procedure but the reaction was run at 120 °C; Yellow oil (92% yield, eluent = petroleum ether/EtOAc (13:1)); **<sup>1</sup>H NMR** (600 MHz, CDCl<sub>3</sub>): δ 7.98 (d, *J* = 7.5 Hz, 1H), 7.76 (t, *J* = 7.5 Hz, 1H), 7.69 (t, *J* = 7.6 Hz, 1H), 7.50 (d, *J* = 7.6 Hz, 1H), 7.36–7.32 (m, 2H), 7.29 (s, 1H), 5.81 (ddt, *J* = 17.7, 12.6, 6.6 Hz, 1H), 4.93–4.90 (m, 2H), 3.55 (d, *J* = 6.5 Hz, 2H), 2.41 (s, 3H); **<sup>13</sup>C NMR** (150 MHz, CDCl<sub>3</sub>): δ 172.3, 140.1, 136.8, 136.4, 136.2, 133.7, 133.3, 132.5, 131.8, 131.1, 129.3, 129.0, 126.4, 122.6, 116.6, 37.0, 20.9; **HRMS** (ESI) Calcd for C<sub>17</sub>H<sub>15</sub>NO<sub>2</sub>S [M + Na]<sup>+</sup> 320.0721, found 320.0719.

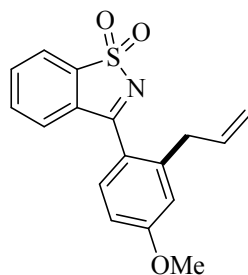

**3-(2-Allyl-4-methoxyphenyl)benzo[d]isothiazole 1,1-dioxide (3db):** Following the general procedure; Yellow solid (88% yield, eluent = petroleum ether/EtOAc (13:1)); Mp = 73–74 °C; **<sup>1</sup>H NMR** (600 MHz, CDCl<sub>3</sub>): δ 7.98 (d, *J* = 7.4 Hz, 1H), 7.74 (t, *J* = 7.5 Hz, 1H), 7.69 (t, *J* = 7.5 Hz, 1H), 7.58 (d, *J* = 7.6 Hz, 1H), 7.51 (d, *J* = 8.5 Hz, 1H), 6.98 (d, *J* = 2.4 Hz, 1H), 6.92 (dd, *J* = 8.5, 2.5 Hz, 1H), 5.86 (ddt, *J* = 17.7, 12.6, 6.6 Hz, 1H), 5.01–4.95 (m, 2H), 3.89 (s, 3H), 3.67 (d, *J* = 6.6 Hz, 2H); **<sup>13</sup>C NMR** (150 MHz, CDCl<sub>3</sub>): δ 171.1, 162.4, 143.2, 140.3, 136.2, 133.5, 133.1, 132.0, 131.5, 126.5, 122.6, 121.3, 117.0, 116.9, 111.6, 55.5, 37.6; **HRMS** (ESI) Calcd for C<sub>17</sub>H<sub>15</sub>NO<sub>3</sub>S [M + Na]<sup>+</sup> 336.0670, found 336.0668.

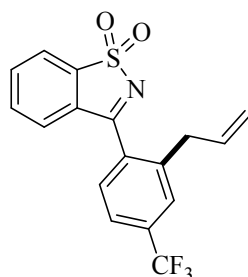

**3-(2-Allyl-4-(trifluoromethyl)phenyl)benzo[d]isothiazole 1,1-dioxide (3eb):** Following the general procedure; White solid (84% yield, eluent = petroleum ether/EtOAc (9:1)); Mp = 74–75 °C; **<sup>1</sup>H NMR** (600 MHz, CDCl<sub>3</sub>): δ 8.02 (d, *J* = 7.5 Hz, 1H), 7.81 (t, *J* = 7.5 Hz, 1H), 7.72–7.69 (m, 3H), 7.61 (d, *J* = 7.9 Hz, 1H), 7.42 (d, *J* = 7.6 Hz, 1H), 5.81 (ddt, *J* = 16.5, 12.6, 6.6 Hz, 1H), 4.99–4.96 (m, 2H), 3.64 (d, *J* = 6.4 Hz, 2H); **<sup>13</sup>C NMR** (150 MHz, CDCl<sub>3</sub>): δ 171.0, 141.1, 140.0,

134.9, 133.9, 133.8, 133.4 (q,  $^2J_{C-F} = 33$  Hz), 132.7, 131.2, 129.3, 127.8 (q,  $^3J_{C-F} = 4$  Hz), 126.0, 125.2 (q,  $^1J_{C-F} = 272$  Hz), 123.4 (q,  $^3J_{C-F} = 4$  Hz), 123.0, 118.0, 37.3; **HRMS** (ESI) Calcd for  $C_{17}H_{12}F_3NO_2S$   $[M + H]^+$  352.0619, found 352.0621.

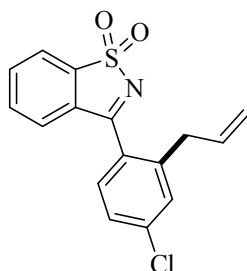

**3-(2-Allyl-4-chlorophenyl)benzo[d]isothiazole 1,1-dioxide (3fb)**: Following the general procedure but the reaction was run at 120 °C; White solid (65% yield, eluent = petroleum ether/EtOAc (13:1)); Mp = 87–88 °C;  **$^1H$  NMR** (600 MHz,  $CDCl_3$ ):  $\delta$  8.00 (d,  $J = 7.4$  Hz, 1H), 7.78 (t,  $J = 7.4$  Hz, 1H), 7.70 (t,  $J = 7.5$  Hz, 1H), 7.48–7.44 (m, 3H), 7.41 (d,  $J = 8.0$  Hz, 1H), 5.81 (ddt,  $J = 17.1, 13.8, 6.6$  Hz, 1H), 4.98 (d,  $J = 12.6$  Hz, 2H), 3.60 (d,  $J = 6.3$  Hz, 2H);  **$^{13}C$  NMR** (150 MHz,  $CDCl_3$ ):  $\delta$  171.0, 142.3, 140.1, 138.0, 135.3, 133.8, 133.6, 131.4, 131.3, 130.3, 127.5, 126.7, 126.1, 122.9, 117.7, 37.2; **HRMS** (ESI) Calcd for  $C_{16}H_{12}ClNO_2S$   $[M + Na]^+$  340.0175, found 340.0170.

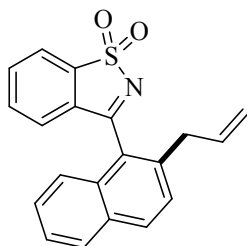

**3-(2-Allylnaphthalen-1-yl)benzo[d]isothiazole 1,1-dioxide (3gb)**: Following the general procedure and using 20 mol% of  $Cu(OAc)_2$  as an additive; Brown oil (83% yield, eluent = petroleum ether/EtOAc (13:1));  **$^1H$  NMR** (600 MHz,  $CDCl_3$ ):  $\delta$  8.04 (d,  $J = 7.6$  Hz, 1H), 8.01 (d,  $J = 8.5$  Hz, 1H), 7.92 (d,  $J = 8.2$  Hz, 1H), 7.75 (t,  $J = 7.5$  Hz, 1H), 7.56–7.50 (m, 3H), 7.47 (d,  $J = 8.4$  Hz, 1H), 7.45–7.41 (m, 1H), 7.04 (d,  $J = 7.6$  Hz, 1H), 5.83 (ddt,  $J = 16.5, 13.2, 6.6$  Hz, 1H), 4.98–4.94 (m, 2H), 3.56 (dd,  $J = 15.6, 7.2$  Hz, 1H), 3.44 (dd,  $J = 15.0, 5.4$  Hz, 1H);  **$^{13}C$  NMR** (150 MHz,  $CDCl_3$ ):  $\delta$  173.4, 139.6, 136.8, 135.5, 133.9, 133.7, 132.5, 132.0, 131.0, 130.7, 128.4, 127.8, 127.4, 126.3, 126.2, 125.5, 124.6, 122.6, 117.2, 38.0; **HRMS** (ESI) Calcd for  $C_{20}H_{15}NO_2S$   $[M + H]^+$  334.0902, found 334.0903.

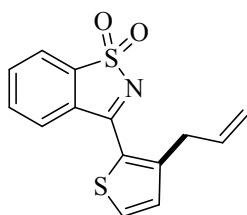

**3-(3-Allylthiophen-2-yl)benzo[d]isothiazole 1,1-dioxide (3hb)**: Following the general procedure but the reaction was run in the presence of  $AgSbF_6$  (40 mol%) and  $Cu(OAc)_2$  (50 mol%) at 120 °C;



Yellow solid (55% yield, eluent = petroleum ether/EtOAc (8:1)); Mp = 124–125 °C; **<sup>1</sup>H NMR** (600 MHz, CDCl<sub>3</sub>): δ 8.28–8.26 (m, 1H), 7.99–7.98 (m, 1H), 7.77–7.74 (m, 3H), 7.24 (d, *J* = 5.0 Hz, 1H), 6.02 (ddt, *J* = 16.8, 13.8, 6.6 Hz, 1H), 5.17–5.10 (m, 2H), 3.92 (d, *J* = 6.7 Hz, 2H); **<sup>13</sup>C NMR** (150 MHz, CDCl<sub>3</sub>): δ 163.5, 151.3, 140.4, 135.3, 133.5, 133.1, 132.8, 131.9, 131.5, 126.5, 125.6, 122.8, 117.0, 35.5; **HRMS** (ESI) Calcd for C<sub>14</sub>H<sub>11</sub>NO<sub>2</sub>S<sub>2</sub> [M + Na]<sup>+</sup> 312.0129, found 312.0125.

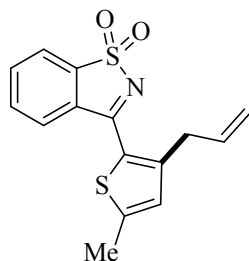

**3-(3-Allyl-5-methylthiophen-2-yl)benzo[d]isothiazole 1,1-dioxide (3ib)**: Following the general procedure but the reaction was run in the presence of AgSbF<sub>6</sub> (40 mol%) and Cu(OAc)<sub>2</sub> (50 mol%); Yellow solid (57% yield, eluent = petroleum ether/EtOAc (11:1)); Mp = 130–131 °C; **<sup>1</sup>H NMR** (600 MHz, CDCl<sub>3</sub>): δ 8.31–8.27 (m, 1H), 7.99–7.95 (m, 1H), 7.76–7.71 (m, 2H), 6.93 (s, 1H), 6.02 (ddt, *J* = 16.5, 13.2, 6.6 Hz, 1H), 5.16 (d, *J* = 17.0 Hz, 1H), 5.11 (d, *J* = 9.9 Hz, 1H), 3.89 (d, *J* = 6.8 Hz, 2H), 2.61 (s, 3H); **<sup>13</sup>C NMR** (150 MHz, CDCl<sub>3</sub>): δ 162.7, 152.8, 149.3, 140.5, 135.4, 133.3, 132.9, 131.8, 131.0, 126.4, 123.5, 122.7, 116.9, 35.9, 15.8; **HRMS** (ESI) Calcd for C<sub>15</sub>H<sub>13</sub>NO<sub>2</sub>S<sub>2</sub> [M + Na]<sup>+</sup> 326.0285, found 326.0280.

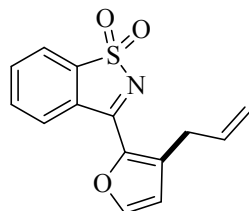

**3-(3-Allylfuran-2-yl)benzo[d]isothiazole 1,1-dioxide (3jb)**: Following the general procedure but the reaction was run in the presence of AgSbF<sub>6</sub> (40 mol%) and Cu(OAc)<sub>2</sub> (50 mol%) at 120 °C; Yellow solid (41% yield, eluent = petroleum ether/EtOAc (7:1)); Mp = 143–144 °C; **<sup>1</sup>H NMR** (600 MHz, CDCl<sub>3</sub>): δ 8.55–8.54 (m, 1H), 7.98–7.97 (m, 1H), 7.81 (s, 1H), 7.77–7.72 (m, 2H), 6.70 (s, 1H), 6.01 (ddt, *J* = 16.5, 13.2, 6.6 Hz, 1H), 5.22 (d, *J* = 16.8 Hz, 1H), 5.16 (d, *J* = 10.2 Hz, 1H), 3.87 (d, *J* = 6.7 Hz, 2H); **<sup>13</sup>C NMR** (150 MHz, CDCl<sub>3</sub>): δ 158.1, 148.2, 143.4, 140.3, 140.1, 134.0, 133.6, 133.1, 130.6, 127.9, 122.4, 117.4, 115.8, 31.4; **HRMS** (ESI) Calcd for C<sub>14</sub>H<sub>11</sub>NO<sub>3</sub>S [M + Na]<sup>+</sup> 296.0357, found 296.0353.

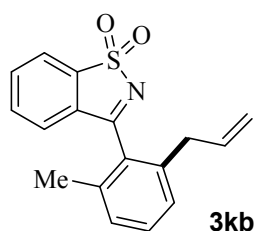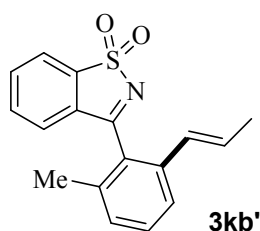

Following the general procedure and using 20 mol% of Cu(OAc)<sub>2</sub> as an additive. The reaction gave an inseparable mixture containing **3kb** and **3kb'** with a ratio of 2:1 determined by <sup>1</sup>H NMR. **3-(2-Allyl-6-methylphenyl)benzo[d]isothiazole 1,1-dioxide (3kb)**: 43% yield (eluent = petroleum ether/EtOAc (19:1)); <sup>1</sup>H NMR (600 MHz, CDCl<sub>3</sub>): δ 8.00 (d, *J* = 7.5 Hz, 1H), 7.77–7.34 (m, 1H), 7.65–7.61 (m, 1H), 7.46–7.37 (m, 1H), 7.25–7.18 (m, 3H), 5.73 (ddt, *J* = 16.8, 13.2, 6.6 Hz, 1H, 1H), 4.90–4.86 (m, 2H), 3.35 (dd, *J* = 15.6, 7.2 Hz, 1H), 3.24 (dd, *J* = 15.6, 6.0 Hz, 1H), 2.19 (s, 3H); <sup>13</sup>C NMR (150 MHz, CDCl<sub>3</sub>): δ 173.9, 139.6, 138.1, 135.7, 134.0, 133.6, 132.0, 130.5, 129.2, 128.6, 127.5, 125.7, 123.6, 122.7, 117.0, 37.7, 19.7; HRMS (ESI) Calcd for C<sub>17</sub>H<sub>15</sub>NO<sub>2</sub>S [M + Na]<sup>+</sup> 320.0721, found 320.0720.

**(E)-3-(2-methyl-6-(prop-1-en-1-yl)phenyl)benzo[d]isothiazole 1,1-dioxide (3kb')**: 22% yield (eluent = petroleum ether/EtOAc (19:1)); <sup>1</sup>H NMR (600 MHz, CDCl<sub>3</sub>): δ 8.00 (d, *J* = 7.5 Hz, 1H), 7.77–7.34 (m, 1H), 7.65–7.61 (m, 1H), 7.46–7.37 (m, 1H), 7.25–7.18 (m, 3H), 6.21–6.13 (m, 2H), 2.22 (s, 3H), 1.69 (d, *J* = 5.1 Hz, 3H); <sup>13</sup>C NMR (150 MHz, CDCl<sub>3</sub>): δ 174.0, 139.7, 138.1, 135.8, 133.9, 133.5, 131.9, 130.4, 129.2, 129.0, 127.5, 126.1, 123.6, 122.6, 117.0, 19.6, 18.6; HRMS (ESI) Calcd for C<sub>17</sub>H<sub>15</sub>NO<sub>2</sub>S [M + Na]<sup>+</sup> 320.0721, found 320.0720.

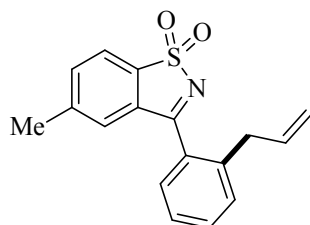

**3-(2-Allylphenyl)-5-methylbenzo[d]isothiazole 1,1-dioxide (3lb)**: Following the general procedure; Yellow solid (78% yield, eluent = petroleum ether/EtOAc (15:1)); Mp = 101–102 °C; <sup>1</sup>H NMR (600 MHz, CDCl<sub>3</sub>): δ 7.86 (d, *J* = 7.7 Hz, 1H), 7.56–7.54 (m, 2H), 7.49–7.38 (m, 3H), 7.24 (s, 1H), 5.83 (ddt, *J* = 17.1, 13.2, 6.6 Hz, 1H), 4.97–4.93 (m, 2H), 3.61 (d, *J* = 6.5 Hz, 2H), 2.46 (s, 3H); <sup>13</sup>C NMR (150 MHz, CDCl<sub>3</sub>): δ 172.1, 145.0, 139.9, 137.4, 136.2, 133.9, 132.3, 131.6, 131.1, 129.2, 129.0, 126.8, 126.3, 122.5, 116.8, 37.4, 21.7; HRMS (ESI) Calcd for C<sub>17</sub>H<sub>15</sub>NO<sub>2</sub>S [M + H]<sup>+</sup> 298.0902, found 298.0906.

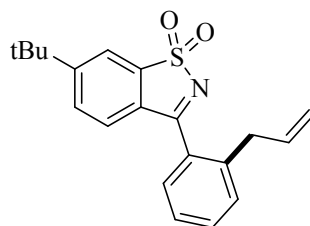

**3-(2-Allylphenyl)-6-(tert-butyl)benzo[d]isothiazole 1,1-dioxide (3mb)**: Following the general procedure but the reaction was run at 120 °C; Yellow solid (66% yield, eluent = petroleum ether/EtOAc (19:1)); Mp = 91–92 °C; <sup>1</sup>H NMR (600 MHz, CDCl<sub>3</sub>): δ 8.01 (s, 1H), 7.67 (d, *J* = 8.1 Hz, 1H), 7.53 (tf, *J* = 7.5 Hz, 1H), 7.49 (d, *J* = 7.6 Hz, 1H), 7.45 (d, *J* = 7.7 Hz, 1H), 7.42–7.39 (m, 2H), 5.85 (m, 1H), 5.00–4.89 (m, 2H), 3.63 (d, *J* = 6.2 Hz, 2H), 1.39 (s, 9H); <sup>13</sup>C NMR (150 MHz, CDCl<sub>3</sub>): δ 172.0, 158.4, 140.5, 140.0, 136.3, 131.6, 131.1, 130.8, 129.3, 129.3, 129.0, 126.3, 126.0, 119.9, 116.8, 37.4, 35.8, 31.0; HRMS (ESI) Calcd for C<sub>20</sub>H<sub>21</sub>NO<sub>2</sub>S [M + Na]<sup>+</sup> 362.1191, found 362.1185.

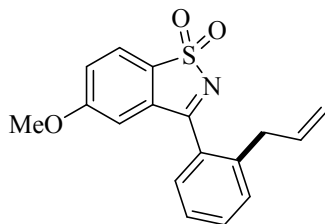

**3-(2-Allylphenyl)-5-methoxybenzo[d]isothiazole 1,1-dioxide (3nb):** Following the general procedure but the reaction was stirred at 120 °C; Yellow solid (72% yield, eluent = petroleum ether/EtOAc (13:1)); Mp = 87–88 °C;  $^1\text{H NMR}$  (600 MHz,  $\text{CDCl}_3$ ):  $\delta$  7.88 (d,  $J$  = 8.3 Hz, 1H), 7.54 (t,  $J$  = 7.5 Hz, 1H), 7.46 (t,  $J$  = 9.2 Hz, 2H), 7.41 (t,  $J$  = 7.5 Hz, 1H), 7.19 (d,  $J$  = 8.3 Hz, 1H), 6.88 (s, 1H), 5.84 (ddt,  $J$  = 16.5, 13.2, 6.6 Hz, 1H), 5.00–4.90 (m, 2H), 3.84 (d,  $J$  = 18.7 Hz, 3H), 3.61 (d,  $J$  = 6.3 Hz, 2H);  $^{13}\text{C NMR}$  (150 MHz,  $\text{CDCl}_3$ ):  $\delta$  171.5, 164.1, 139.9, 136.2, 134.3, 131.6, 131.5, 131.2, 129.1, 128.9, 126.4, 124.0, 117.7, 116.9, 112.1, 56.2, 37.4; **HRMS** (ESI) Calcd for  $\text{C}_{17}\text{H}_{15}\text{NO}_3\text{S}$   $[\text{M} + \text{H}]^+$  314.0851, found 314.0857.

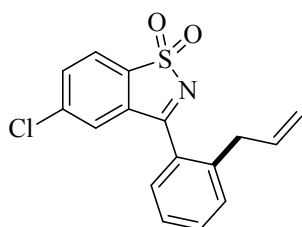

**3-(2-Allylphenyl)-5-chlorobenzo[d]isothiazole 1,1-dioxide (3ob):** Following the general procedure but the reaction was stirred at 120 °C; Yellow solid (81% yield, eluent = petroleum ether/EtOAc (19:1)); Mp = 110–111 °C;  $^1\text{H NMR}$  (600 MHz,  $\text{CDCl}_3$ ):  $\delta$  7.92 (d,  $J$  = 8.0 Hz, 1H), 7.73 (d,  $J$  = 8.0 Hz, 1H), 7.57 (t,  $J$  = 7.5 Hz, 1H), 7.49–7.42 (m, 4H), 5.87–5.80 (m, 1H), 4.97–4.91 (m, 2H), 3.62 (d,  $J$  = 6.0 Hz, 2H);  $^{13}\text{C NMR}$  (150 MHz,  $\text{CDCl}_3$ ):  $\delta$  170.7, 140.3, 140.2, 138.4, 136.1, 133.6, 133.3, 132.0, 131.4, 128.9, 128.5, 126.6, 126.4, 123.6, 117.0, 37.4; **HRMS** (ESI) Calcd for  $\text{C}_{16}\text{H}_{12}\text{ClNO}_2\text{S}$   $[\text{M} + \text{H}]^+$  318.0356, found 318.0353.

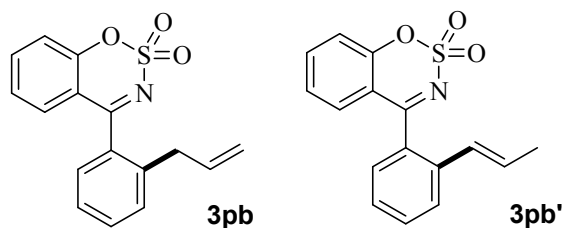

Following the general procedure and using 50 mol% of  $\text{Cu}(\text{OAc})_2$  as an additive. The reaction gave an inseparable mixture containing **3pb** and **3pb'** with a ratio of 1.45:1 determined by  $^1\text{H NMR}$ . **4-(2-Allylphenyl)benzo[e][1,2,3]oxathiazine 2,2-dioxide (3pb):** 51% yield (eluent = petroleum ether/EtOAc (39:1));  $^1\text{H NMR}$  (600 MHz,  $\text{CDCl}_3$ ):  $\delta$  7.74–7.69 (m, 1H), 7.52 (t,  $J$  = 7.6 Hz, 1H), 7.42–7.35 (m, 3H), 7.31–7.24 (m, 3H), 5.81 (ddt,  $J$  = 16.8, 13.2, 6.6 Hz, 1H), 4.96–4.92 (m, 2H), 3.47 (d,  $J$  = 6.0 Hz, 2H);  $^{13}\text{C NMR}$  (150 MHz,  $\text{CDCl}_3$ ):  $\delta$  177.6, 154.2, 139.3, 137.2, 133.1, 131.7, 131.4, 130.7, 129.5, 127.5, 126.6, 125.7, 119.0, 117.2, 117.1, 37.4; **HRMS** (ESI) Calcd for  $\text{C}_{16}\text{H}_{13}\text{NO}_3\text{S}$   $[\text{M} + \text{Na}]^+$  322.0514, found 322.0507.

**(E)-4-(2-(prop-1-en-1-yl)phenyl)benzo[e][1,2,3]oxathiazine 2,2-dioxide (3pb')**: 36% yield

(eluent = petroleum ether/EtOAc (39:1));  $^1\text{H NMR}$  (600 MHz,  $\text{CDCl}_3$ ):  $\delta$  7.74–7.69 (m, 1H), 7.61 (d,  $J = 8.0$  Hz, 1H), 7.42–7.35 (m, 3H), 7.31–7.24 (m, 3H), 6.27 (d,  $J = 15.6$  Hz, 1H), 6.19–6.13 (m, 1H), 1.72 (d,  $J = 6.6$  Hz, 3H);  $^{13}\text{C NMR}$  (150 MHz,  $\text{CDCl}_3$ ):  $\delta$  178.0, 154.0, 137.5, 137.1, 135.9, 131.5, 131.5, 130.7, 129.4, 127.5, 126.8, 126.3, 118.9, 117.2, 117.1, 18.7; **HRMS** (ESI) Calcd for  $\text{C}_{16}\text{H}_{13}\text{NO}_3\text{S}$   $[\text{M} + \text{Na}]^+$  322.0514, found 322.0507.

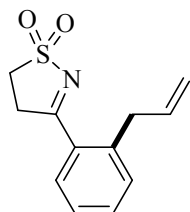

**3-(2-Allylphenyl)-4,5-dihydroisothiazole 1,1-dioxide (3qb)**: Following the general procedure, and using 50 mol% of  $\text{Cu}(\text{OAc})_2$  as an additive; Yellow solid (74% yield, eluent = petroleum ether/EtOAc (5:1)); Mp = 120–121 °C;  $^1\text{H NMR}$  (600 MHz,  $\text{CDCl}_3$ ):  $\delta$  7.58 (d,  $J = 7.8$  Hz, 1H), 7.50 (t,  $J = 7.5$  Hz, 1H), 7.40–7.33 (m, 2H), 6.01–5.91 (m, 1H), 5.06–5.00 (m, 2H), 3.82 (d,  $J = 6.4$  Hz, 2H), 3.62–3.59 (m, 2H), 3.36 (t,  $J = 7.2$  Hz, 2H);  $^{13}\text{C NMR}$  (150 MHz,  $\text{CDCl}_3$ ):  $\delta$  177.0, 141.9, 136.8, 132.8, 131.7, 130.6, 129.2, 126.7, 116.4, 43.7, 38.4, 36.6; **HRMS** (ESI) Calcd for  $\text{C}_{12}\text{H}_{13}\text{NO}_2\text{S}$   $[\text{M} + \text{Na}]^+$  258.0565, found 258.0561.

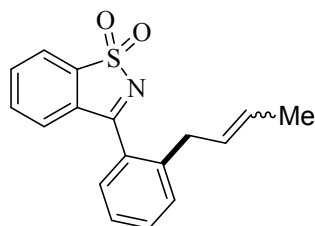

**(E)-3-(2-(But-2-en-1-yl)phenyl)benzo[d]isothiazole 1,1-dioxide and (Z)-3-(2-(but-2-en-1-yl)phenyl)benzo[d]isothiazole 1,1-dioxide (3af)**: Following the general procedure and the reaction was run in the presence of  $[\text{Cp}^*\text{RhCl}_2]_2$  (5 mol%),  $\text{AgSbF}_6$  (20 mol%) and  $\text{Cu}(\text{OAc})_2$  (20 mol%); Colorless oil (75% yield, eluent = petroleum ether/EtOAc (13:1));  $^1\text{H NMR}$  (600 MHz,  $\text{CDCl}_3$ ): **E isomer**:  $\delta$  8.00 (d,  $J = 7.5$  Hz, 1H), 7.78–7.76 (m, 1H), 7.70–7.68 (m, 1H), 7.54–7.44 (m, 4H), 7.40 (t,  $J = 7.2$  Hz, 1H), 5.52–5.31 (m, 2H), 3.58 (d,  $J = 7.0$  Hz, 2H), 1.55 (d,  $J = 6.6$  Hz, 3H). **Z isomer**:  $\delta$  8.00 (d,  $J = 7.5$  Hz, 1H), 7.78–7.76 (m, 1H), 7.70–7.68 (m, 1H), 7.54–7.44 (m, 4H), 7.40 (t,  $J = 7.2$  Hz, 1H), 5.52–5.31 (m, 2H), 3.52 (d,  $J = 5.5$  Hz, 2H), 1.40 (d,  $J = 5.0$  Hz, 3H);  $^{13}\text{C NMR}$  (150 MHz,  $\text{CDCl}_3$ ): **E isomer**:  $\delta$  172.3, 141.1, 140.1, 133.7, 133.4, 131.8, 131.7, 130.8, 129.0, 128.9, 127.8, 126.4, 126.2, 126.1, 122.7, 30.9, 12.9. **Z isomer**:  $\delta$  172.4, 141.0, 140.0, 133.6, 133.3, 132.0, 131.5, 131.0, 128.7, 128.6, 127.9, 126.3, 126.2, 126.1, 122.6, 36.5, 17.6; **HRMS** (ESI) Calcd for  $\text{C}_{17}\text{H}_{15}\text{NO}_2\text{S}$   $[\text{M} + \text{Na}]^+$  320.0721, found 320.0719.

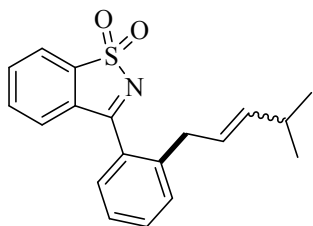

**(E)-3-(2-(4-Methylpent-2-en-1-yl)phenyl)benzo[d]isothiazole 1,1-dioxide and (Z)- 3-(2-(4-methylpent-2-en-1-yl)phenyl)benzo[d]isothiazole 1,1-dioxide (3ag):** Following the general procedure and the reaction was run in the presence of [Cp\**RhCl*<sub>2</sub>]<sub>2</sub> (5 mol%), AgSbF<sub>6</sub> (20 mol%) and Cu(OAc)<sub>2</sub> (20 mol%); Yellow solid (70% yield, eluent = petroleum ether/EtOAc (15:1)); Mp = 92–93 °C; <sup>1</sup>H NMR (600 MHz, CDCl<sub>3</sub>): **E isomer:** δ 7.98 (d, *J* = 7.2 Hz, 1H), 7.77–7.74 (m, 1H), 7.69–7.65 (m, 1H), 7.55–7.40 (m, 4H), 7.38 (t, *J* = 7.5 Hz, 1H), 5.36–5.18 (m, 2H), 3.58–3.55 (m, 2H), 2.57–2.53 (m, 1H), 0.87 (d, *J* = 6.6 Hz, 6H); **Z isomer:** δ 7.96 (d, *J* = 7.8 Hz, 1H), 7.77–7.74 (m, 1H), 7.69–7.65 (m, 1H), 7.55–7.40 (m, 4H), 7.38 (t, *J* = 7.5 Hz, 1H), 5.36–5.18 (m, 2H), 3.58–3.55 (m, 2H), 2.57–2.53 (m, 1H), 0.65 (d, *J* = 6.7 Hz, 6H); <sup>13</sup>C NMR (150 MHz, CDCl<sub>3</sub>): **E isomer:** δ 172.2, 141.3, 140.2, 139.5, 133.7, 133.4, 131.7, 131.5, 130.7, 128.9, 128.8, 126.5, 126.1, 124.4, 122.7, 31.0, 26.6, 22.9. **Z isomer:** δ 172.2, 141.3, 140.2, 140.0, 133.6, 133.3, 131.9, 131.7, 131.0, 129.2, 128.8, 126.3, 126.1, 124.7, 122.6, 36.3, 30.8, 22.0; **HRMS** (ESI) Calcd for C<sub>19</sub>H<sub>19</sub>NO<sub>2</sub>S [M + Na]<sup>+</sup> 348.1034, found 348.1031.

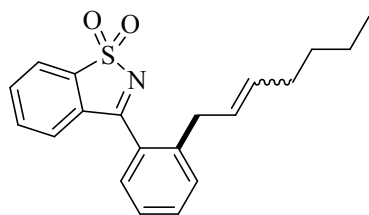

**(E)-3-(2-(Hept-2-en-1-yl)phenyl)benzo[d]isothiazole 1,1-dioxide and (Z)- 3-(2-(hept-2-en-1-yl)phenyl)benzo[d]isothiazole 1,1-dioxide (i):** Following the general procedure and the reaction was run in the presence of [Cp\**RhCl*<sub>2</sub>]<sub>2</sub> (5 mol%), AgSbF<sub>6</sub> (20 mol%) and Cu(OAc)<sub>2</sub> (20 mol%); Yellow oil (47% yield, eluent = petroleum ether/EtOAc (15:1)); <sup>1</sup>H NMR (600 MHz, CDCl<sub>3</sub>): **E isomer:** δ 8.00 (d, *J* = 7.4 Hz, 1H), 7.77 (t, *J* = 7.5 Hz, 1H), 7.68 (t, *J* = 7.6 Hz, 1H), 7.54–7.45 (m, 4H), 7.39 (t, *J* = 7.4 Hz, 1H), 5.46–5.38 (m, 2H), 3.58 (d, *J* = 5.5 Hz, 2H), 1.97–1.93 (m, 2H), 1.26 (m, 4H), 0.88–0.84 (m, 2H). **Z isomer:** δ 8.00 (d, *J* = 7.4 Hz, 1H), 7.77 (t, *J* = 7.5 Hz, 1H), 7.68 (t, *J* = 7.6 Hz, 1H), 7.53 (d, *J* = 7.4 Hz, 1H), 7.51–7.43 (m, 3H), 7.39 (t, *J* = 7.4 Hz, 1H), 5.38–5.35 (m, 2H), 3.58 (d, *J* = 5.5 Hz, 2H), 1.97–1.93 (m, 2H), 1.26 (m, 4H), 0.88–0.84 (m, 2H); <sup>13</sup>C NMR (150 MHz, CDCl<sub>3</sub>): **E isomer:** δ 172.2, 141.3, 140.2, 133.7, 133.4, 132.2, 131.8, 131.7, 130.7, 129.0, 128.9, 126.7, 126.4, 126.1, 122.7, 31.6, 31.1, 27.0, 22.3, 13.9. **Z isomer:** δ 172.2, 141.2, 140.2, 133.6, 133.3, 132.2, 131.8, 131.5, 131.0, 129.1, 128.8, 127.5, 126.3, 126.1, 122.6, 32.0, 31.2, 29.7, 22.1, 13.9; **HRMS** (ESI) Calcd for C<sub>20</sub>H<sub>21</sub>NO<sub>2</sub>S [M + Na]<sup>+</sup> 362.1191, found 362.1187.

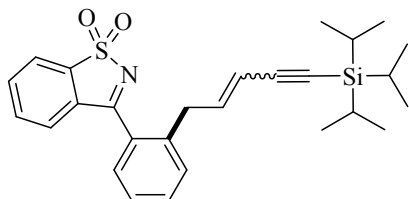

**(E)-3-(2-(5-(Triisopropylsilyl)pent-2-en-4-yn-1-yl)phenyl)benzo[d]isothiazole 1,1-dioxide and (Z)- 3-(2-(5-(triisopropylsilyl)pent-2-en-4-yn-1-yl)phenyl)benzo[d]isothiazole 1,1-dioxide (3ai):** Following the general procedure and using 20 mol% of Cu(OAc)<sub>2</sub> as an additive; Yellow solid (60% yield, eluent = petroleum ether/EtOAc (24:1)); Mp = 99–100 °C; <sup>1</sup>H NMR (600 MHz, CDCl<sub>3</sub>): **E isomer:** δ 8.02–7.99 (m, 1H), 7.79–7.74 (m, 1H), 7.72–7.65 (m, 1H), 7.59–7.47 (m, 4H), 7.46–7.41 (m, 1H), 6.17–6.09 (m, 1H), 5.61 (d, *J* = 10.8 Hz, 1H), 3.86 (d, *J* = 7.2 Hz, 1H), 1.08–1.02 (m, 21H). **Z isomer:** δ 8.02–7.98 (m, 1H), 7.77 (dd, *J* = 15.0, 7.4 Hz, 1H), 7.72–7.65 (m, 1H), 7.59–7.47 (m, 4H), 7.46–7.41 (m, 1H), 6.17–6.09 (m, 1H), 5.45 (d, *J* = 16.2 Hz, 1H), 3.66 (d, *J* = 6.6 Hz, 1H), 1.08–1.02 (m, 21H); <sup>13</sup>C NMR (150 MHz, CDCl<sub>3</sub>): **E isomer:** δ 171.8, 141.6, 139.8, 139.1, 133.7, 133.4, 131.9, 131.6, 131.3, 129.0, 128.8, 126.5, 126.4, 122.8, 112.2, 103.4, 95.9, 34.1, 18.6, 11.3. **Z isomer:** δ 171.8, 142.0, 140.2, 139.1, 133.7, 133.4, 131.8, 131.6, 131.4, 129.2, 128.8, 126.6, 126.3, 122.7, 112.4, 105.1, 90.5, 36.3, 18.5, 11.2; **HRMS** (ESI) Calcd for C<sub>27</sub>H<sub>33</sub>NO<sub>2</sub>SSi [M + Na]<sup>+</sup> 486.1899, found 486.1895.

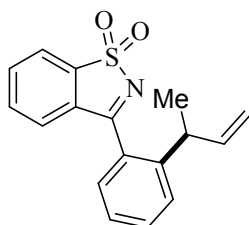

**3-(2-(But-3-en-2-yl)phenyl)benzo[d]isothiazole 1,1-dioxide (3aj):** Following the general procedure and the reaction was run in the presence of [Cp\*RhCl<sub>2</sub>]<sub>2</sub> (5 mol%), AgSbF<sub>6</sub> (20 mol%) and Cu(OAc)<sub>2</sub> (20 mol%); Yellow solid (28% yield, eluent = petroleum ether/EtOAc (13:1)); Mp = 77–78 °C; <sup>1</sup>H NMR (600 MHz, CDCl<sub>3</sub>): δ 8.00 (d, *J* = 7.5 Hz, 1H), 7.77 (t, *J* = 7.5 Hz, 1H), 7.68 (t, *J* = 7.6 Hz, 1H), 7.57 (t, *J* = 7.6 Hz, 1H), 7.51 (d, *J* = 7.9 Hz, 1H), 7.46–7.42 (m, 2H), 7.39 (t, *J* = 7.4 Hz, 1H), 5.93–5.86 (m, 1H), 4.96–4.94 (m, 2H), 3.96–3.88 (m, 1H), 1.37 (d, *J* = 6.9 Hz, 3H); <sup>13</sup>C NMR (150 MHz, CDCl<sub>3</sub>): δ 172.3, 145.2, 141.9, 140.1, 133.7, 133.4, 132.0, 131.6, 128.7, 128.6, 128.2, 126.4, 126.1, 122.7, 114.3, 38.7, 20.8; **HRMS** (ESI) Calcd for C<sub>17</sub>H<sub>15</sub>NO<sub>2</sub>S [M + Na]<sup>+</sup> 320.0721, found 320.0715.

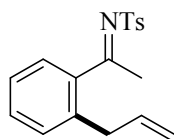

**N-(1-(2-Allylphenyl)ethylidene)-4-methylbenzenesulfonamide (3rb):** Following the general procedure and using 50 mol% of Cu(OAc)<sub>2</sub> as an additive; Yellow solid (32% yield, eluent = petroleum ether/EtOAc (79:1)); Mp = 79–80 °C; <sup>1</sup>H NMR (600 MHz, CDCl<sub>3</sub>): δ 7.88 (d, *J* = 8.2 Hz, 2H), 7.37–7.30 (m, 4H), 7.27–7.25 (m, 1H), 7.23 (d, *J* = 7.7 Hz, 1H), 5.80 (ddt, *J* = 16.8, 12.6, 6.6 Hz, 1H), 4.99–4.93 (m, 2H), 3.47 (d, *J* = 6.3 Hz, 2H), 2.91 (s, 3H), 2.43 (s, 3H); <sup>13</sup>C NMR (150 MHz, CDCl<sub>3</sub>): δ 184.2, 143.7, 139.7, 138.2, 137.7, 136.9, 130.9, 130.5, 129.4, 127.7, 127.2, 126.4, 116.2, 37.4, 25.5, 21.6; **HRMS** (ESI) Calcd for C<sub>18</sub>H<sub>19</sub>NO<sub>2</sub>S [M + Na]<sup>+</sup> 336.1034, found 336.1028.

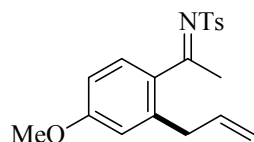

***N*-(1-(2-Allyl-4-methoxyphenyl)ethylidene)-4-methylbenzenesulfonamide (3sb)**: Following the general procedure and using 50 mol% of Cu(OAc)<sub>2</sub> as an additive; Yellow oil (50% yield, eluent = petroleum ether/EtOAc (15:1)); **<sup>1</sup>H NMR** (600 MHz, CDCl<sub>3</sub>): δ 7.88 (d, *J* = 8.1 Hz, 2H), 7.45 (d, *J* = 8.6 Hz, 1H), 7.31 (d, *J* = 8.0 Hz, 2H), 6.78–6.74 (m, 2H), 5.75 (ddt, *J* = 16.8, 12.6, 6.6 Hz, 1H), 4.96–4.90 (m, 2H), 3.81 (s, 3H), 3.49 (d, *J* = 6.3 Hz, 2H), 2.91 (s, 3H), 2.43 (s, 3H); **<sup>13</sup>C NMR** (150 MHz, CDCl<sub>3</sub>): δ 182.5, 161.6, 143.4, 141.5, 138.5, 136.9, 131.5, 130.8, 129.4, 127.1, 116.7, 116.0, 111.4, 55.3, 38.1, 24.9, 21.5; **HRMS** (ESI) Calcd for C<sub>19</sub>H<sub>21</sub>NO<sub>3</sub>S [M + Na]<sup>+</sup> 366.1140, found 366.1137.

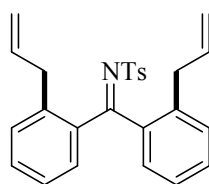

***N*-(Bis(2-allylphenyl)methylene)-4-methylbenzenesulfonamide (3tb)**: Following the general procedure and using 20 mol% of Cu(OAc)<sub>2</sub> as an additive in the presence of 6 equiv of **2b**; White solid (80% yield, eluent = petroleum ether/EtOAc (39:1)); Mp = 80–81 °C; **<sup>1</sup>H NMR** (600 MHz, CDCl<sub>3</sub>): δ 7.80 (d, *J* = 8.1 Hz, 2H), 7.46–7.31 (m, 4H), 7.28 (d, *J* = 7.8 Hz, 4H), 7.14–7.04 (m, 2H), 5.78–5.67 (m, 2H), 4.93–4.83 (m, 4H), 3.60 (s, 2H), 3.10 (d, *J* = 75.2 Hz, 2H), 2.43 (s, 3H); **<sup>13</sup>C NMR** (150 MHz, CDCl<sub>3</sub>): δ 180.1, 143.5, 141.4, 138.1, 137.1, 137.0, 136.8, 136.2, 135.8, 133.2, 132.1, 131.7, 130.2, 129.4, 129.3, 128.7, 127.5, 126.2, 125.7, 116.6, 115.6, 38.3, 37.7, 21.6; **HRMS** (ESI) Calcd for C<sub>26</sub>H<sub>25</sub>NO<sub>2</sub>S [M + Na]<sup>+</sup> 438.1504, found 438.1501.

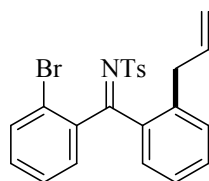

***N*-((2-Allylphenyl)(2-bromophenyl)methylene)-4-methylbenzenesulfonamide (3ub)**: Following the general procedure; Yellow oil (67% yield, eluent = petroleum ether/EtOAc (39:1)); **<sup>1</sup>H NMR** (600 MHz, CDCl<sub>3</sub>): δ 7.84 (d, *J* = 8.2 Hz, 2H), 7.62–7.53 (m, 2H), 7.49 (t, *J* = 7.3 Hz, 1H), 7.42–7.34 (m, 2H), 7.29 (d, *J* = 7.8 Hz, 3H), 7.13 (t, *J* = 7.3 Hz, 1H), 7.07 (d, *J* = 7.8 Hz, 1H), 6.9 (m, 1H), 4.92–4.86 (m, 2H), 3.61–3.56 (m, 2H), 2.43 (s, 3H); **<sup>13</sup>C NMR** (150 MHz, CDCl<sub>3</sub>): δ 176.8, 143.8, 142.0, 138.3, 137.6, 137.1, 135.2, 132.7, 132.3, 132.1, 131.6, 131.2, 130.1, 129.4, 127.6, 126.9, 126.0, 120.1, 115.6, 38.3, 21.6; **HRMS** (ESI) Calcd for C<sub>23</sub>H<sub>20</sub>BrNO<sub>2</sub>S [M + Na]<sup>+</sup> 476.0296, found 476.0295.

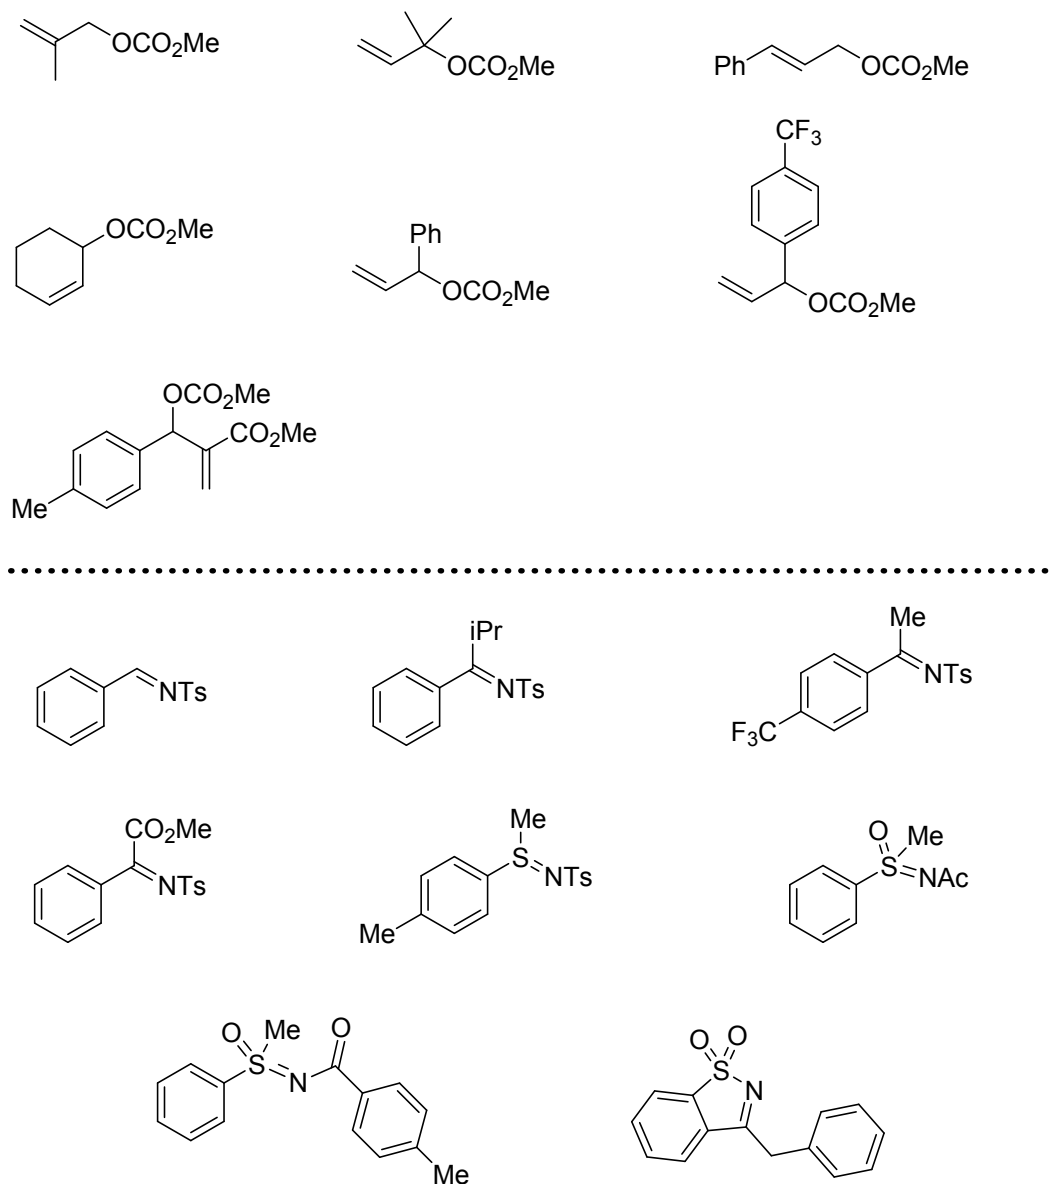

**Scheme S1.** Unreactive substrates with respect to the allyl carbonates and aromatics.

We tried to explore the substrate scope with respect to the allyl carbonates and aromatics, however, no desired products were obtained after considerable experimentation.



## Synthetic Transformations

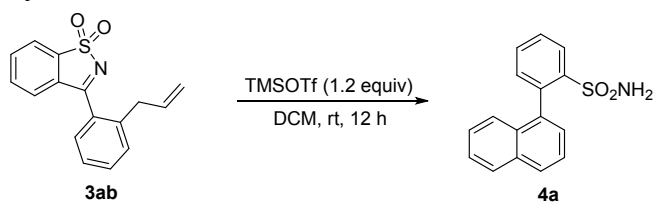

To a solution of **3ab** (0.035 mmol, 10 mg) in 1 ml of dry dichloromethane was added trimethylsilyl trifluoromethanesulfonate (1.2 equiv, 0.042 mmol, 8  $\mu$ l). The mixture was stirred at room temperature for 12 h and then concentrated under reduced pressure. The residue was purified by flash chromatography on silica gel to afford the product **4a**. Yellow solid (90% yield, eluent = petroleum ether/EtOAc (17:3)); Mp = 131-132 °C;  $^1\text{H NMR}$  (600 MHz,  $\text{CDCl}_3$ ):  $\delta$  8.26 (d,  $J = 7.9$  Hz, 1H), 7.96–7.90 (m, 2H), 7.66 (t,  $J = 7.4$  Hz, 1H), 7.63–7.57 (m, 3H), 7.51 (t,  $J = 7.4$  Hz, 1H), 7.42–7.39 (m, 2H), 7.35 (d,  $J = 8.4$  Hz, 1H), 3.96 (s, 2H);  $^{13}\text{C NMR}$  (150 MHz,  $\text{CDCl}_3$ ):  $\delta$  141.6, 138.1, 135.5, 133.4, 133.0, 132.1, 131.8, 129.0, 128.5, 128.5, 128.2, 127.9, 126.7, 126.2, 125.6, 125.1; **HRMS** (ESI) Calcd for  $\text{C}_{16}\text{H}_{13}\text{NO}_2\text{S}$  [ $\text{M} + \text{Na}$ ] $^+$  306.0565, found 306.0560.

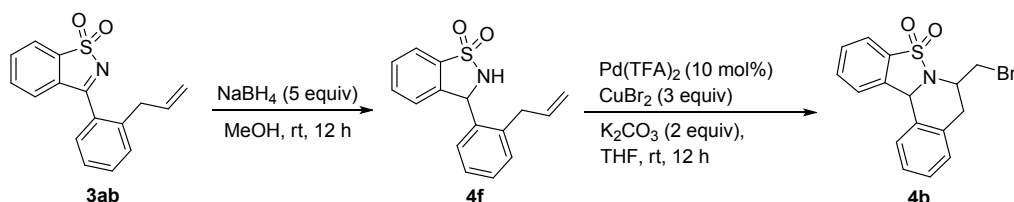

$\text{NaBH}_4$  (5 equiv) was added portionwise to a solution of **3ab** (0.035 mmol, 10 mg) in MeOH (1 mL) at 0 °C. The resulting suspension was stirred for 12 h at room temperature and then concentrated under reduced pressure. The residue was purified by flash chromatography on silica gel to afford **4f** in quantitative yield. Yellow solid (eluent = petroleum ether/EtOAc (13:1)); Mp = 152-153 °C;  $^1\text{H NMR}$  (600 MHz,  $\text{CDCl}_3$ ):  $\delta$  7.85–7.84 (m, 1H), 7.57–7.55 (m, 2H), 7.32 (d,  $J = 7.2$  Hz, 1H), 7.26 (d,  $J = 7.8$  Hz, 1H), 7.22 (t,  $J = 7.8$  Hz, 1H), 7.10–7.07 (m, 2H), 6.09–6.03 (m, 1H), 6.01 (d,  $J = 4.2$  Hz, 1H), 5.14 (d,  $J = 10.2$  Hz, 1H), 5.00 (d,  $J = 16.8$  Hz, 1H), 4.78 (s, 1H), 3.63–3.55 (m, 2H);  $^{13}\text{C NMR}$  (150 MHz,  $\text{CDCl}_3$ ):  $\delta$  140.3, 138.4, 137.2, 136.6, 135.7, 133.3, 130.8, 129.4, 129.3, 128.4, 127.8, 125.4, 121.2, 116.6, 57.4, 37.0; **HRMS** (ESI) Calcd for  $\text{C}_{16}\text{H}_{14}\text{BrNO}_2\text{S}$  [ $\text{M} + \text{Na}$ ] $^+$  308.0721, found 308.0720.

To a solution of the **4f** (0.035 mmol, 10 mg) in dry tetrahydrofuran (1 mL) was added  $\text{K}_2\text{CO}_3$  (2 equiv, 0.07 mmol, 9.6 mg),  $\text{CuBr}_2$  (3 equiv, 0.1 mmol, 22.3 mg) and  $\text{Pd(TFA)}_2$  (10 mol%, 1.5 mg) at 0 °C. Then the mixture was stirred at rt for 12 h. Volatile materials were removed and the residue was purified by flash chromatography on silica gel to afford the final product **4b**. Yellow solid (79% yield, eluent = petroleum ether/EtOAc (13:1)); Mp = 159-160 °C;  $^1\text{H NMR}$  (600 MHz,  $\text{CDCl}_3$ ):  $\delta$  7.87 (d,  $J = 7.8$  Hz, 1H), 7.70 (t,  $J = 7.6$  Hz, 1H), 7.62–7.58 (m, 2H), 7.33–7.27 (m, 3H), 7.19 (d,  $J = 7.5$  Hz, 1H), 5.71 (s, 1H), 4.34–4.26 (m, 1H), 3.72 (dd,  $J = 10.5, 4.1$  Hz, 1H), 3.62–3.59 (m, 1H), 3.21 (dfd,  $J = 15.3, 4.9$  Hz, 1H), 3.07 (dd,  $J = 15.3, 7.7$  Hz, 1H);  $^{13}\text{C NMR}$  (150 MHz,  $\text{CDCl}_3$ ):  $\delta$  135.7, 135.4, 133.6, 133.3, 132.7, 129.6, 128.9, 128.6, 127.2, 125.7, 124.8, 121.8, 58.7, 51.0, 35.4, 32.0; **HRMS** (ESI) Calcd for  $\text{C}_{16}\text{H}_{14}\text{BrNO}_2\text{S}$  [ $\text{M} + \text{Na}$ ] $^+$  385.9826, found 385.9828.

## Deuteration and Competition Experiments

### (A) H-D exchange experiment (Scheme S2a)

The reaction between **1a** (0.2 mmol) and D<sub>2</sub>O (10 equiv) was performed in the presence of [Cp\*RhCl<sub>2</sub>]<sub>2</sub> (2.5 mol%), AgSbF<sub>6</sub> (10 mol%), and 4-nitrobenzoic acid (1 equiv) with PhCl/DCM as the solvent at 80 °C for 1 h. After standard workup and purification, a mixture of **1a** and D-**1a** was obtained. <sup>1</sup>H NMR analysis of the mixture showed 11% D was incorporated into the two *ortho* positions of the ketimine aryl ring (see the attached spectrum).

### (B) Intermolecular Competition (Scheme S2b)

A mixture of **1a** and **1a-d<sub>5</sub>** (0.2 mmol each) was subjected to the standard reaction conditions for 12 h. After standard workup and purification, a mixture of **3ab** and **3ab-d<sub>4</sub>** was obtained. <sup>1</sup>H NMR analysis of the mixture showed a large value of  $k_H/k_D = 3.7$  (see the attached spectrum).

### (C) Intermolecular Competition (Scheme S2c)

A mixture of **1d** and **1e** (0.2 mmol each) was subjected to the standard reaction conditions for 12 h. GC results showed a ratio of 95:5 of **3db** and **3eb**.

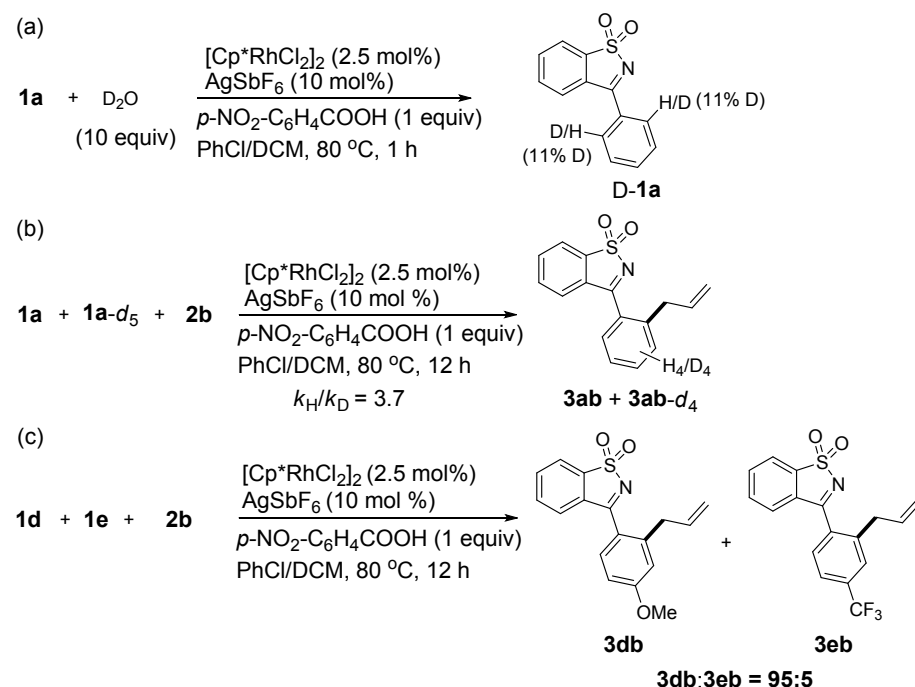

**Scheme S2.** Deuteration and competition experiments.

The result of H/D exchange experiment between **1a** and 10 equiv of deuterium oxide showed that 11% D was introduced into the two *ortho* positions of the ketimine aryl ring (Scheme S2a). An intermolecular competition reaction between **1a** and **1a-d<sub>5</sub>** was performed, giving a primary kinetic isotope effect of 3.7 (Scheme S2b). These results suggested that the reaction involved a Rh-mediated reversible C-H activation process, which was consistent with our previous observation in the Rh-catalysed aryl C-H olefination. Furthermore, an intermolecular competition reaction of **1d** and **1e** with **2b** was also carried out (Scheme S2c). GC analysis of the resulting mixture revealed that **3db** was the major product, indicating that the more electron-rich ketimine is significantly kinetically favored.

## Computational Studies

### Computational method

All calculations were performed with the Gaussian 09 program suite.<sup>3</sup> Density functional theory (DFT) method was used, employing B3LYP hybrid functional.<sup>4</sup> Geometry optimization was done using a combined basis set where LANL2DZ<sup>5</sup> was used for Rh atom and 6-31+G(d) for the rest. Frequency calculations were carried out at the same level of theory for thermochemical analysis and to confirm that the number of imaginary frequencies of intermediate and transition states was 0 and 1, respectively. For transition states, intrinsic reaction coordinate analysis (IRC)<sup>6</sup> was done to verify that they connect the right reactants and products on the potential energy surface.

To take solvent effects into account, solution-phase single-point calculations were performed on the gas-phase geometries.<sup>7</sup> The M06-L functional was used, and this method has been frequently employed in describing the energetics of Rh-catalysed reactions.<sup>8</sup> In the solution-phase single-point calculations, the Lanl2DZ ECP with an additional polarization function Rh( $\zeta(f)=1.350$ ) was used for the Rh atom,<sup>9</sup> and 6-311++G(d,p) was used for C, H, O, N, and S atoms. The self-consistent reaction field (SCRF) with CPCM solvation model was used for all these calculations.<sup>10</sup> DMC was used as solvent, because this reaction also can be carried out in the DMC with 40% yield. Solution-phase single-point energies corrected by the gas-phase Gibbs free energy corrections were used to describe all the reaction energetics. All of these energies correspond to the reference state of 1 mol L<sup>-1</sup>, 298 K.

---

3 M. J. Frisch, G. W. Trucks, H. B. Schlegel, G. E. Scuseria, et al., Revision C. 01 ed., Gaussian, Inc., Wallingford, CT, USA, 2010.

4 (a) A. D. Becke, *J. Chem. Phys.*, 1993, **98**, 5648; (b) C. Lee, W. Yang, R. G. Parr and *Phys. Rev. B*, 1988, **37**, 785.

5 P. J. Hay and W. R. Wadt, *J. Chem. Phys.*, 1985, **82**, 299.

6 K. Fukui, *Acc. Chem. Res.*, 1981, **14**, 363.

7 J. M. Um, D. A. DiRocco, E. L. Noey, T. Rovis and K. N. Houk, *J. Am. Chem. Soc.*, 2011, **133**, 11249.

8 (a) D. G. Gusev, *Organometallics*, 2013, **32**, 4239; (b) H. Z. Yu, C. Wang, Y. M. Yang and Z. M. Dang, *Chem.-Eur. J.* 2014, **20**, 3839.

9 A. W. Ehlers, M. Böhme, S. Dapprich, A. Gobbi, A. Höllwarth, V. Jonas, K. F. Köhler, R. Stegmann, A. Veldkamp and G. Frenking, *Chem. Phys. Lett.*, 1993, **208**, 111.

10 M. Cossi, N. Rega, G. Scalmani and V. Barone, *J. Comput. Chem.*, 2003, **24**, 669.

## Computational Results and Discuss

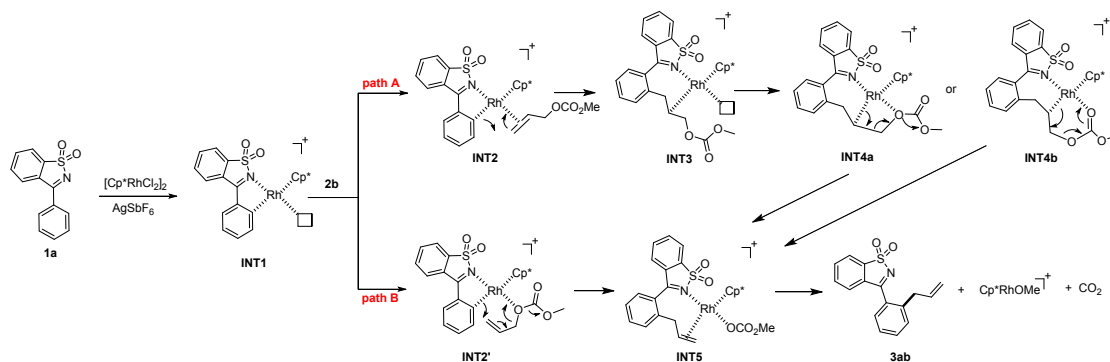

Scheme S3. Two Plausible Pathways.

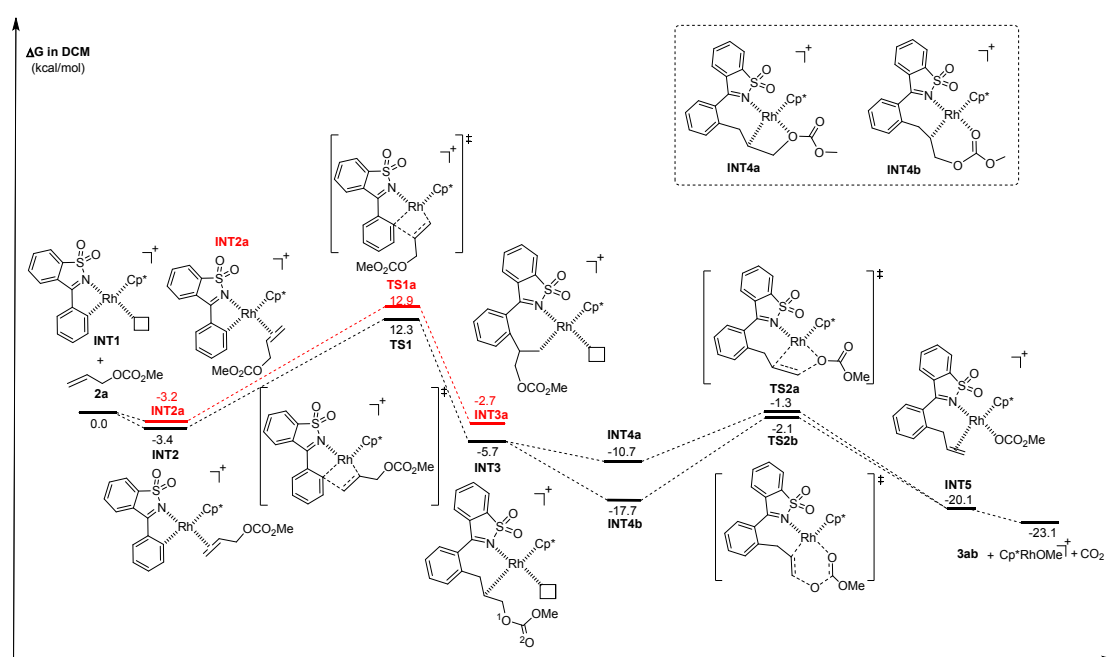

Scheme S4. Energy profile of olefin insertion and allylarene formation with relative Gibbs free energies [kcal/mol].

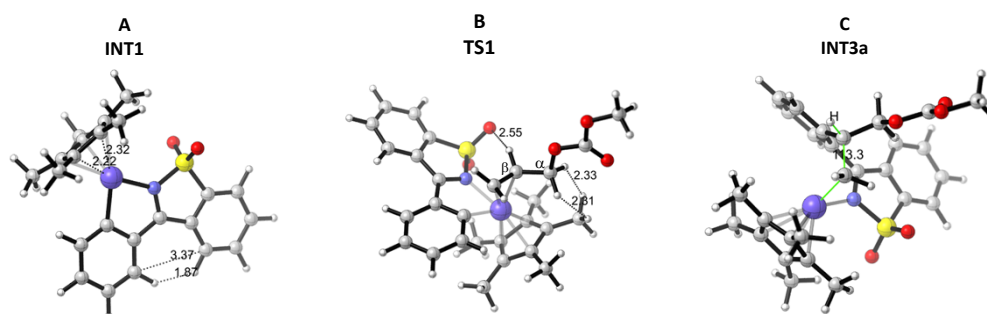

Scheme S5. Optimized structure of intermediates INT1 (A), TS1 (B), and INT3a (C). The bond distances of the optimized structures are in angstroms.

On the basis of the literatures and our experiments, a coordinatively unsaturated cationic species (**INT1**) was postulated to be formed by the reaction of **1a** and  $[\text{Cp}^*\text{RhCl}_2]_2$  through C-H cleavage. (Scheme S3).

It was interesting to note that the bond length between the rhodium metal center and carbon atom in a pentamethylcyclopentadienyl ( $\text{Cp}^*$ ) ligand is not equivalent depending on the relative position to 3-phenylbenzo[d]isothiazole 1,1-dioxide (**1a**). For example, the Rh-C<sub>a</sub> distance (2.32 Å) was calculated to be longer than that of Rh-C<sub>b</sub> (2.22 Å), presumably due to the discrepancy in the degree of trans-influence between the thiazole and phenyl moieties of **1a** in **INT1** (Scheme S5). As a result, this mode of metal-ligand bonding was revealed to provide more open space around the thiazole than the phenyl side. Such perturbation results in the directional preference in the coordination of Rh metal with an allyl methyl carbonate **2b** to form **INT2**, which showed a 0.2 kcal/mol lower energy than **INT2a** (Scheme S4). Moreover, the proposed intermediate **INT3a** generated through **TS1a** had a higher energy value (-2.7 kcal/mol) than that of **INT2a** (-3.2 kcal/mol). The energy barrier for olefin insertion through **TS1a** (16.2 kcal/mol) was higher than **TS1** (15.7 kcal/mol). As reported by Chang group,<sup>11</sup> these results indicated that the **INT1** may prefer to coordinate with **2b** as **INT2**. While, as shown in Scheme S5 (**INT3a**), the dihedral angle between  $\beta$ -H,  $\alpha$ -C,  $\beta$ -C, and Rh(III) atoms was 113.3. The coordinative model of **INT3a** may prohibit the hydrogen atom from approaching a coplanar configuration to occur  $\beta$ -hydride elimination. Indeed, we didn't observe olefin by-product derived from  $\beta$ -hydride elimination during the reaction even though adding  $\text{Cu}(\text{OAc})_2$  as an oxidant.

DFT calculations allowed us to validate our proposed stepwise olefin insertion and the allyl formation process from **INT2** to **INT5** through the path **A** as shown in Scheme S3.<sup>12</sup> In addition, pathway **B** involving a concerted process to directly produce **INT5** was also considered as shown in Scheme S3. However, we failed to identify any reasonable TS in this mechanism. Thus, our calculated results indicated that the reaction might prefer to occur via the olefin insertion mechanism. The coordinatively saturated species **INT5** can release one  $\text{CO}_2$  to give final product **3a** and unsaturated species  $[\text{Cp}^*\text{RhOMe}]^+$  that could react with **1a** to generate **INT1** to fulfill the catalytic cycle. Although the reaction of Rh-catalysed decarboxylation is important for catalytic cycle, the processes of decarboxylation of **INT5** and formation of **INT1** were not included because the current DFT calculations were only focused on the allylation process. Importantly, the process of releasing  $\text{CO}_2$  from  $\text{HOC}(\text{O})\text{OMe}$  has been calculated.<sup>13</sup>

In addition, a pathway involving a  $\pi$ -allyl rhodium (V) complex generated by oxidative addition of allyl carbonate to a Rh(III) species seems to be less likely owing to the excellent  $\gamma$ -selectivity of reactions involving the branched allyl carbonates **1f-1j**.

---

11 S. H. Park, J. Kwak, K. Shin, J. Ryu, Y. Park and S. Chang, *J. Am. Chem. Soc.*, 2014, **136**, 2492.

12 A. Cajaraville, S. Lopez, J. A. Varela and C. Saa, *Org. Lett.*, 2013, **15**, 4576.

13 A. Dibenedetto, M. Aresta, P. Giannoccaro, C. Pastore, I. Papai and G. Schubert, *Eur. J. Inorg. Chem.*, 2006, 908.

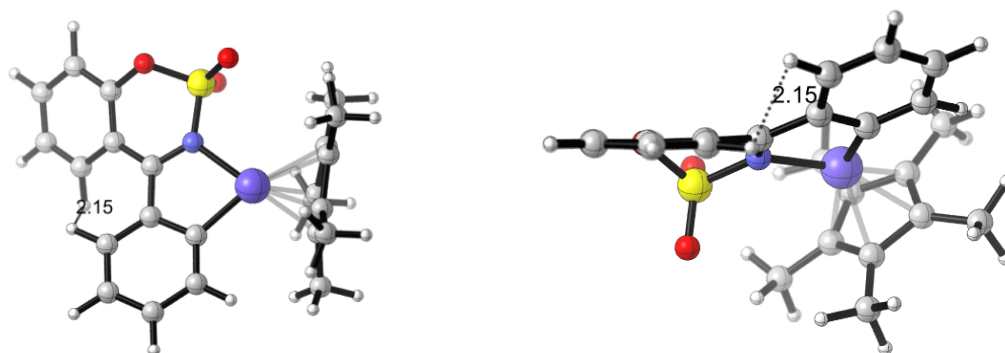

**Scheme S6.** Optimized structure of intermediate **1p-INT1**. The bond distances of the optimized structures are in angstroms.

INT1

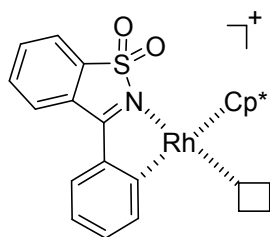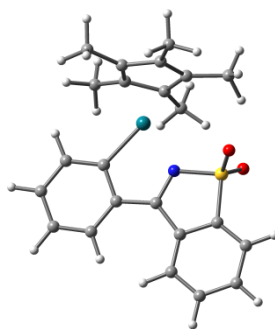

Thermal correction to Gibbs Free Energy= 0.347012 A.U.

E(sof) = -1603.22528394 A.U.

Standard orientation:

| Center Number | Atomic Number | Atomic Type | Coordinates (Angstroms) |           |           |
|---------------|---------------|-------------|-------------------------|-----------|-----------|
|               |               |             | X                       | Y         | Z         |
| 1             | 6             | 0           | 5.717080                | -0.807662 | -0.071000 |
| 2             | 6             | 0           | 5.586458                | 0.584435  | -0.087218 |
| 3             | 6             | 0           | 4.328254                | 1.196861  | -0.079044 |
| 4             | 6             | 0           | 3.176433                | 0.399182  | -0.054059 |
| 5             | 6             | 0           | 3.347108                | -0.995727 | -0.041341 |
| 6             | 6             | 0           | 4.578730                | -1.625664 | -0.046355 |
| 7             | 6             | 0           | 1.735889                | 0.761837  | -0.047435 |
| 8             | 7             | 0           | 0.920016                | -0.276327 | -0.048027 |
| 9             | 16            | 0           | 1.748306                | -1.791218 | 0.001085  |
| 10            | 8             | 0           | 1.448033                | -2.527545 | -1.225564 |
| 11            | 8             | 0           | 1.488066                | -2.408530 | 1.302831  |
| 12            | 6             | 0           | 1.056222                | 2.055856  | -0.038997 |
| 13            | 6             | 0           | -0.370910               | 1.970071  | -0.048503 |
| 14            | 45            | 0           | -1.135036               | 0.074083  | -0.183502 |
| 15            | 6             | 0           | 1.697213                | 3.306959  | -0.033380 |
| 16            | 6             | 0           | 0.943815                | 4.481566  | -0.039733 |
| 17            | 6             | 0           | -0.449144               | 4.409097  | -0.060645 |
| 18            | 6             | 0           | -1.094846               | 3.161637  | -0.064997 |
| 19            | 1             | 0           | 6.704014                | -1.260295 | -0.077862 |
| 20            | 1             | 0           | 6.475963                | 1.206632  | -0.107632 |
| 21            | 1             | 0           | 4.278138                | 2.276602  | -0.095967 |
| 22            | 1             | 0           | 4.661649                | -2.708021 | -0.033696 |
| 23            | 1             | 0           | 2.775502                | 3.389182  | -0.026202 |
| 24            | 1             | 0           | 1.444803                | 5.444733  | -0.031575 |
| 25            | 1             | 0           | -1.039514               | 5.321778  | -0.069054 |
| 26            | 1             | 0           | -2.179950               | 3.144562  | -0.080507 |
| 27            | 6             | 0           | -2.240368               | -1.929958 | 0.311928  |

|    |   |   |           |           |           |
|----|---|---|-----------|-----------|-----------|
| 28 | 6 | 0 | -2.748041 | -1.428643 | -0.896675 |
| 29 | 6 | 0 | -3.294375 | -0.071100 | -0.660552 |
| 30 | 6 | 0 | -3.142274 | 0.231662  | 0.716069  |
| 31 | 6 | 0 | -2.375681 | -0.867437 | 1.307754  |
| 32 | 6 | 0 | -1.684716 | -3.298332 | 0.570831  |
| 33 | 6 | 0 | -2.771647 | -2.117864 | -2.223048 |
| 34 | 6 | 0 | -4.035868 | 0.724706  | -1.690199 |
| 35 | 6 | 0 | -3.737946 | 1.373439  | 1.480790  |
| 36 | 6 | 0 | -2.004431 | -0.990447 | 2.748873  |
| 37 | 1 | 0 | -1.286218 | -3.754946 | -0.338368 |
| 38 | 1 | 0 | -0.881726 | -3.283129 | 1.310795  |
| 39 | 1 | 0 | -2.481807 | -3.951075 | 0.952759  |
| 40 | 1 | 0 | -2.534334 | -1.428817 | -3.040284 |
| 41 | 1 | 0 | -2.066254 | -2.950755 | -2.262516 |
| 42 | 1 | 0 | -3.777303 | -2.515904 | -2.420395 |
| 43 | 1 | 0 | -5.040570 | 0.304183  | -1.837287 |
| 44 | 1 | 0 | -4.154204 | 1.769457  | -1.393140 |
| 45 | 1 | 0 | -3.530240 | 0.704284  | -2.660529 |
| 46 | 1 | 0 | -4.047959 | 2.190869  | 0.825637  |
| 47 | 1 | 0 | -4.634341 | 1.025158  | 2.012001  |
| 48 | 1 | 0 | -3.047880 | 1.775703  | 2.227402  |
| 49 | 1 | 0 | -2.802669 | -1.524280 | 3.286162  |
| 50 | 1 | 0 | -1.080909 | -1.561096 | 2.878355  |
| 51 | 1 | 0 | -1.881100 | -0.013037 | 3.221829  |

-----

**Allyl methyl carbonate (2a)**

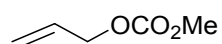

Thermal correction to Gibbs Free Energy= 0.094390

E(sof) = -421.068599597 A.U.

Standard orientation:

-----

| Center<br>Number | Atomic<br>Number | Atomic<br>Type | Coordinates (Angstroms) |           |           |
|------------------|------------------|----------------|-------------------------|-----------|-----------|
|                  |                  |                | X                       | Y         | Z         |
| 1                | 6                | 0              | 3.273098                | 0.418136  | -0.470402 |
| 2                | 6                | 0              | 1.971866                | 0.543243  | -0.195739 |
| 3                | 6                | 0              | 1.252259                | -0.320696 | 0.797366  |
| 4                | 8                | 0              | 0.206680                | -1.123600 | 0.175454  |
| 5                | 6                | 0              | -1.001901               | -0.609850 | -0.091590 |
| 6                | 8                | 0              | -1.886186               | -1.259907 | -0.597427 |
| 7                | 8                | 0              | -1.106998               | 0.690864  | 0.268676  |
| 8                | 6                | 0              | -2.392941               | 1.292421  | 0.019802  |



|    |   |   |           |           |           |
|----|---|---|-----------|-----------|-----------|
| 9  | 1 | 0 | 3.773092  | 1.076648  | -1.175818 |
| 10 | 1 | 0 | 3.887627  | -0.345592 | 0.003229  |
| 11 | 1 | 0 | 1.377653  | 1.314350  | -0.683314 |
| 12 | 1 | 0 | 1.924915  | -1.065364 | 1.228396  |
| 13 | 1 | 0 | 0.808147  | 0.272869  | 1.601589  |
| 14 | 1 | 0 | -2.297443 | 2.322670  | 0.364064  |
| 15 | 1 | 0 | -2.625298 | 1.258964  | -1.047344 |
| 16 | 1 | 0 | -3.170954 | 0.767070  | 0.578946  |

INT2

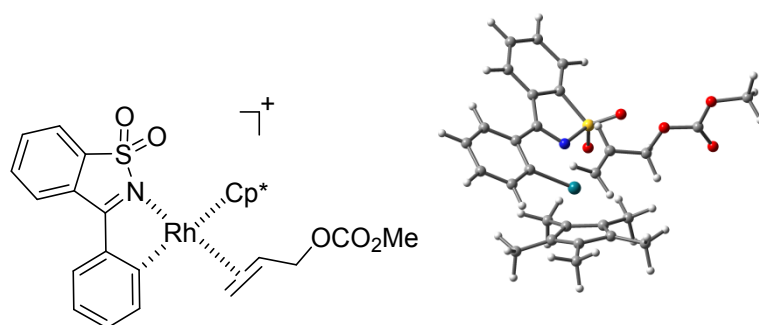

Thermal correction to Gibbs Free Energy= 0.469321

E(sof) = -2024.32729968 A.U.

Standard orientation:

| Center Number | Atomic Number | Atomic Type | Coordinates (Angstroms) |           |           |
|---------------|---------------|-------------|-------------------------|-----------|-----------|
|               |               |             | X                       | Y         | Z         |
| 1             | 45            | 0           | -0.079972               | -1.196404 | 0.034342  |
| 2             | 6             | 0           | -3.074940               | 5.077031  | -0.653256 |
| 3             | 6             | 0           | -3.827246               | 4.470167  | 0.356876  |
| 4             | 6             | 0           | -3.563811               | 3.160596  | 0.775791  |
| 5             | 6             | 0           | -2.527562               | 2.440631  | 0.167261  |
| 6             | 6             | 0           | -1.786202               | 3.088181  | -0.830858 |
| 7             | 6             | 0           | -2.024417               | 4.380657  | -1.265616 |
| 8             | 6             | 0           | -2.014555               | 1.061801  | 0.406793  |
| 9             | 7             | 0           | -0.968884               | 0.728195  | -0.327447 |
| 10            | 16            | 0           | -0.498645               | 2.001263  | -1.411044 |
| 11            | 8             | 0           | -0.743932               | 1.557343  | -2.784686 |
| 12            | 8             | 0           | 0.831902                | 2.477991  | -1.036827 |
| 13            | 6             | 0           | -2.453401               | 0.035155  | 1.335473  |
| 14            | 6             | 0           | -1.629340               | -1.126548 | 1.367366  |
| 15            | 6             | 0           | -3.592676               | 0.119099  | 2.167734  |
| 16            | 6             | 0           | -3.901854               | -0.912889 | 3.043312  |

|    |   |   |           |           |           |
|----|---|---|-----------|-----------|-----------|
| 17 | 6 | 0 | -3.068004 | -2.036087 | 3.109245  |
| 18 | 6 | 0 | -1.945389 | -2.135766 | 2.281690  |
| 19 | 6 | 0 | 1.233425  | -1.165002 | 1.948613  |
| 20 | 6 | 0 | 1.431182  | 0.054113  | 1.334369  |
| 21 | 6 | 0 | 2.679490  | 0.395169  | 0.561239  |
| 22 | 8 | 0 | 3.458743  | 1.228691  | 1.448625  |
| 23 | 6 | 0 | 4.659760  | 1.595862  | 0.950529  |
| 24 | 8 | 0 | 5.108282  | 1.235639  | -0.119206 |
| 25 | 8 | 0 | 5.249326  | 2.398482  | 1.834280  |
| 26 | 6 | 0 | 6.559230  | 2.879865  | 1.459618  |
| 27 | 6 | 0 | -0.687666 | -2.116526 | -1.945408 |
| 28 | 6 | 0 | 0.745426  | -1.840803 | -2.118373 |
| 29 | 6 | 0 | 1.438170  | -2.601289 | -1.162041 |
| 30 | 6 | 0 | 0.456875  | -3.349202 | -0.361178 |
| 31 | 6 | 0 | -0.838635 | -3.122385 | -0.934199 |
| 32 | 6 | 0 | -1.772492 | -1.642871 | -2.863312 |
| 33 | 6 | 0 | 1.350447  | -1.024464 | -3.222815 |
| 34 | 6 | 0 | 2.922275  | -2.780565 | -1.058522 |
| 35 | 6 | 0 | 0.805462  | -4.440095 | 0.608292  |
| 36 | 6 | 0 | -2.096978 | -3.875723 | -0.626847 |
| 37 | 1 | 0 | -3.297666 | 6.094294  | -0.960544 |
| 38 | 1 | 0 | -4.631102 | 5.023426  | 0.832951  |
| 39 | 1 | 0 | -4.162434 | 2.744016  | 1.573379  |
| 40 | 1 | 0 | -1.419936 | 4.837601  | -2.043027 |
| 41 | 1 | 0 | -4.250325 | 0.976150  | 2.127851  |
| 42 | 1 | 0 | -4.780817 | -0.843043 | 3.676635  |
| 43 | 1 | 0 | -3.294970 | -2.839003 | 3.806251  |
| 44 | 1 | 0 | -1.315612 | -3.016819 | 2.365119  |
| 45 | 1 | 0 | 1.964385  | -1.959684 | 1.831432  |
| 46 | 1 | 0 | 0.535575  | -1.274528 | 2.769701  |
| 47 | 1 | 0 | 0.835404  | 0.906172  | 1.650581  |
| 48 | 1 | 0 | 3.257422  | -0.495781 | 0.310982  |
| 49 | 1 | 0 | 2.463387  | 0.959132  | -0.346940 |
| 50 | 1 | 0 | 6.874999  | 3.509815  | 2.290488  |
| 51 | 1 | 0 | 7.245824  | 2.040489  | 1.326222  |
| 52 | 1 | 0 | 6.497528  | 3.458389  | 0.534909  |
| 53 | 1 | 0 | -1.831058 | -2.316917 | -3.730176 |
| 54 | 1 | 0 | -1.583530 | -0.634582 | -3.235046 |
| 55 | 1 | 0 | -2.750619 | -1.654339 | -2.374575 |
| 56 | 1 | 0 | 1.503482  | -1.657938 | -4.108111 |
| 57 | 1 | 0 | 2.325182  | -0.617074 | -2.940305 |
| 58 | 1 | 0 | 0.710446  | -0.191112 | -3.517990 |
| 59 | 1 | 0 | 3.262569  | -2.894676 | -0.024819 |
| 60 | 1 | 0 | 3.475962  | -1.957474 | -1.515842 |

|    |   |   |           |           |           |
|----|---|---|-----------|-----------|-----------|
| 61 | 1 | 0 | 3.209082  | -3.701474 | -1.586490 |
| 62 | 1 | 0 | 1.013791  | -5.370400 | 0.061170  |
| 63 | 1 | 0 | -0.011683 | -4.651124 | 1.303473  |
| 64 | 1 | 0 | 1.697956  | -4.206736 | 1.195201  |
| 65 | 1 | 0 | -2.174017 | -4.740089 | -1.301151 |
| 66 | 1 | 0 | -2.990243 | -3.263262 | -0.772495 |
| 67 | 1 | 0 | -2.113753 | -4.256677 | 0.396441  |

INT2a

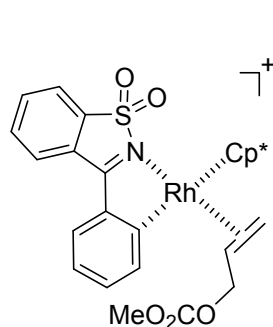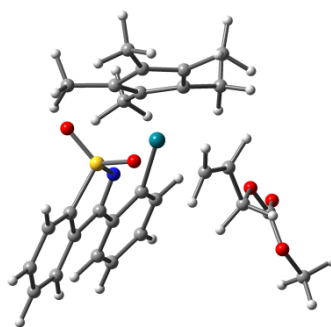

Thermal correction to Gibbs Free Energy=

0.468294 A.U.

E(sof) = -2024.32592959 A.U.

Standard orientation:

| Center Number | Atomic Number | Atomic Type | Coordinates (Angstroms) |           |           |
|---------------|---------------|-------------|-------------------------|-----------|-----------|
|               |               |             | X                       | Y         | Z         |
| 1             | 45            | 0           | 0.219760                | -0.915212 | -0.018985 |
| 2             | 6             | 0           | -5.657623               | 2.774772  | -0.608513 |
| 3             | 6             | 0           | -4.794056               | 3.653481  | 0.052720  |
| 4             | 6             | 0           | -3.501255               | 3.264110  | 0.422954  |
| 5             | 6             | 0           | -3.066646               | 1.965147  | 0.130607  |
| 6             | 6             | 0           | -3.953255               | 1.118959  | -0.550859 |
| 7             | 6             | 0           | -5.236802               | 1.476579  | -0.926704 |
| 8             | 6             | 0           | -1.764902               | 1.285847  | 0.383955  |
| 9             | 7             | 0           | -1.687545               | 0.056884  | -0.090882 |
| 10            | 16            | 0           | -3.160737               | -0.452173 | -0.845573 |
| 11            | 8             | 0           | -3.760926               | -1.508711 | -0.028493 |
| 12            | 8             | 0           | -2.902832               | -0.695119 | -2.265047 |
| 13            | 6             | 0           | -0.556037               | 1.756151  | 1.032830  |
| 14            | 6             | 0           | 0.557786                | 0.869650  | 0.927965  |
| 15            | 6             | 0           | -0.442990               | 2.966369  | 1.754826  |
| 16            | 6             | 0           | 0.759529                | 3.314695  | 2.353927  |
| 17            | 6             | 0           | 1.863595                | 2.461133  | 2.230526  |
| 18            | 6             | 0           | 1.761170                | 1.256751  | 1.526728  |

|    |   |   |           |           |           |
|----|---|---|-----------|-----------|-----------|
| 19 | 6 | 0 | -0.340579 | -2.514432 | 1.451573  |
| 20 | 6 | 0 | -0.412508 | -3.210278 | 0.158124  |
| 21 | 6 | 0 | 0.867697  | -3.171154 | -0.413360 |
| 22 | 6 | 0 | 1.774759  | -2.474476 | 0.515348  |
| 23 | 6 | 0 | 1.032320  | -2.173585 | 1.703434  |
| 24 | 6 | 0 | -1.454795 | -2.445260 | 2.450929  |
| 25 | 6 | 0 | -1.603386 | -3.951639 | -0.373608 |
| 26 | 6 | 0 | 1.284280  | -3.830204 | -1.693809 |
| 27 | 6 | 0 | 3.269210  | -2.437408 | 0.391556  |
| 28 | 6 | 0 | 1.595639  | -1.715197 | 3.013788  |
| 29 | 6 | 0 | 0.279431  | -0.173964 | -2.214114 |
| 30 | 6 | 0 | 1.614572  | -0.203681 | -1.887018 |
| 31 | 6 | 0 | 2.467404  | 1.023001  | -1.747627 |
| 32 | 8 | 0 | 3.576465  | 0.678862  | -0.896088 |
| 33 | 6 | 0 | 4.605289  | 1.536921  | -0.721140 |
| 34 | 8 | 0 | 5.482647  | 1.307557  | 0.076876  |
| 35 | 8 | 0 | 4.511037  | 2.613873  | -1.514403 |
| 36 | 6 | 0 | 5.596935  | 3.566748  | -1.405328 |
| 37 | 1 | 0 | -6.656073 | 3.099621  | -0.885082 |
| 38 | 1 | 0 | -5.127185 | 4.661019  | 0.282666  |
| 39 | 1 | 0 | -2.862826 | 3.985164  | 0.914167  |
| 40 | 1 | 0 | -5.888015 | 0.783570  | -1.450389 |
| 41 | 1 | 0 | -1.293647 | 3.622783  | 1.879026  |
| 42 | 1 | 0 | 0.839217  | 4.239587  | 2.917045  |
| 43 | 1 | 0 | 2.810656  | 2.728944  | 2.692830  |
| 44 | 1 | 0 | 2.641515  | 0.630296  | 1.445846  |
| 45 | 1 | 0 | -1.493768 | -3.384497 | 3.021207  |
| 46 | 1 | 0 | -2.425093 | -2.308440 | 1.968764  |
| 47 | 1 | 0 | -1.305857 | -1.632394 | 3.166864  |
| 48 | 1 | 0 | -1.566623 | -4.994525 | -0.027699 |
| 49 | 1 | 0 | -1.618659 | -3.971105 | -1.467226 |
| 50 | 1 | 0 | -2.546076 | -3.519943 | -0.035650 |
| 51 | 1 | 0 | 1.653993  | -4.843824 | -1.484264 |
| 52 | 1 | 0 | 2.097630  | -3.299544 | -2.197186 |
| 53 | 1 | 0 | 0.450763  | -3.926825 | -2.394752 |
| 54 | 1 | 0 | 3.695118  | -3.339458 | 0.853754  |
| 55 | 1 | 0 | 3.707818  | -1.569224 | 0.888081  |
| 56 | 1 | 0 | 3.599988  | -2.419110 | -0.649236 |
| 57 | 1 | 0 | 1.784799  | -2.592961 | 3.647562  |
| 58 | 1 | 0 | 0.908321  | -1.059861 | 3.554533  |
| 59 | 1 | 0 | 2.545282  | -1.189452 | 2.894874  |
| 60 | 1 | 0 | -0.208022 | -1.013784 | -2.697567 |
| 61 | 1 | 0 | -0.256028 | 0.769905  | -2.260243 |
| 62 | 1 | 0 | 2.180124  | -1.115088 | -2.055708 |

|    |   |   |          |          |           |
|----|---|---|----------|----------|-----------|
| 63 | 1 | 0 | 2.844383 | 1.299893 | -2.740007 |
| 64 | 1 | 0 | 1.921137 | 1.874905 | -1.334504 |
| 65 | 1 | 0 | 5.349750 | 4.358596 | -2.111554 |
| 66 | 1 | 0 | 5.652277 | 3.954404 | -0.385994 |
| 67 | 1 | 0 | 6.540730 | 3.086531 | -1.671512 |

INT2'

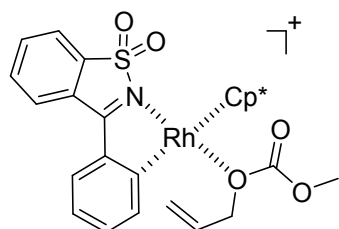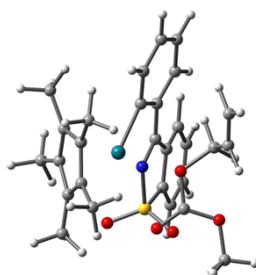

Standard orientation:

| Center Number | Atomic Number | Atomic Type | Coordinates (Angstroms) |           |           |
|---------------|---------------|-------------|-------------------------|-----------|-----------|
|               |               |             | X                       | Y         | Z         |
| 1             | 45            | 0           | 0.948955                | 0.271510  | 0.527720  |
| 2             | 6             | 0           | -5.998788               | -0.293338 | 0.115911  |
| 3             | 6             | 0           | -5.748267               | 1.026492  | -0.272822 |
| 4             | 6             | 0           | -4.441405               | 1.511980  | -0.399878 |
| 5             | 6             | 0           | -3.364563               | 0.654587  | -0.139329 |
| 6             | 6             | 0           | -3.654093               | -0.652362 | 0.275011  |
| 7             | 6             | 0           | -4.935591               | -1.158560 | 0.407889  |
| 8             | 6             | 0           | -1.894734               | 0.892375  | -0.164309 |
| 9             | 7             | 0           | -1.162751               | -0.114817 | 0.270153  |
| 10            | 16            | 0           | -2.127994               | -1.505436 | 0.638927  |
| 11            | 8             | 0           | -2.012281               | -1.801180 | 2.067997  |
| 12            | 8             | 0           | -1.843667               | -2.546298 | -0.348261 |
| 13            | 6             | 0           | -1.135288               | 2.056282  | -0.602099 |
| 14            | 6             | 0           | 0.269129                | 1.968252  | -0.372915 |
| 15            | 6             | 0           | -1.680652               | 3.159362  | -1.291889 |
| 16            | 6             | 0           | -0.854677               | 4.185903  | -1.739448 |
| 17            | 6             | 0           | 0.523815                | 4.109326  | -1.515278 |
| 18            | 6             | 0           | 1.074903                | 3.008162  | -0.846625 |
| 19            | 6             | 0           | 1.145591                | 0.313622  | 2.690442  |
| 20            | 6             | 0           | 1.693096                | -1.016032 | 2.398394  |
| 21            | 6             | 0           | 2.805044                | -0.832749 | 1.567314  |
| 22            | 6             | 0           | 2.989683                | 0.608566  | 1.322681  |
| 23            | 6             | 0           | 2.037352                | 1.311712  | 2.123566  |
| 24            | 6             | 0           | 0.033139                | 0.585019  | 3.654188  |

|    |   |   |           |           |           |
|----|---|---|-----------|-----------|-----------|
| 25 | 6 | 0 | 1.182828  | -2.315558 | 2.946211  |
| 26 | 6 | 0 | 3.724073  | -1.881987 | 1.031789  |
| 27 | 6 | 0 | 4.177950  | 1.190820  | 0.616050  |
| 28 | 6 | 0 | 2.025037  | 2.775087  | 2.444910  |
| 29 | 6 | 0 | 2.975388  | 0.714915  | -4.282444 |
| 30 | 6 | 0 | 2.214457  | -0.311955 | -3.890933 |
| 31 | 6 | 0 | 0.991699  | -0.142542 | -3.043206 |
| 32 | 8 | 0 | 1.145346  | -0.804094 | -1.727545 |
| 33 | 6 | 0 | 1.015880  | -2.158892 | -1.622965 |
| 34 | 8 | 0 | 1.269423  | -2.724003 | -0.586055 |
| 35 | 8 | 0 | 0.598832  | -2.718933 | -2.754660 |
| 36 | 6 | 0 | 0.350222  | -4.148707 | -2.690149 |
| 37 | 1 | 0 | -7.021153 | -0.647664 | 0.206884  |
| 38 | 1 | 0 | -6.580962 | 1.693485  | -0.474684 |
| 39 | 1 | 0 | -4.295420 | 2.548382  | -0.672165 |
| 40 | 1 | 0 | -5.110755 | -2.179358 | 0.733384  |
| 41 | 1 | 0 | -2.737224 | 3.211163  | -1.518735 |
| 42 | 1 | 0 | -1.279590 | 5.031876  | -2.271073 |
| 43 | 1 | 0 | 1.174712  | 4.905229  | -1.869315 |
| 44 | 1 | 0 | 2.152119  | 2.969494  | -0.713905 |
| 45 | 1 | 0 | 0.424505  | 0.540773  | 4.680947  |
| 46 | 1 | 0 | -0.762110 | -0.159036 | 3.568559  |
| 47 | 1 | 0 | -0.399407 | 1.578460  | 3.508508  |
| 48 | 1 | 0 | 0.107465  | -2.285639 | 3.131076  |
| 49 | 1 | 0 | 1.683383  | -2.544878 | 3.897459  |
| 50 | 1 | 0 | 1.376949  | -3.140462 | 2.255977  |
| 51 | 1 | 0 | 4.669529  | -1.853028 | 1.592860  |
| 52 | 1 | 0 | 3.967389  | -1.707720 | -0.020779 |
| 53 | 1 | 0 | 3.300079  | -2.882321 | 1.119819  |
| 54 | 1 | 0 | 5.071226  | 1.114670  | 1.252003  |
| 55 | 1 | 0 | 4.037842  | 2.249030  | 0.380113  |
| 56 | 1 | 0 | 4.395588  | 0.660665  | -0.316014 |
| 57 | 1 | 0 | 2.591344  | 2.940908  | 3.372064  |
| 58 | 1 | 0 | 1.012962  | 3.156139  | 2.602613  |
| 59 | 1 | 0 | 2.493198  | 3.376028  | 1.662521  |
| 60 | 1 | 0 | 3.834973  | 0.571190  | -4.931388 |
| 61 | 1 | 0 | 2.755068  | 1.738485  | -3.984487 |
| 62 | 1 | 0 | 2.446469  | -1.324234 | -4.217142 |
| 63 | 1 | 0 | 0.825753  | 0.902268  | -2.784876 |
| 64 | 1 | 0 | 0.097431  | -0.555034 | -3.514617 |
| 65 | 1 | 0 | 0.013251  | -4.418075 | -3.690317 |
| 66 | 1 | 0 | 1.272767  | -4.673258 | -2.433654 |
| 67 | 1 | 0 | -0.421796 | -4.347434 | -1.945141 |

TS1

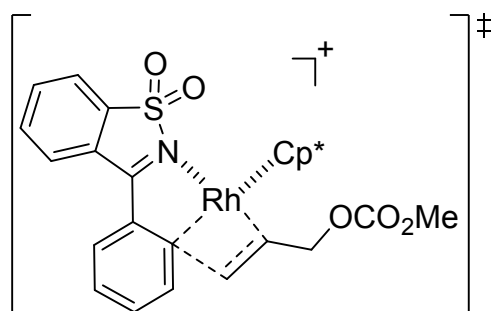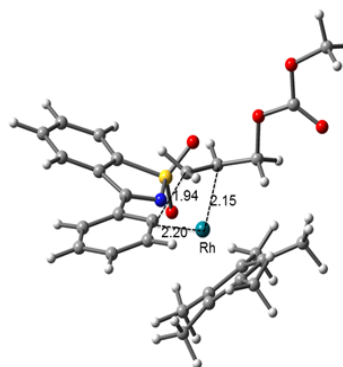

Imaginary frequency: -315.75

Thermal correction to Gibbs Free Energy= 0.470473 A.U.

E(sof) = -2024.30335553 A.U.

Standard orientation:

| Center Number | Atomic Number | Atomic Type | Coordinates (Angstroms) |           |           |
|---------------|---------------|-------------|-------------------------|-----------|-----------|
|               |               |             | X                       | Y         | Z         |
| 1             | 45            | 0           | 0.333903                | -0.861712 | -0.166943 |
| 2             | 6             | 0           | -5.250397               | 3.327011  | -0.302100 |
| 3             | 6             | 0           | -5.262528               | 2.801116  | 0.994355  |
| 4             | 6             | 0           | -4.319586               | 1.848860  | 1.399828  |
| 5             | 6             | 0           | -3.360087               | 1.412259  | 0.479304  |
| 6             | 6             | 0           | -3.357860               | 1.977910  | -0.802878 |
| 7             | 6             | 0           | -4.275587               | 2.923530  | -1.226571 |
| 8             | 6             | 0           | -2.238701               | 0.456225  | 0.645426  |
| 9             | 7             | 0           | -1.433286               | 0.348455  | -0.388872 |
| 10            | 16            | 0           | -1.964623               | 1.334353  | -1.723624 |
| 11            | 8             | 0           | -2.391663               | 0.437103  | -2.798264 |
| 12            | 8             | 0           | -0.957166               | 2.360596  | -1.983787 |
| 13            | 6             | 0           | -1.876669               | -0.348498 | 1.801457  |
| 14            | 6             | 0           | -0.509379               | -0.762974 | 1.858433  |
| 15            | 6             | 0           | -2.797372               | -0.794281 | 2.766600  |
| 16            | 6             | 0           | -2.383653               | -1.633952 | 3.798296  |
| 17            | 6             | 0           | -1.041283               | -2.026332 | 3.875223  |
| 18            | 6             | 0           | -0.118424               | -1.589440 | 2.923204  |
| 19            | 6             | 0           | 0.823970                | 0.628554  | 1.625343  |
| 20            | 6             | 0           | 1.297550                | 0.996488  | 0.306103  |
| 21            | 6             | 0           | 2.780455                | 1.022783  | 0.068262  |
| 22            | 8             | 0           | 3.285196                | 2.217164  | 0.720595  |
| 23            | 6             | 0           | 4.602404                | 2.442457  | 0.526454  |

|    |   |   |           |           |           |
|----|---|---|-----------|-----------|-----------|
| 24 | 8 | 0 | 5.347791  | 1.714778  | -0.099826 |
| 25 | 8 | 0 | 4.927824  | 3.579991  | 1.137609  |
| 26 | 6 | 0 | 6.313057  | 3.975350  | 1.020967  |
| 27 | 6 | 0 | -0.275604 | -2.639208 | -1.473152 |
| 28 | 6 | 0 | 0.699021  | -1.792361 | -2.185914 |
| 29 | 6 | 0 | 1.940311  | -1.880920 | -1.494775 |
| 30 | 6 | 0 | 1.715844  | -2.643242 | -0.288243 |
| 31 | 6 | 0 | 0.364172  | -3.188255 | -0.339754 |
| 32 | 6 | 0 | -1.654828 | -2.943810 | -1.973856 |
| 33 | 6 | 0 | 0.487992  | -1.192864 | -3.544190 |
| 34 | 6 | 0 | 3.270076  | -1.426461 | -2.016943 |
| 35 | 6 | 0 | 2.782040  | -3.077410 | 0.674216  |
| 36 | 6 | 0 | -0.194241 | -4.207280 | 0.605410  |
| 37 | 1 | 0 | -5.991062 | 4.065640  | -0.593334 |
| 38 | 1 | 0 | -6.009826 | 3.142629  | 1.704164  |
| 39 | 1 | 0 | -4.332102 | 1.486038  | 2.420586  |
| 40 | 1 | 0 | -4.239600 | 3.342682  | -2.227341 |
| 41 | 1 | 0 | -3.846263 | -0.531909 | 2.684559  |
| 42 | 1 | 0 | -3.100389 | -1.983507 | 4.534872  |
| 43 | 1 | 0 | -0.711646 | -2.672899 | 4.684329  |
| 44 | 1 | 0 | 0.924100  | -1.879008 | 3.024339  |
| 45 | 1 | 0 | 1.579826  | 0.246360  | 2.307326  |
| 46 | 1 | 0 | 0.149037  | 1.333116  | 2.103776  |
| 47 | 1 | 0 | 0.766569  | 1.803195  | -0.193123 |
| 48 | 1 | 0 | 3.285922  | 0.153840  | 0.499612  |
| 49 | 1 | 0 | 3.024768  | 1.083814  | -0.993163 |
| 50 | 1 | 0 | 6.385315  | 4.911344  | 1.573709  |
| 51 | 1 | 0 | 6.961494  | 3.213545  | 1.460112  |
| 52 | 1 | 0 | 6.574802  | 4.123897  | -0.029290 |
| 53 | 1 | 0 | -1.600903 | -3.714325 | -2.755918 |
| 54 | 1 | 0 | -2.129032 | -2.063224 | -2.414279 |
| 55 | 1 | 0 | -2.303543 | -3.326226 | -1.181117 |
| 56 | 1 | 0 | 0.692849  | -1.949893 | -4.315220 |
| 57 | 1 | 0 | 1.159568  | -0.349021 | -3.724320 |
| 58 | 1 | 0 | -0.536342 | -0.843125 | -3.684628 |
| 59 | 1 | 0 | 3.993008  | -1.212529 | -1.227082 |
| 60 | 1 | 0 | 3.188364  | -0.543125 | -2.654984 |
| 61 | 1 | 0 | 3.694723  | -2.231214 | -2.634103 |
| 62 | 1 | 0 | 3.280302  | -3.981372 | 0.295927  |
| 63 | 1 | 0 | 2.371733  | -3.325192 | 1.657076  |
| 64 | 1 | 0 | 3.555391  | -2.315278 | 0.807089  |
| 65 | 1 | 0 | 0.179437  | -5.205658 | 0.339441  |
| 66 | 1 | 0 | -1.285928 | -4.243835 | 0.569161  |
| 67 | 1 | 0 | 0.100710  | -4.015117 | 1.640711  |



---

**TS1a**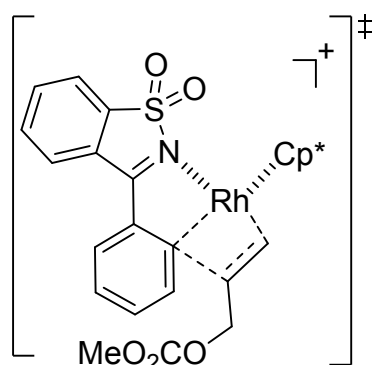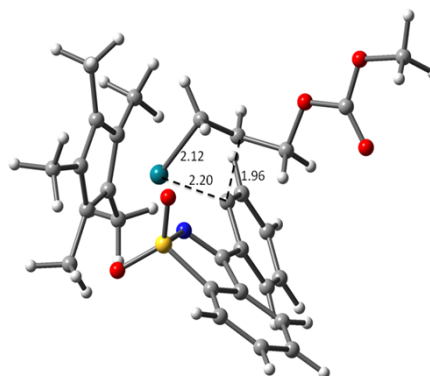

Imaginary frequency: 318.015

Thermal correction to Gibbs Free Energy=

0.469757

E(sof) = -2024.301717 A.U.

Standard orientation:

---

| Center Number | Atomic Number | Atomic Type | Coordinates (Angstroms) |           |           |
|---------------|---------------|-------------|-------------------------|-----------|-----------|
|               |               |             | X                       | Y         | Z         |
| 1             | 45            | 0           | -0.093974               | 0.882062  | -0.171647 |
| 2             | 6             | 0           | 5.715118                | -2.779852 | -1.358673 |
| 3             | 6             | 0           | 5.654965                | -2.699509 | 0.036774  |
| 4             | 6             | 0           | 4.646278                | -1.970686 | 0.678288  |
| 5             | 6             | 0           | 3.694468                | -1.304382 | -0.101289 |
| 6             | 6             | 0           | 3.763896                | -1.428397 | -1.495555 |
| 7             | 6             | 0           | 4.747940                | -2.146198 | -2.153104 |
| 8             | 6             | 0           | 2.517655                | -0.501703 | 0.306463  |
| 9             | 7             | 0           | 1.736454                | -0.105142 | -0.672400 |
| 10            | 16            | 0           | 2.355882                | -0.599010 | -2.226456 |
| 11            | 8             | 0           | 2.746309                | 0.609581  | -2.953204 |
| 12            | 8             | 0           | 1.419185                | -1.545993 | -2.827951 |
| 13            | 6             | 0           | 2.082527                | -0.108815 | 1.639941  |
| 14            | 6             | 0           | 0.695713                | 0.216343  | 1.769208  |
| 15            | 6             | 0           | 2.967331                | 0.085040  | 2.715546  |
| 16            | 6             | 0           | 2.500770                | 0.591113  | 3.926559  |
| 17            | 6             | 0           | 1.141641                | 0.897172  | 4.072549  |
| 18            | 6             | 0           | 0.254751                | 0.699929  | 3.013408  |
| 19            | 6             | 0           | -0.993286               | -1.030282 | -0.263823 |
| 20            | 6             | 0           | -0.633970               | -1.077439 | 1.139873  |
| 21            | 6             | 0           | 0.089475                | -2.332227 | 1.626909  |
| 22            | 8             | 0           | -0.890927               | -3.379823 | 1.528735  |
| 23            | 6             | 0           | -0.413756               | -4.621677 | 1.781291  |

|    |   |   |           |           |           |
|----|---|---|-----------|-----------|-----------|
| 24 | 8 | 0 | 0.743047  | -4.878108 | 2.045771  |
| 25 | 8 | 0 | -1.424096 | -5.480143 | 1.683344  |
| 26 | 6 | 0 | -1.089275 | -6.867662 | 1.915427  |
| 27 | 6 | 0 | 0.273457  | 3.005260  | -0.989930 |
| 28 | 6 | 0 | -0.607807 | 2.231591  | -1.886807 |
| 29 | 6 | 0 | -1.817590 | 1.966466  | -1.183792 |
| 30 | 6 | 0 | -1.654383 | 2.449680  | 0.168406  |
| 31 | 6 | 0 | -0.385865 | 3.166175  | 0.248375  |
| 32 | 6 | 0 | 1.583315  | 3.602040  | -1.406955 |
| 33 | 6 | 0 | -0.365624 | 2.007614  | -3.349811 |
| 34 | 6 | 0 | -3.064214 | 1.360680  | -1.756620 |
| 35 | 6 | 0 | -2.729911 | 2.479789  | 1.214363  |
| 36 | 6 | 0 | 0.081340  | 3.968642  | 1.424965  |
| 37 | 1 | 0 | 6.506375  | -3.351801 | -1.833853 |
| 38 | 1 | 0 | 6.395968  | -3.219637 | 0.636055  |
| 39 | 1 | 0 | 4.601076  | -1.958067 | 1.760741  |
| 40 | 1 | 0 | 4.768091  | -2.224316 | -3.235702 |
| 41 | 1 | 0 | 4.028132  | -0.102912 | 2.592429  |
| 42 | 1 | 0 | 3.190155  | 0.750456  | 4.749966  |
| 43 | 1 | 0 | 0.772046  | 1.285645  | 5.017925  |
| 44 | 1 | 0 | -0.800434 | 0.911329  | 3.165166  |
| 45 | 1 | 0 | -0.482718 | -1.704257 | -0.947741 |
| 46 | 1 | 0 | -2.041999 | -0.870389 | -0.499082 |
| 47 | 1 | 0 | -1.434909 | -0.779766 | 1.813031  |
| 48 | 1 | 0 | 0.945840  | -2.581057 | 0.996079  |
| 49 | 1 | 0 | 0.421662  | -2.244565 | 2.664305  |
| 50 | 1 | 0 | -2.027394 | -7.406856 | 1.789951  |
| 51 | 1 | 0 | -0.348049 | -7.202398 | 1.186083  |
| 52 | 1 | 0 | -0.699471 | -6.996211 | 2.927801  |
| 53 | 1 | 0 | 1.402689  | 4.512046  | -1.996512 |
| 54 | 1 | 0 | 2.160379  | 2.916498  | -2.033070 |
| 55 | 1 | 0 | 2.197159  | 3.883805  | -0.547344 |
| 56 | 1 | 0 | -0.715075 | 2.880918  | -3.919295 |
| 57 | 1 | 0 | -0.906047 | 1.132723  | -3.721314 |
| 58 | 1 | 0 | 0.693680  | 1.866915  | -3.573259 |
| 59 | 1 | 0 | -3.663459 | 0.849750  | -0.997196 |
| 60 | 1 | 0 | -2.845464 | 0.647922  | -2.556306 |
| 61 | 1 | 0 | -3.694552 | 2.151983  | -2.185272 |
| 62 | 1 | 0 | -3.389767 | 3.342777  | 1.047114  |
| 63 | 1 | 0 | -2.318238 | 2.581623  | 2.222177  |
| 64 | 1 | 0 | -3.358646 | 1.584525  | 1.188304  |
| 65 | 1 | 0 | -0.435472 | 4.937700  | 1.451562  |
| 66 | 1 | 0 | 1.154779  | 4.169115  | 1.379749  |
| 67 | 1 | 0 | -0.124207 | 3.464131  | 2.373995  |

INT3

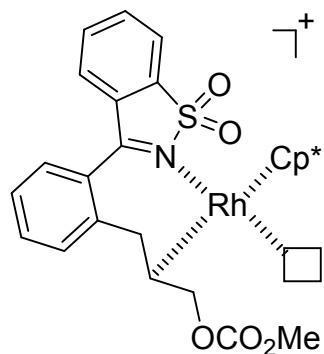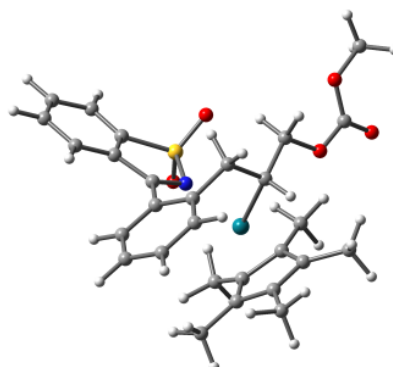

Thermal correction to Gibbs Free Energy=

0.469535

E(sof) = -2024.33114223 A.U.

Standard orientation:

| Center Number | Atomic Number | Atomic Type | Coordinates (Angstroms) |           |           |
|---------------|---------------|-------------|-------------------------|-----------|-----------|
|               |               |             | X                       | Y         | Z         |
| 1             | 45            | 0           | -0.605301               | -0.896518 | 0.192815  |
| 2             | 6             | 0           | 5.024980                | 3.218776  | 0.697522  |
| 3             | 6             | 0           | 5.457845                | 2.191836  | -0.149498 |
| 4             | 6             | 0           | 4.595288                | 1.155397  | -0.528011 |
| 5             | 6             | 0           | 3.289594                | 1.159060  | -0.029599 |
| 6             | 6             | 0           | 2.878612                | 2.203760  | 0.805980  |
| 7             | 6             | 0           | 3.708408                | 3.243967  | 1.185816  |
| 8             | 6             | 0           | 2.190189                | 0.207378  | -0.297207 |
| 9             | 7             | 0           | 1.048926                | 0.477684  | 0.273830  |
| 10            | 16            | 0           | 1.146976                | 1.971066  | 1.204213  |
| 11            | 8             | 0           | 0.944809                | 1.640905  | 2.613171  |
| 12            | 8             | 0           | 0.300561                | 2.965125  | 0.548628  |
| 13            | 6             | 0           | 2.293002                | -0.991135 | -1.157015 |
| 14            | 6             | 0           | 1.355222                | -1.196237 | -2.202374 |
| 15            | 6             | 0           | 3.303698                | -1.935938 | -0.903456 |
| 16            | 6             | 0           | 3.379546                | -3.105802 | -1.657595 |
| 17            | 6             | 0           | 2.458268                | -3.322357 | -2.687174 |
| 18            | 6             | 0           | 1.470265                | -2.372259 | -2.956330 |
| 19            | 6             | 0           | -1.070193               | -1.578955 | 2.434586  |
| 20            | 6             | 0           | -2.164365               | -0.903199 | 1.713997  |
| 21            | 6             | 0           | -2.596683               | -1.760442 | 0.618537  |
| 22            | 6             | 0           | -1.635005               | -2.802771 | 0.528965  |

|    |   |   |           |           |           |
|----|---|---|-----------|-----------|-----------|
| 23 | 6 | 0 | -0.723312 | -2.709850 | 1.697324  |
| 24 | 6 | 0 | -0.495869 | -1.108439 | 3.735416  |
| 25 | 6 | 0 | -2.882963 | 0.300454  | 2.225607  |
| 26 | 6 | 0 | -3.865577 | -1.638372 | -0.167609 |
| 27 | 6 | 0 | -1.653919 | -3.953175 | -0.429258 |
| 28 | 6 | 0 | 0.346070  | -3.713930 | 1.994758  |
| 29 | 6 | 0 | 0.313798  | -0.149721 | -2.568012 |
| 30 | 6 | 0 | -0.999539 | -0.171397 | -1.746376 |
| 31 | 6 | 0 | -1.634192 | 1.209934  | -1.830645 |
| 32 | 8 | 0 | -2.862657 | 1.199220  | -1.072435 |
| 33 | 6 | 0 | -3.655441 | 2.283967  | -1.014035 |
| 34 | 8 | 0 | -4.639661 | 2.299254  | -0.306823 |
| 35 | 8 | 0 | -3.231703 | 3.281732  | -1.800425 |
| 36 | 6 | 0 | -4.037943 | 4.483366  | -1.774302 |
| 37 | 1 | 0 | 5.711108  | 4.013017  | 0.975992  |
| 38 | 1 | 0 | 6.476591  | 2.201622  | -0.524895 |
| 39 | 1 | 0 | 4.933347  | 0.374298  | -1.201160 |
| 40 | 1 | 0 | 3.361804  | 4.046275  | 1.829710  |
| 41 | 1 | 0 | 4.010874  | -1.765993 | -0.095971 |
| 42 | 1 | 0 | 4.155520  | -3.836625 | -1.449721 |
| 43 | 1 | 0 | 2.520335  | -4.222546 | -3.292418 |
| 44 | 1 | 0 | 0.783579  | -2.533522 | -3.783941 |
| 45 | 1 | 0 | -1.204278 | -1.316139 | 4.549243  |
| 46 | 1 | 0 | -0.301368 | -0.033605 | 3.730517  |
| 47 | 1 | 0 | 0.441109  | -1.617657 | 3.975198  |
| 48 | 1 | 0 | -3.586640 | -0.015683 | 3.011500  |
| 49 | 1 | 0 | -3.458175 | 0.805056  | 1.447522  |
| 50 | 1 | 0 | -2.192240 | 1.016983  | 2.680098  |
| 51 | 1 | 0 | -4.630972 | -2.282213 | 0.287913  |
| 52 | 1 | 0 | -3.740128 | -1.965527 | -1.204240 |
| 53 | 1 | 0 | -4.242234 | -0.615786 | -0.180510 |
| 54 | 1 | 0 | -2.224151 | -3.719541 | -1.331850 |
| 55 | 1 | 0 | -2.126837 | -4.825260 | 0.044743  |
| 56 | 1 | 0 | -0.644025 | -4.252170 | -0.726931 |
| 57 | 1 | 0 | -0.103684 | -4.648449 | 2.358343  |
| 58 | 1 | 0 | 1.039579  | -3.358880 | 2.760756  |
| 59 | 1 | 0 | 0.924838  | -3.966430 | 1.099468  |
| 60 | 1 | 0 | 0.069256  | -0.273528 | -3.632114 |
| 61 | 1 | 0 | 0.771510  | 0.843743  | -2.483438 |
| 62 | 1 | 0 | -1.687045 | -0.914995 | -2.166640 |
| 63 | 1 | 0 | -0.976876 | 1.985757  | -1.428169 |
| 64 | 1 | 0 | -1.866612 | 1.463675  | -2.874263 |
| 65 | 1 | 0 | -3.542271 | 5.170750  | -2.459107 |
| 66 | 1 | 0 | -5.052388 | 4.259988  | -2.111389 |

67 1 0 -4.064597 4.892460 -0.762157

---

**INT3a**

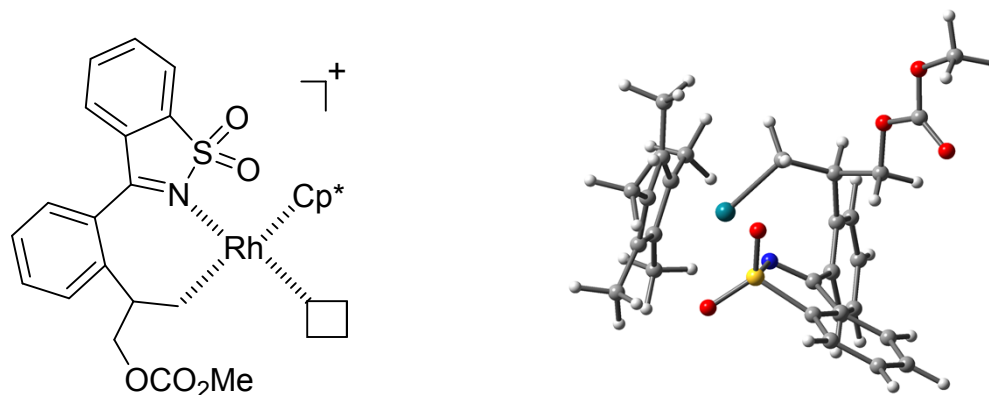

Thermal correction to Gibbs Free Energy= 0.467879

E(sof) = -2024.32468 A.U.

Standard orientation:

---

| Center Number | Atomic Number | Atomic Type | Coordinates (Angstroms) |           |           |
|---------------|---------------|-------------|-------------------------|-----------|-----------|
|               |               |             | X                       | Y         | Z         |
| 1             | 45            | 0           | -1.565333               | -0.392159 | -0.133591 |
| 2             | 6             | 0           | 3.681080                | 4.201712  | -0.439625 |
| 3             | 6             | 0           | 3.742891                | 3.745091  | 0.881960  |
| 4             | 6             | 0           | 2.819028                | 2.811293  | 1.367395  |
| 5             | 6             | 0           | 1.822952                | 2.349345  | 0.503441  |
| 6             | 6             | 0           | 1.788906                | 2.814136  | -0.816409 |
| 7             | 6             | 0           | 2.694356                | 3.730456  | -1.321226 |
| 8             | 6             | 0           | 0.764888                | 1.349467  | 0.756387  |
| 9             | 7             | 0           | -0.014692               | 1.074655  | -0.248302 |
| 10            | 16            | 0           | 0.458549                | 1.982546  | -1.682568 |
| 11            | 8             | 0           | -0.639578               | 2.889875  | -2.013526 |
| 12            | 8             | 0           | 0.957011                | 1.035797  | -2.676270 |
| 13            | 6             | 0           | 0.511499                | 0.673663  | 2.047460  |
| 14            | 6             | 0           | 0.432387                | -0.741521 | 2.145765  |
| 15            | 6             | 0           | 0.268322                | 1.487655  | 3.168972  |
| 16            | 6             | 0           | -0.083578               | 0.924942  | 4.393975  |
| 17            | 6             | 0           | -0.177289               | -0.464289 | 4.505919  |
| 18            | 6             | 0           | 0.088471                | -1.273881 | 3.399928  |
| 19            | 6             | 0           | 0.025053                | -1.713338 | -0.283421 |
| 20            | 6             | 0           | 0.844867                | -1.725552 | 1.035077  |
| 21            | 6             | 0           | 2.354362                | -1.576804 | 0.779546  |
| 22            | 8             | 0           | 2.756059                | -2.691961 | -0.031533 |
| 23            | 6             | 0           | 4.037287                | -2.657040 | -0.455637 |

|    |   |   |           |           |           |
|----|---|---|-----------|-----------|-----------|
| 24 | 8 | 0 | 4.826450  | -1.764822 | -0.219378 |
| 25 | 8 | 0 | 4.268757  | -3.759211 | -1.167630 |
| 26 | 6 | 0 | 5.605357  | -3.885456 | -1.700918 |
| 27 | 6 | 0 | -3.603572 | 0.642164  | -0.860187 |
| 28 | 6 | 0 | -2.966862 | -0.335833 | -1.765752 |
| 29 | 6 | 0 | -3.046503 | -1.654231 | -1.149264 |
| 30 | 6 | 0 | -3.480762 | -1.444086 | 0.186426  |
| 31 | 6 | 0 | -3.881339 | -0.020981 | 0.332665  |
| 32 | 6 | 0 | -3.873477 | 2.072765  | -1.217118 |
| 33 | 6 | 0 | -2.615636 | -0.062741 | -3.193483 |
| 34 | 6 | 0 | -2.773011 | -2.958579 | -1.832520 |
| 35 | 6 | 0 | -3.740714 | -2.494991 | 1.223114  |
| 36 | 6 | 0 | -4.484562 | 0.539607  | 1.583189  |
| 37 | 1 | 0 | 4.410914  | 4.922922  | -0.794978 |
| 38 | 1 | 0 | 4.524252  | 4.113569  | 1.539516  |
| 39 | 1 | 0 | 2.885704  | 2.447170  | 2.387580  |
| 40 | 1 | 0 | 2.651859  | 4.069275  | -2.351611 |
| 41 | 1 | 0 | 0.324450  | 2.568163  | 3.067597  |
| 42 | 1 | 0 | -0.280288 | 1.564086  | 5.249589  |
| 43 | 1 | 0 | -0.440598 | -0.919819 | 5.456429  |
| 44 | 1 | 0 | 0.048618  | -2.354350 | 3.513984  |
| 45 | 1 | 0 | 0.632441  | -1.391108 | -1.133644 |
| 46 | 1 | 0 | -0.362708 | -2.710742 | -0.498569 |
| 47 | 1 | 0 | 0.712042  | -2.718273 | 1.479407  |
| 48 | 1 | 0 | 2.593121  | -0.647549 | 0.252018  |
| 49 | 1 | 0 | 2.919132  | -1.593488 | 1.718479  |
| 50 | 1 | 0 | 5.606105  | -4.834559 | -2.235879 |
| 51 | 1 | 0 | 5.820254  | -3.057023 | -2.380132 |
| 52 | 1 | 0 | 6.336003  | -3.897437 | -0.888735 |
| 53 | 1 | 0 | -4.671394 | 2.127958  | -1.970031 |
| 54 | 1 | 0 | -2.989147 | 2.559162  | -1.638452 |
| 55 | 1 | 0 | -4.197998 | 2.652193  | -0.349046 |
| 56 | 1 | 0 | -3.514329 | -0.186457 | -3.816518 |
| 57 | 1 | 0 | -1.854758 | -0.752646 | -3.567350 |
| 58 | 1 | 0 | -2.254399 | 0.958665  | -3.335386 |
| 59 | 1 | 0 | -2.530370 | -3.752140 | -1.120920 |
| 60 | 1 | 0 | -1.949061 | -2.881326 | -2.547629 |
| 61 | 1 | 0 | -3.664701 | -3.277072 | -2.389591 |
| 62 | 1 | 0 | -4.803692 | -2.775074 | 1.216771  |
| 63 | 1 | 0 | -3.506444 | -2.136968 | 2.230450  |
| 64 | 1 | 0 | -3.159067 | -3.402190 | 1.039687  |
| 65 | 1 | 0 | -5.496057 | 0.137497  | 1.731764  |
| 66 | 1 | 0 | -4.559367 | 1.628861  | 1.548946  |
| 67 | 1 | 0 | -3.900466 | 0.267250  | 2.469794  |

---

**INT4a**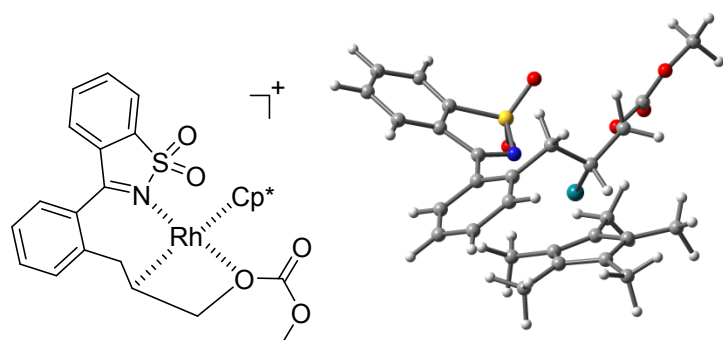

Thermal correction to Gibbs Free Energy= 0.471834

E(sof) = -2024.34131236 A.U.

Standard orientation:

---

| Center Number | Atomic Number | Atomic Type | Coordinates (Angstroms) |           |           |
|---------------|---------------|-------------|-------------------------|-----------|-----------|
|               |               |             | X                       | Y         | Z         |
| 1             | 45            | 0           | 0.977492                | 0.552780  | 0.165855  |
| 2             | 6             | 0           | -4.877636               | -3.234307 | 0.621715  |
| 3             | 6             | 0           | -5.399483               | -2.060118 | 0.066239  |
| 4             | 6             | 0           | -4.570712               | -0.973836 | -0.239411 |
| 5             | 6             | 0           | -3.203005               | -1.074532 | 0.036366  |
| 6             | 6             | 0           | -2.707290               | -2.266121 | 0.572719  |
| 7             | 6             | 0           | -3.502813               | -3.358920 | 0.872813  |
| 8             | 6             | 0           | -2.122258               | -0.088251 | -0.223913 |
| 9             | 7             | 0           | -0.911695               | -0.486111 | 0.062449  |
| 10            | 16            | 0           | -0.927525               | -2.147600 | 0.679468  |
| 11            | 8             | 0           | -0.449827               | -2.109682 | 2.059708  |
| 12            | 8             | 0           | -0.289674               | -3.013600 | -0.308324 |
| 13            | 6             | 0           | -2.374308               | 1.244572  | -0.801310 |
| 14            | 6             | 0           | -1.616244               | 1.703252  | -1.905945 |
| 15            | 6             | 0           | -3.388381               | 2.051389  | -0.250733 |
| 16            | 6             | 0           | -3.643332               | 3.320596  | -0.766102 |
| 17            | 6             | 0           | -2.902929               | 3.779650  | -1.859337 |
| 18            | 6             | 0           | -1.910361               | 2.972402  | -2.420730 |
| 19            | 6             | 0           | 0.934251                | 1.190594  | 2.437254  |
| 20            | 6             | 0           | 2.175790                | 0.590758  | 2.203163  |
| 21            | 6             | 0           | 2.828726                | 1.322869  | 1.098538  |
| 22            | 6             | 0           | 2.003190                | 2.426248  | 0.729414  |
| 23            | 6             | 0           | 0.759694                | 2.279916  | 1.458235  |
| 24            | 6             | 0           | -0.068865               | 0.835347  | 3.491001  |
| 25            | 6             | 0           | 2.788997                | -0.578444 | 2.911273  |

|    |   |   |           |           |           |
|----|---|---|-----------|-----------|-----------|
| 26 | 6 | 0 | 4.221698  | 1.041437  | 0.623597  |
| 27 | 6 | 0 | 2.363163  | 3.560141  | -0.181526 |
| 28 | 6 | 0 | -0.348056 | 3.287955  | 1.494328  |
| 29 | 6 | 0 | -0.556803 | 0.844226  | -2.558905 |
| 30 | 6 | 0 | 0.841173  | 0.933403  | -1.922907 |
| 31 | 6 | 0 | 1.766385  | -0.178277 | -2.414984 |
| 32 | 8 | 0 | 1.926000  | -1.033661 | -1.218607 |
| 33 | 6 | 0 | 2.794696  | -2.075844 | -1.157201 |
| 34 | 8 | 0 | 3.151801  | -2.539579 | -0.101488 |
| 35 | 8 | 0 | 3.162424  | -2.465189 | -2.377953 |
| 36 | 6 | 0 | 4.069394  | -3.596564 | -2.428579 |
| 37 | 1 | 0 | -5.539201 | -4.065154 | 0.848081  |
| 38 | 1 | 0 | -6.463292 | -1.992511 | -0.140532 |
| 39 | 1 | 0 | -4.985053 | -0.081458 | -0.695566 |
| 40 | 1 | 0 | -3.083949 | -4.274578 | 1.278547  |
| 41 | 1 | 0 | -3.955957 | 1.695882  | 0.604766  |
| 42 | 1 | 0 | -4.416881 | 3.941466  | -0.323812 |
| 43 | 1 | 0 | -3.106019 | 4.759519  | -2.282626 |
| 44 | 1 | 0 | -1.359957 | 3.326932  | -3.289197 |
| 45 | 1 | 0 | 0.010770  | 1.539220  | 4.331195  |
| 46 | 1 | 0 | 0.082281  | -0.174914 | 3.873929  |
| 47 | 1 | 0 | -1.094174 | 0.897986  | 3.113741  |
| 48 | 1 | 0 | 3.650197  | -0.250306 | 3.509426  |
| 49 | 1 | 0 | 3.143226  | -1.333416 | 2.201605  |
| 50 | 1 | 0 | 2.075723  | -1.061947 | 3.581800  |
| 51 | 1 | 0 | 4.947712  | 1.489799  | 1.316502  |
| 52 | 1 | 0 | 4.411594  | 1.461998  | -0.367953 |
| 53 | 1 | 0 | 4.422967  | -0.033134 | 0.592104  |
| 54 | 1 | 0 | 2.799044  | 4.381246  | 0.404020  |
| 55 | 1 | 0 | 1.487601  | 3.958520  | -0.702034 |
| 56 | 1 | 0 | 3.103321  | 3.266714  | -0.931539 |
| 57 | 1 | 0 | -0.104307 | 4.081518  | 2.215711  |
| 58 | 1 | 0 | -1.293733 | 2.840520  | 1.808778  |
| 59 | 1 | 0 | -0.505965 | 3.759846  | 0.520921  |
| 60 | 1 | 0 | -0.480480 | 1.140328  | -3.616379 |
| 61 | 1 | 0 | -0.879290 | -0.203161 | -2.564457 |
| 62 | 1 | 0 | 1.275855  | 1.919166  | -2.108149 |
| 63 | 1 | 0 | 1.353901  | -0.793144 | -3.219858 |
| 64 | 1 | 0 | 2.760436  | 0.173300  | -2.703078 |
| 65 | 1 | 0 | 4.251174  | -3.762791 | -3.489507 |
| 66 | 1 | 0 | 4.996741  | -3.354283 | -1.905367 |
| 67 | 1 | 0 | 3.596958  | -4.467448 | -1.970276 |



**INT4b**

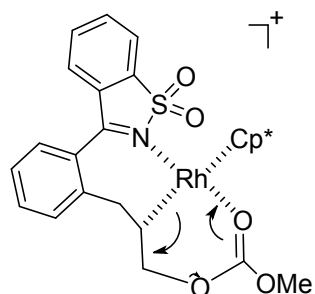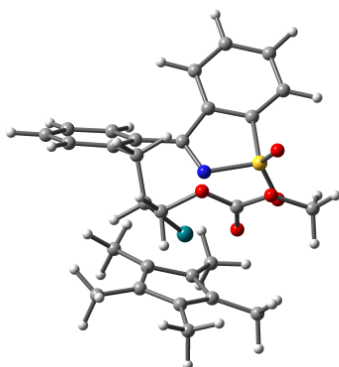

Thermal correction to Gibbs Free Energy= 0.475614

E(sof) = -2024.35632412

Standard orientation:

| Center Number | Atomic Number | Atomic Type | Coordinates (Angstroms) |           |           |
|---------------|---------------|-------------|-------------------------|-----------|-----------|
|               |               |             | X                       | Y         | Z         |
| 1             | 45            | 0           | -1.210058               | 0.208309  | -0.150051 |
| 2             | 6             | 0           | 5.395430                | -2.097904 | -0.704833 |
| 3             | 6             | 0           | 5.641434                | -0.793403 | -0.260823 |
| 4             | 6             | 0           | 4.589572                | 0.080998  | 0.037887  |
| 5             | 6             | 0           | 3.274543                | -0.365864 | -0.132538 |
| 6             | 6             | 0           | 3.061022                | -1.680192 | -0.553798 |
| 7             | 6             | 0           | 4.081793                | -2.570225 | -0.842354 |
| 8             | 6             | 0           | 1.995771                | 0.345471  | 0.140009  |
| 9             | 7             | 0           | 0.904209                | -0.358223 | -0.022123 |
| 10            | 16            | 0           | 1.308901                | -2.011276 | -0.496134 |
| 11            | 8             | 0           | 0.727753                | -2.266825 | -1.812446 |
| 12            | 8             | 0           | 1.009732                | -2.903041 | 0.625678  |
| 13            | 6             | 0           | 1.951567                | 1.742599  | 0.597906  |
| 14            | 6             | 0           | 1.134145                | 2.118447  | 1.690729  |
| 15            | 6             | 0           | 2.754572                | 2.702777  | -0.050980 |
| 16            | 6             | 0           | 2.745356                | 4.032915  | 0.358650  |
| 17            | 6             | 0           | 1.951092                | 4.410160  | 1.446179  |
| 18            | 6             | 0           | 1.164568                | 3.459406  | 2.099137  |
| 19            | 6             | 0           | -1.308083               | 0.605848  | -2.493428 |
| 20            | 6             | 0           | -2.415188               | -0.174171 | -2.149001 |
| 21            | 6             | 0           | -3.166096               | 0.545877  | -1.102914 |
| 22            | 6             | 0           | -2.551177               | 1.822148  | -0.903244 |
| 23            | 6             | 0           | -1.322087               | 1.819228  | -1.654154 |
| 24            | 6             | 0           | -0.277616               | 0.322774  | -3.543122 |
| 25            | 6             | 0           | -2.812958               | -1.511631 | -2.694061 |

|    |   |   |           |           |           |
|----|---|---|-----------|-----------|-----------|
| 26 | 6 | 0 | -4.487094 | 0.091601  | -0.559761 |
| 27 | 6 | 0 | -3.114034 | 2.976642  | -0.131274 |
| 28 | 6 | 0 | -0.423389 | 3.001284  | -1.861060 |
| 29 | 6 | 0 | 0.259817  | 1.135667  | 2.433926  |
| 30 | 6 | 0 | -1.142629 | 0.981984  | 1.814290  |
| 31 | 6 | 0 | -2.064119 | 0.176237  | 2.715261  |
| 32 | 8 | 0 | -1.640320 | -1.196850 | 2.967240  |
| 33 | 6 | 0 | -1.717283 | -2.055855 | 1.964280  |
| 34 | 8 | 0 | -1.807505 | -1.751949 | 0.765663  |
| 35 | 8 | 0 | -1.710937 | -3.289120 | 2.416420  |
| 36 | 6 | 0 | -1.756157 | -4.369153 | 1.447859  |
| 37 | 1 | 0 | 6.227518  | -2.758812 | -0.928397 |
| 38 | 1 | 0 | 6.665508  | -0.454945 | -0.135331 |
| 39 | 1 | 0 | 4.799505  | 1.077082  | 0.410791  |
| 40 | 1 | 0 | 3.878200  | -3.589733 | -1.154733 |
| 41 | 1 | 0 | 3.360198  | 2.410836  | -0.904039 |
| 42 | 1 | 0 | 3.355584  | 4.766239  | -0.160293 |
| 43 | 1 | 0 | 1.950690  | 5.440753  | 1.790297  |
| 44 | 1 | 0 | 0.565618  | 3.759126  | 2.955975  |
| 45 | 1 | 0 | -0.483171 | 0.925942  | -4.438453 |
| 46 | 1 | 0 | -0.267680 | -0.728832 | -3.833563 |
| 47 | 1 | 0 | 0.729953  | 0.582536  | -3.203895 |
| 48 | 1 | 0 | -3.720806 | -1.424391 | -3.306297 |
| 49 | 1 | 0 | -3.028912 | -2.219076 | -1.885814 |
| 50 | 1 | 0 | -2.026102 | -1.946494 | -3.313928 |
| 51 | 1 | 0 | -5.279603 | 0.270603  | -1.299824 |
| 52 | 1 | 0 | -4.763589 | 0.628505  | 0.351929  |
| 53 | 1 | 0 | -4.482139 | -0.979993 | -0.339296 |
| 54 | 1 | 0 | -3.752021 | 3.581584  | -0.790098 |
| 55 | 1 | 0 | -2.330394 | 3.634240  | 0.255432  |
| 56 | 1 | 0 | -3.734148 | 2.651664  | 0.709462  |
| 57 | 1 | 0 | -0.819081 | 3.634067  | -2.668747 |
| 58 | 1 | 0 | 0.585586  | 2.698002  | -2.150406 |
| 59 | 1 | 0 | -0.342267 | 3.620199  | -0.963743 |
| 60 | 1 | 0 | 0.144291  | 1.499902  | 3.466791  |
| 61 | 1 | 0 | 0.745740  | 0.158194  | 2.513468  |
| 62 | 1 | 0 | -1.596464 | 1.976996  | 1.741315  |
| 63 | 1 | 0 | -2.093733 | 0.591234  | 3.729292  |
| 64 | 1 | 0 | -3.086625 | 0.144846  | 2.325902  |
| 65 | 1 | 0 | -1.733024 | -5.275350 | 2.051375  |
| 66 | 1 | 0 | -2.685050 | -4.310912 | 0.876158  |
| 67 | 1 | 0 | -0.889248 | -4.309661 | 0.790908  |

**TS2a**

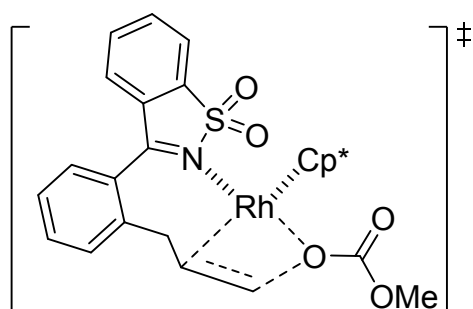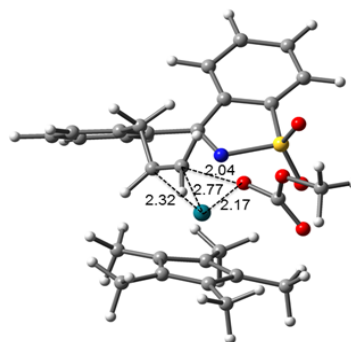

Imaginary frequency = -300.51

Thermal correction to Gibbs Free Energy=

0.470227 A.U.

E(sof) = -2024.32480847 A.U.

Standard orientation:

| Center Number | Atomic Number | Atomic Type | Coordinates (Angstroms) |           |           |
|---------------|---------------|-------------|-------------------------|-----------|-----------|
|               |               |             | X                       | Y         | Z         |
| 1             | 45            | 0           | -1.030008               | 0.522843  | -0.070564 |
| 2             | 6             | 0           | 4.843168                | -3.306134 | -0.518787 |
| 3             | 6             | 0           | 5.381095                | -2.091044 | -0.077550 |
| 4             | 6             | 0           | 4.558402                | -0.989640 | 0.185854  |
| 5             | 6             | 0           | 3.179554                | -1.119583 | -0.014680 |
| 6             | 6             | 0           | 2.669457                | -2.348428 | -0.436201 |
| 7             | 6             | 0           | 3.459166                | -3.456810 | -0.692291 |
| 8             | 6             | 0           | 2.104797                | -0.119716 | 0.216604  |
| 9             | 7             | 0           | 0.882200                | -0.543577 | 0.049276  |
| 10            | 16            | 0           | 0.884731                | -2.258616 | -0.452551 |
| 11            | 8             | 0           | 0.338390                | -2.289053 | -1.808576 |
| 12            | 8             | 0           | 0.335222                | -3.100618 | 0.600431  |
| 13            | 6             | 0           | 2.408289                | 1.270440  | 0.615264  |
| 14            | 6             | 0           | 1.775904                | 1.868576  | 1.729836  |
| 15            | 6             | 0           | 3.372938                | 1.986051  | -0.120382 |
| 16            | 6             | 0           | 3.700986                | 3.296757  | 0.221036  |
| 17            | 6             | 0           | 3.085616                | 3.892910  | 1.325013  |
| 18            | 6             | 0           | 2.142647                | 3.178382  | 2.067552  |
| 19            | 6             | 0           | -0.813891               | 1.157133  | -2.236538 |
| 20            | 6             | 0           | -2.031026               | 0.416272  | -2.116228 |
| 21            | 6             | 0           | -2.884117               | 1.127970  | -1.172951 |
| 22            | 6             | 0           | -2.190773               | 2.299774  | -0.733989 |
| 23            | 6             | 0           | -0.876829               | 2.302214  | -1.351449 |
| 24            | 6             | 0           | 0.312652                | 0.836419  | -3.167884 |

|    |   |   |           |           |           |
|----|---|---|-----------|-----------|-----------|
| 25 | 6 | 0 | -2.440429 | -0.784711 | -2.907635 |
| 26 | 6 | 0 | -4.299319 | 0.760677  | -0.859393 |
| 27 | 6 | 0 | -2.761803 | 3.394132  | 0.115284  |
| 28 | 6 | 0 | 0.099467  | 3.437589  | -1.307887 |
| 29 | 6 | 0 | 0.772563  | 1.128707  | 2.589807  |
| 30 | 6 | 0 | -0.679211 | 1.211672  | 2.116122  |
| 31 | 6 | 0 | -1.593608 | 0.284765  | 2.635687  |
| 32 | 8 | 0 | -1.765279 | -1.110894 | 1.162442  |
| 33 | 6 | 0 | -2.785511 | -1.919337 | 1.001411  |
| 34 | 8 | 0 | -3.326505 | -2.201703 | -0.060573 |
| 35 | 8 | 0 | -3.177567 | -2.422395 | 2.195364  |
| 36 | 6 | 0 | -4.233160 | -3.402960 | 2.151197  |
| 37 | 1 | 0 | 5.500559  | -4.147957 | -0.714804 |
| 38 | 1 | 0 | 6.452871  | -2.003026 | 0.072573  |
| 39 | 1 | 0 | 4.986159  | -0.063243 | 0.553303  |
| 40 | 1 | 0 | 3.029094  | -4.402738 | -1.006537 |
| 41 | 1 | 0 | 3.850501  | 1.520174  | -0.977920 |
| 42 | 1 | 0 | 4.437708  | 3.841859  | -0.361782 |
| 43 | 1 | 0 | 3.348166  | 4.906254  | 1.615879  |
| 44 | 1 | 0 | 1.691144  | 3.640128  | 2.942736  |
| 45 | 1 | 0 | 0.090121  | 1.256409  | -4.158885 |
| 46 | 1 | 0 | 0.447642  | -0.241128 | -3.282578 |
| 47 | 1 | 0 | 1.256051  | 1.275486  | -2.832780 |
| 48 | 1 | 0 | -3.098003 | -0.468752 | -3.730905 |
| 49 | 1 | 0 | -2.985451 | -1.497522 | -2.284362 |
| 50 | 1 | 0 | -1.579496 | -1.299257 | -3.337469 |
| 51 | 1 | 0 | -4.943871 | 1.078150  | -1.691685 |
| 52 | 1 | 0 | -4.662529 | 1.257849  | 0.044148  |
| 53 | 1 | 0 | -4.408856 | -0.320006 | -0.740338 |
| 54 | 1 | 0 | -3.314412 | 4.098349  | -0.522196 |
| 55 | 1 | 0 | -1.985356 | 3.965879  | 0.630312  |
| 56 | 1 | 0 | -3.464171 | 3.014414  | 0.862665  |
| 57 | 1 | 0 | -0.157792 | 4.178646  | -2.078007 |
| 58 | 1 | 0 | 1.122184  | 3.105499  | -1.496358 |
| 59 | 1 | 0 | 0.089568  | 3.948074  | -0.341756 |
| 60 | 1 | 0 | 0.831287  | 1.549533  | 3.603672  |
| 61 | 1 | 0 | 1.053341  | 0.074016  | 2.683050  |
| 62 | 1 | 0 | -1.063348 | 2.219059  | 1.959279  |
| 63 | 1 | 0 | -1.280813 | -0.520150 | 3.291974  |
| 64 | 1 | 0 | -2.656569 | 0.502765  | 2.647751  |
| 65 | 1 | 0 | -4.399700 | -3.690461 | 3.189795  |
| 66 | 1 | 0 | -5.140713 | -2.971785 | 1.720403  |
| 67 | 1 | 0 | -3.922288 | -4.266710 | 1.558463  |

**TS2b**

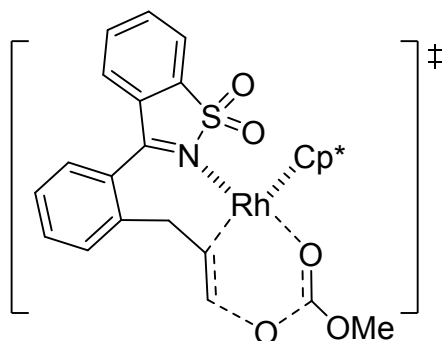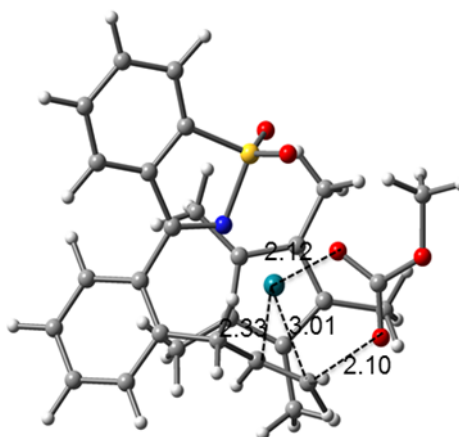

Imaginary frequency -230.40

Thermal correction to Gibbs Free Energy=

0.472103

E(sof) = -2024.32792925 A.U.

Standard orientation:

| Center Number | Atomic Number | Atomic Type | Coordinates (Angstroms) |           |           |
|---------------|---------------|-------------|-------------------------|-----------|-----------|
|               |               |             | X                       | Y         | Z         |
| 1             | 45            | 0           | 1.154948                | 0.247094  | 0.143952  |
| 2             | 6             | 0           | -5.346067               | -2.499312 | 0.362896  |
| 3             | 6             | 0           | -5.661884               | -1.175819 | 0.032528  |
| 4             | 6             | 0           | -4.658197               | -0.222281 | -0.173061 |
| 5             | 6             | 0           | -3.321733               | -0.611610 | -0.024777 |
| 6             | 6             | 0           | -3.037453               | -1.942126 | 0.281376  |
| 7             | 6             | 0           | -4.009486               | -2.909600 | 0.474445  |
| 8             | 6             | 0           | -2.083244               | 0.192393  | -0.207750 |
| 9             | 7             | 0           | -0.952003               | -0.454251 | -0.108875 |
| 10            | 16            | 0           | -1.270418               | -2.182960 | 0.196241  |
| 11            | 8             | 0           | -0.680955               | -2.502892 | 1.496345  |
| 12            | 8             | 0           | -0.960694               | -2.977871 | -0.986123 |
| 13            | 6             | 0           | -2.144568               | 1.633669  | -0.513383 |
| 14            | 6             | 0           | -1.407690               | 2.180337  | -1.588732 |
| 15            | 6             | 0           | -2.998913               | 2.455715  | 0.250115  |
| 16            | 6             | 0           | -3.124429               | 3.812826  | -0.034494 |
| 17            | 6             | 0           | -2.422127               | 4.354537  | -1.115567 |
| 18            | 6             | 0           | -1.580667               | 3.542155  | -1.877115 |
| 19            | 6             | 0           | 0.958378                | 0.690253  | 2.352146  |
| 20            | 6             | 0           | 1.984004                | -0.299885 | 2.173868  |
| 21            | 6             | 0           | 3.022676                | 0.293116  | 1.353642  |
| 22            | 6             | 0           | 2.640295                | 1.642079  | 1.049115  |

|    |   |   |           |           |           |
|----|---|---|-----------|-----------|-----------|
| 23 | 6 | 0 | 1.335058  | 1.885275  | 1.634310  |
| 24 | 6 | 0 | -0.266902 | 0.530470  | 3.195965  |
| 25 | 6 | 0 | 2.066806  | -1.648276 | 2.817998  |
| 26 | 6 | 0 | 4.324579  | -0.358806 | 1.007653  |
| 27 | 6 | 0 | 3.506663  | 2.658408  | 0.371509  |
| 28 | 6 | 0 | 0.638303  | 3.211712  | 1.700180  |
| 29 | 6 | 0 | -0.423259 | 1.377644  | -2.411516 |
| 30 | 6 | 0 | 0.990650  | 1.487579  | -1.817819 |
| 31 | 6 | 0 | 2.087302  | 1.092675  | -2.593015 |
| 32 | 8 | 0 | 3.229859  | -0.620471 | -2.149369 |
| 33 | 6 | 0 | 2.579282  | -1.601209 | -1.709396 |
| 34 | 8 | 0 | 1.587661  | -1.541757 | -0.903209 |
| 35 | 8 | 0 | 2.974815  | -2.810977 | -2.131158 |
| 36 | 6 | 0 | 2.288291  | -3.977988 | -1.629539 |
| 37 | 1 | 0 | -6.141734 | -3.222343 | 0.515873  |
| 38 | 1 | 0 | -6.702300 | -0.885049 | -0.076986 |
| 39 | 1 | 0 | -4.919404 | 0.790458  | -0.458575 |
| 40 | 1 | 0 | -3.751767 | -3.940855 | 0.694773  |
| 41 | 1 | 0 | -3.549028 | 2.031044  | 1.085021  |
| 42 | 1 | 0 | -3.773912 | 4.437847  | 0.571373  |
| 43 | 1 | 0 | -2.532010 | 5.405807  | -1.366822 |
| 44 | 1 | 0 | -1.043773 | 3.970461  | -2.720312 |
| 45 | 1 | 0 | -0.024178 | 0.785905  | 4.237038  |
| 46 | 1 | 0 | -0.636005 | -0.497430 | 3.181031  |
| 47 | 1 | 0 | -1.069787 | 1.199434  | 2.875454  |
| 48 | 1 | 0 | 2.809871  | -1.624779 | 3.627312  |
| 49 | 1 | 0 | 2.378080  | -2.415102 | 2.102781  |
| 50 | 1 | 0 | 1.110192  | -1.960287 | 3.237276  |
| 51 | 1 | 0 | 5.075787  | -0.098151 | 1.766653  |
| 52 | 1 | 0 | 4.699170  | -0.040383 | 0.032443  |
| 53 | 1 | 0 | 4.235921  | -1.447813 | 0.994452  |
| 54 | 1 | 0 | 4.080815  | 3.205627  | 1.132459  |
| 55 | 1 | 0 | 2.927416  | 3.399720  | -0.186047 |
| 56 | 1 | 0 | 4.224700  | 2.192006  | -0.307049 |
| 57 | 1 | 0 | 0.953175  | 3.758764  | 2.599948  |
| 58 | 1 | 0 | -0.448237 | 3.102366  | 1.741552  |
| 59 | 1 | 0 | 0.875619  | 3.840235  | 0.837753  |
| 60 | 1 | 0 | -0.417876 | 1.793429  | -3.427936 |
| 61 | 1 | 0 | -0.725708 | 0.331243  | -2.507012 |
| 62 | 1 | 0 | 1.157886  | 2.411630  | -1.265188 |
| 63 | 1 | 0 | 1.946819  | 0.571440  | -3.534421 |
| 64 | 1 | 0 | 3.048999  | 1.573464  | -2.472359 |
| 65 | 1 | 0 | 2.756344  | -4.816846 | -2.145245 |
| 66 | 1 | 0 | 2.431412  | -4.070677 | -0.549132 |

67 1 0 1.222040 -3.925125 -1.853087

---

### INT5

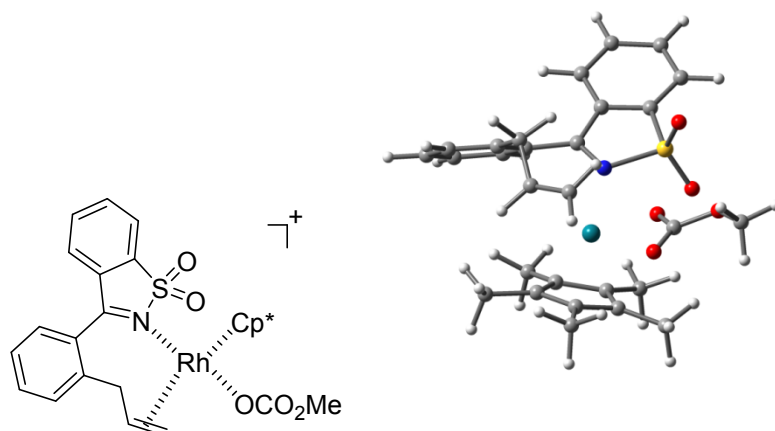

Thermal correction to Gibbs Free Energy= 0.471090

E(sof) = -2024.35564955 A.U.

Standard orientation:

---

| Center Number | Atomic Number | Atomic Type | Coordinates (Angstroms) |           |           |
|---------------|---------------|-------------|-------------------------|-----------|-----------|
|               |               |             | X                       | Y         | Z         |
| 1             | 45            | 0           | 1.103891                | 0.447624  | -0.023999 |
| 2             | 6             | 0           | -4.918702               | -3.284171 | 0.503620  |
| 3             | 6             | 0           | -5.450241               | -2.022077 | 0.209972  |
| 4             | 6             | 0           | -4.615454               | -0.923908 | -0.023375 |
| 5             | 6             | 0           | -3.228957               | -1.105716 | 0.057277  |
| 6             | 6             | 0           | -2.728363               | -2.377611 | 0.328127  |
| 7             | 6             | 0           | -3.531477               | -3.483853 | 0.551010  |
| 8             | 6             | 0           | -2.141363               | -0.115266 | -0.158423 |
| 9             | 7             | 0           | -0.918351               | -0.566678 | -0.103480 |
| 10            | 16            | 0           | -0.947168               | -2.351259 | 0.183223  |
| 11            | 8             | 0           | -0.307255               | -2.604240 | 1.469864  |
| 12            | 8             | 0           | -0.581476               | -3.048078 | -1.042341 |
| 13            | 6             | 0           | -2.464472               | 1.302232  | -0.444034 |
| 14            | 6             | 0           | -1.935268               | 1.960245  | -1.576005 |
| 15            | 6             | 0           | -3.369368               | 1.974232  | 0.399414  |
| 16            | 6             | 0           | -3.730639               | 3.296832  | 0.150684  |
| 17            | 6             | 0           | -3.212545               | 3.952093  | -0.969819 |
| 18            | 6             | 0           | -2.331984               | 3.281845  | -1.822015 |
| 19            | 6             | 0           | 1.353161                | 0.726460  | 2.183618  |
| 20            | 6             | 0           | 2.657094                | 0.578573  | 1.602544  |
| 21            | 6             | 0           | 2.844173                | 1.636239  | 0.638011  |

|    |   |   |           |           |           |
|----|---|---|-----------|-----------|-----------|
| 22 | 6 | 0 | 1.688537  | 2.521566  | 0.734745  |
| 23 | 6 | 0 | 0.773533  | 1.959484  | 1.668296  |
| 24 | 6 | 0 | 0.791317  | -0.122846 | 3.280421  |
| 25 | 6 | 0 | 3.641280  | -0.482135 | 1.967517  |
| 26 | 6 | 0 | 4.105825  | 1.908331  | -0.121686 |
| 27 | 6 | 0 | 1.569114  | 3.867031  | 0.088239  |
| 28 | 6 | 0 | -0.466786 | 2.610920  | 2.191297  |
| 29 | 6 | 0 | -0.981442 | 1.275232  | -2.534259 |
| 30 | 6 | 0 | 0.477457  | 1.459664  | -2.183719 |
| 31 | 6 | 0 | 1.434090  | 0.499402  | -2.368211 |
| 32 | 8 | 0 | 1.723531  | -1.508744 | -0.381164 |
| 33 | 6 | 0 | 2.883169  | -1.834881 | -0.884831 |
| 34 | 8 | 0 | 3.774177  | -1.071052 | -1.262510 |
| 35 | 8 | 0 | 3.001001  | -3.178943 | -0.935889 |
| 36 | 6 | 0 | 4.226333  | -3.686338 | -1.493647 |
| 37 | 1 | 0 | -5.585713 | -4.122757 | 0.680400  |
| 38 | 1 | 0 | -6.527016 | -1.894148 | 0.153475  |
| 39 | 1 | 0 | -5.042315 | 0.040844  | -0.274125 |
| 40 | 1 | 0 | -3.107942 | -4.463993 | 0.747243  |
| 41 | 1 | 0 | -3.772596 | 1.463875  | 1.269355  |
| 42 | 1 | 0 | -4.419723 | 3.806153  | 0.818027  |
| 43 | 1 | 0 | -3.504233 | 4.975394  | -1.189000 |
| 44 | 1 | 0 | -1.957825 | 3.788140  | -2.709042 |
| 45 | 1 | 0 | 1.215358  | 0.192325  | 4.244503  |
| 46 | 1 | 0 | 1.027121  | -1.178418 | 3.130956  |
| 47 | 1 | 0 | -0.295302 | -0.033467 | 3.350190  |
| 48 | 1 | 0 | 4.119841  | -0.204283 | 2.917816  |
| 49 | 1 | 0 | 4.418096  | -0.594988 | 1.210663  |
| 50 | 1 | 0 | 3.150991  | -1.448658 | 2.114923  |
| 51 | 1 | 0 | 4.838744  | 2.393984  | 0.537679  |
| 52 | 1 | 0 | 3.934824  | 2.578448  | -0.968957 |
| 53 | 1 | 0 | 4.535749  | 0.979675  | -0.504104 |
| 54 | 1 | 0 | 1.998639  | 4.625018  | 0.758463  |
| 55 | 1 | 0 | 0.528856  | 4.146009  | -0.099550 |
| 56 | 1 | 0 | 2.123530  | 3.925872  | -0.852129 |
| 57 | 1 | 0 | -0.211282 | 3.203049  | 3.081891  |
| 58 | 1 | 0 | -1.217700 | 1.878386  | 2.495220  |
| 59 | 1 | 0 | -0.920290 | 3.285421  | 1.462706  |
| 60 | 1 | 0 | -1.119342 | 1.718329  | -3.531386 |
| 61 | 1 | 0 | -1.204469 | 0.209796  | -2.638443 |
| 62 | 1 | 0 | 0.785652  | 2.487945  | -2.012372 |
| 63 | 1 | 0 | 1.154052  | -0.500110 | -2.688590 |
| 64 | 1 | 0 | 2.493740  | 0.725502  | -2.381817 |
| 65 | 1 | 0 | 4.124268  | -4.771595 | -1.459841 |



|    |   |   |          |           |           |
|----|---|---|----------|-----------|-----------|
| 66 | 1 | 0 | 4.350896 | -3.345115 | -2.524819 |
| 67 | 1 | 0 | 5.085489 | -3.363862 | -0.898878 |

**3a**

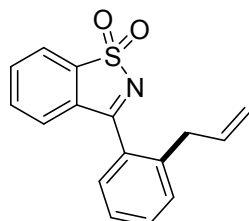

Thermal correction to Gibbs Free Energy= 0.207522

E(sof) = -1220.95241658 A.U.

Standard orientation:

| Center Number | Atomic Number | Atomic Type | Coordinates (Angstroms) |           |           |
|---------------|---------------|-------------|-------------------------|-----------|-----------|
|               |               |             | X                       | Y         | Z         |
| 1             | 6             | 0           | 3.778850                | -1.861796 | -0.750979 |
| 2             | 6             | 0           | 2.658302                | -2.693285 | -0.863347 |
| 3             | 6             | 0           | 1.376073                | -2.222499 | -0.554264 |
| 4             | 6             | 0           | 1.235436                | -0.902174 | -0.120384 |
| 5             | 6             | 0           | 2.364879                | -0.088263 | -0.032755 |
| 6             | 6             | 0           | 3.641789                | -0.529305 | -0.336082 |
| 7             | 6             | 0           | -0.001892               | -0.137557 | 0.240818  |
| 8             | 7             | 0           | 0.145701                | 1.110105  | 0.550032  |
| 9             | 16            | 0           | 1.812396                | 1.552703  | 0.461869  |
| 10            | 8             | 0           | 2.286673                | 1.888244  | 1.805280  |
| 11            | 8             | 0           | 1.985294                | 2.504585  | -0.639251 |
| 12            | 6             | 0           | -1.343990               | -0.770376 | 0.254941  |
| 13            | 6             | 0           | -2.452852               | -0.224800 | -0.431993 |
| 14            | 6             | 0           | -1.492196               | -1.957216 | 0.998382  |
| 15            | 6             | 0           | -2.721823               | -2.604081 | 1.084902  |
| 16            | 6             | 0           | -3.817967               | -2.082125 | 0.393259  |
| 17            | 6             | 0           | -3.672394               | -0.916132 | -0.356514 |
| 18            | 6             | 0           | -2.395991               | 1.050579  | -1.261182 |
| 19            | 6             | 0           | -3.109816               | 2.212003  | -0.600427 |
| 20            | 6             | 0           | -2.541585               | 3.381601  | -0.298359 |
| 21            | 1             | 0           | 4.764192                | -2.247820 | -0.996805 |
| 22            | 1             | 0           | 2.783327                | -3.718405 | -1.200642 |
| 23            | 1             | 0           | 0.511597                | -2.870032 | -0.660117 |
| 24            | 1             | 0           | 4.501420                | 0.129914  | -0.261426 |
| 25            | 1             | 0           | -0.638515               | -2.354819 | 1.540564  |

|    |   |   |           |           |           |
|----|---|---|-----------|-----------|-----------|
| 26 | 1 | 0 | -2.821664 | -3.506433 | 1.681717  |
| 27 | 1 | 0 | -4.781759 | -2.582970 | 0.434733  |
| 28 | 1 | 0 | -4.528089 | -0.524061 | -0.902097 |
| 29 | 1 | 0 | -2.883128 | 0.842585  | -2.225697 |
| 30 | 1 | 0 | -1.365591 | 1.337802  | -1.478601 |
| 31 | 1 | 0 | -4.165201 | 2.053923  | -0.372562 |
| 32 | 1 | 0 | -1.487920 | 3.572638  | -0.487817 |
| 33 | 1 | 0 | -3.111588 | 4.183607  | 0.164304  |

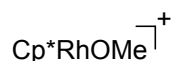

Thermal correction to Gibbs Free Energy= 0.217783

SCF Done: E(RM06L) = -614.723159263 A.U.

Standard orientation:

-----

| Center<br>Number | Atomic<br>Number | Atomic<br>Type | Coordinates (Angstroms) |           |           |
|------------------|------------------|----------------|-------------------------|-----------|-----------|
|                  |                  |                | X                       | Y         | Z         |
| 1                | 45               | 0              | -0.486831               | 0.000957  | -0.586173 |
| 2                | 6                | 0              | 0.794035                | 1.204047  | 0.710496  |
| 3                | 6                | 0              | 0.146796                | 0.148072  | 1.468433  |
| 4                | 6                | 0              | 0.604873                | -1.116726 | 0.924959  |
| 5                | 6                | 0              | 1.544078                | -0.830765 | -0.141851 |
| 6                | 6                | 0              | 1.661014                | 0.588667  | -0.269287 |
| 7                | 6                | 0              | 0.655704                | 2.671177  | 0.961059  |
| 8                | 6                | 0              | -0.734111               | 0.331296  | 2.662056  |
| 9                | 6                | 0              | 0.250848                | -2.474018 | 1.441041  |
| 10               | 6                | 0              | 2.266683                | -1.858122 | -0.955787 |
| 11               | 6                | 0              | 2.523341                | 1.323855  | -1.247923 |
| 12               | 8                | 0              | -2.257494               | 0.004043  | -1.158265 |
| 13               | 6                | 0              | -3.611154               | 0.001906  | -0.758826 |
| 14               | 1                | 0              | 1.432800                | 2.994160  | 1.668676  |
| 15               | 1                | 0              | -0.313567               | 2.923063  | 1.398531  |
| 16               | 1                | 0              | 0.782039                | 3.256407  | 0.046617  |
| 17               | 1                | 0              | -0.113780               | 0.380811  | 3.568314  |
| 18               | 1                | 0              | -1.432598               | -0.499987 | 2.786168  |
| 19               | 1                | 0              | -1.309429               | 1.258964  | 2.606590  |
| 20               | 1                | 0              | 0.980460                | -2.773856 | 2.206990  |
| 21               | 1                | 0              | 0.274237                | -3.230533 | 0.652524  |
| 22               | 1                | 0              | -0.739048               | -2.490750 | 1.903845  |
| 23               | 1                | 0              | 3.189494                | -2.156275 | -0.438781 |
| 24               | 1                | 0              | 2.550576                | -1.476103 | -1.939416 |
| 25               | 1                | 0              | 1.667055                | -2.760996 | -1.100401 |
| 26               | 1                | 0              | 3.495980                | 1.549125  | -0.788906 |

|    |   |   |           |           |           |
|----|---|---|-----------|-----------|-----------|
| 27 | 1 | 0 | 2.077205  | 2.274865  | -1.551444 |
| 28 | 1 | 0 | 2.714399  | 0.735061  | -2.148557 |
| 29 | 1 | 0 | -4.234234 | 0.141486  | -1.649902 |
| 30 | 1 | 0 | -3.864293 | -0.957492 | -0.290004 |
| 31 | 1 | 0 | -3.802607 | 0.820323  | -0.053136 |

CO<sub>2</sub>

Sum of electronic and thermal Free Energies= -188.596028

Thermal correction to Gibbs Free Energy= -0.005636

SCF Done: E(RM06L) = -188.633399100 A.U

### 1p-INT1

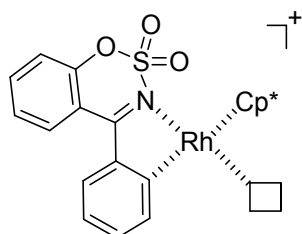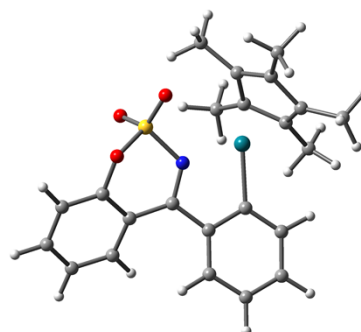

Standard orientation:

| Center Number | Atomic Number | Atomic Type | Coordinates (Angstroms) |           |           |
|---------------|---------------|-------------|-------------------------|-----------|-----------|
|               |               |             | X                       | Y         | Z         |
| 1             | 6             | 0           | -5.846446               | 0.363119  | -0.334048 |
| 2             | 6             | 0           | -5.351842               | -0.829895 | -0.879559 |
| 3             | 6             | 0           | -4.006940               | -1.154010 | -0.747365 |
| 4             | 6             | 0           | -3.119652               | -0.288670 | -0.067189 |
| 5             | 6             | 0           | -3.640920               | 0.940375  | 0.395543  |
| 6             | 6             | 0           | -4.986946               | 1.263350  | 0.297834  |
| 7             | 6             | 0           | -1.703673               | -0.580024 | 0.136892  |
| 8             | 7             | 0           | -0.816512               | 0.396954  | 0.320720  |
| 9             | 16            | 0           | -1.314889               | 2.014249  | 0.307297  |
| 10            | 8             | 0           | -1.478929               | 2.466033  | -1.065566 |
| 11            | 8             | 0           | -0.502000               | 2.741677  | 1.257353  |
| 12            | 6             | 0           | -1.104794               | -1.916123 | 0.201896  |
| 13            | 6             | 0           | 0.320549                | -1.952421 | 0.163644  |
| 14            | 45            | 0           | 1.240164                | -0.133115 | 0.185315  |
| 15            | 6             | 0           | -1.845790               | -3.091783 | 0.426214  |
| 16            | 6             | 0           | -1.191719               | -4.318769 | 0.548089  |
| 17            | 6             | 0           | 0.199930                | -4.371166 | 0.464001  |

|    |   |   |           |           |           |
|----|---|---|-----------|-----------|-----------|
| 18 | 6 | 0 | 0.944911  | -3.194327 | 0.280868  |
| 19 | 6 | 0 | 2.442917  | 1.735440  | -0.594810 |
| 20 | 6 | 0 | 2.396170  | 0.572324  | -1.491446 |
| 21 | 6 | 0 | 3.129033  | -0.523069 | -0.868673 |
| 22 | 6 | 0 | 3.427733  | -0.106722 | 0.457390  |
| 23 | 6 | 0 | 3.024879  | 1.313286  | 0.605675  |
| 24 | 6 | 0 | 1.975554  | 3.112859  | -0.953837 |
| 25 | 6 | 0 | 1.908807  | 0.602000  | -2.902897 |
| 26 | 6 | 0 | 3.570023  | -1.776081 | -1.562204 |
| 27 | 6 | 0 | 4.186764  | -0.870403 | 1.496703  |
| 28 | 6 | 0 | 3.239905  | 2.119282  | 1.847144  |
| 29 | 8 | 0 | -2.800301 | 1.854816  | 1.017162  |
| 30 | 1 | 0 | -6.899582 | 0.609737  | -0.431198 |
| 31 | 1 | 0 | -6.016937 | -1.499857 | -1.415174 |
| 32 | 1 | 0 | -3.626836 | -2.057383 | -1.209074 |
| 33 | 1 | 0 | -5.336616 | 2.212316  | 0.690607  |
| 34 | 1 | 0 | -2.921356 | -3.054970 | 0.554984  |
| 35 | 1 | 0 | -1.766657 | -5.222830 | 0.724068  |
| 36 | 1 | 0 | 0.713917  | -5.324022 | 0.561412  |
| 37 | 1 | 0 | 2.027315  | -3.270082 | 0.253123  |
| 38 | 1 | 0 | 1.089418  | 3.096211  | -1.593705 |
| 39 | 1 | 0 | 1.736501  | 3.706213  | -0.069253 |
| 40 | 1 | 0 | 2.770246  | 3.632959  | -1.506642 |
| 41 | 1 | 0 | 1.681428  | -0.399671 | -3.275706 |
| 42 | 1 | 0 | 1.017419  | 1.226267  | -3.010006 |
| 43 | 1 | 0 | 2.689788  | 1.030677  | -3.548773 |
| 44 | 1 | 0 | 4.430374  | -1.550305 | -2.206675 |
| 45 | 1 | 0 | 3.889257  | -2.545801 | -0.855695 |
| 46 | 1 | 0 | 2.784014  | -2.197732 | -2.194310 |
| 47 | 1 | 0 | 4.179269  | -1.945897 | 1.304793  |
| 48 | 1 | 0 | 5.235251  | -0.540200 | 1.508574  |
| 49 | 1 | 0 | 3.783414  | -0.700388 | 2.499735  |
| 50 | 1 | 0 | 4.294642  | 2.418588  | 1.924989  |
| 51 | 1 | 0 | 2.629230  | 3.024468  | 1.854418  |
| 52 | 1 | 0 | 3.002059  | 1.543584  | 2.747752  |

---

# <sup>1</sup>H and <sup>13</sup>C NMR Spectra

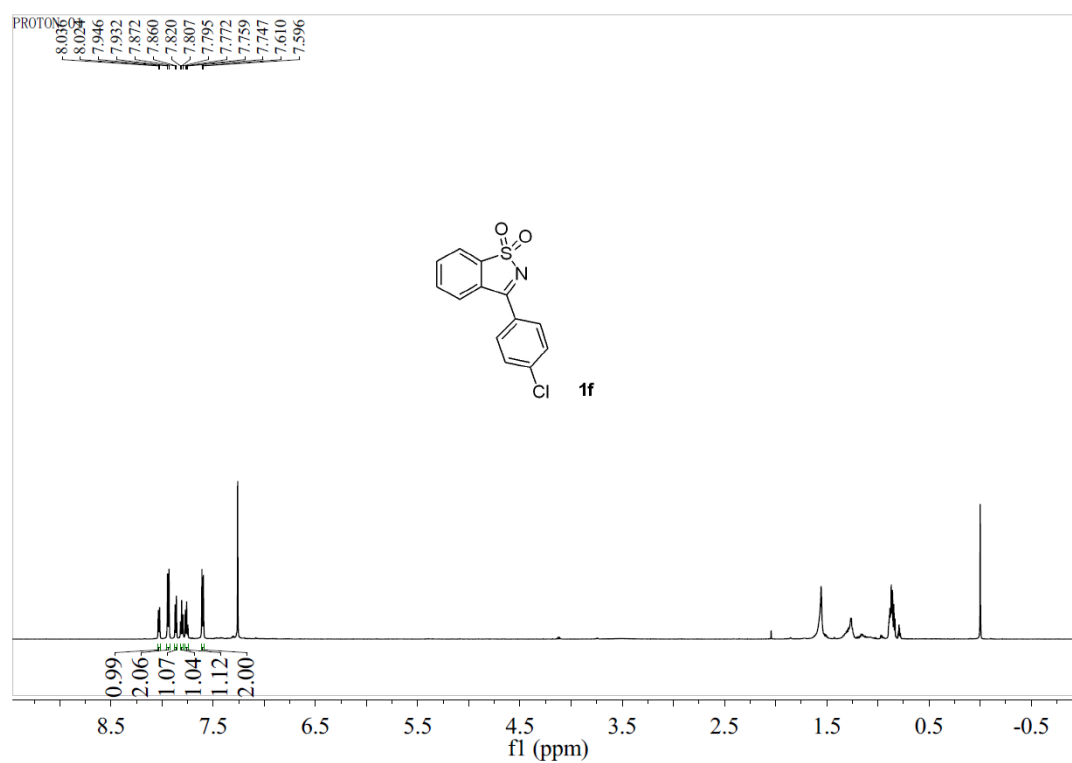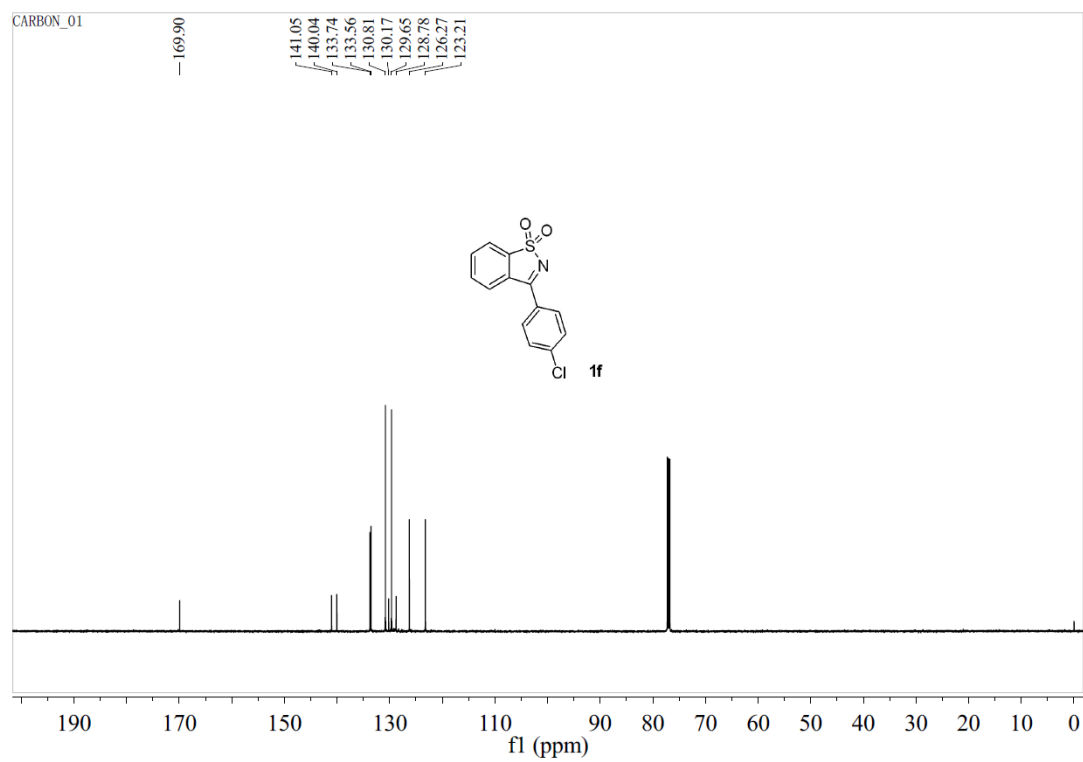

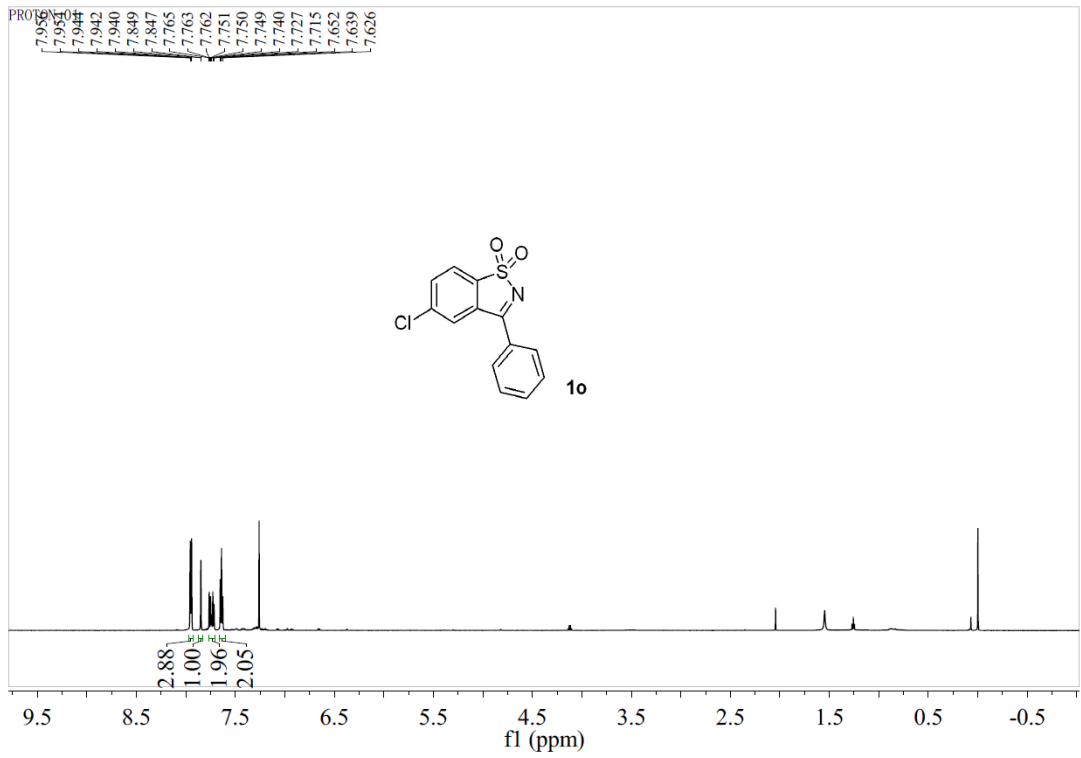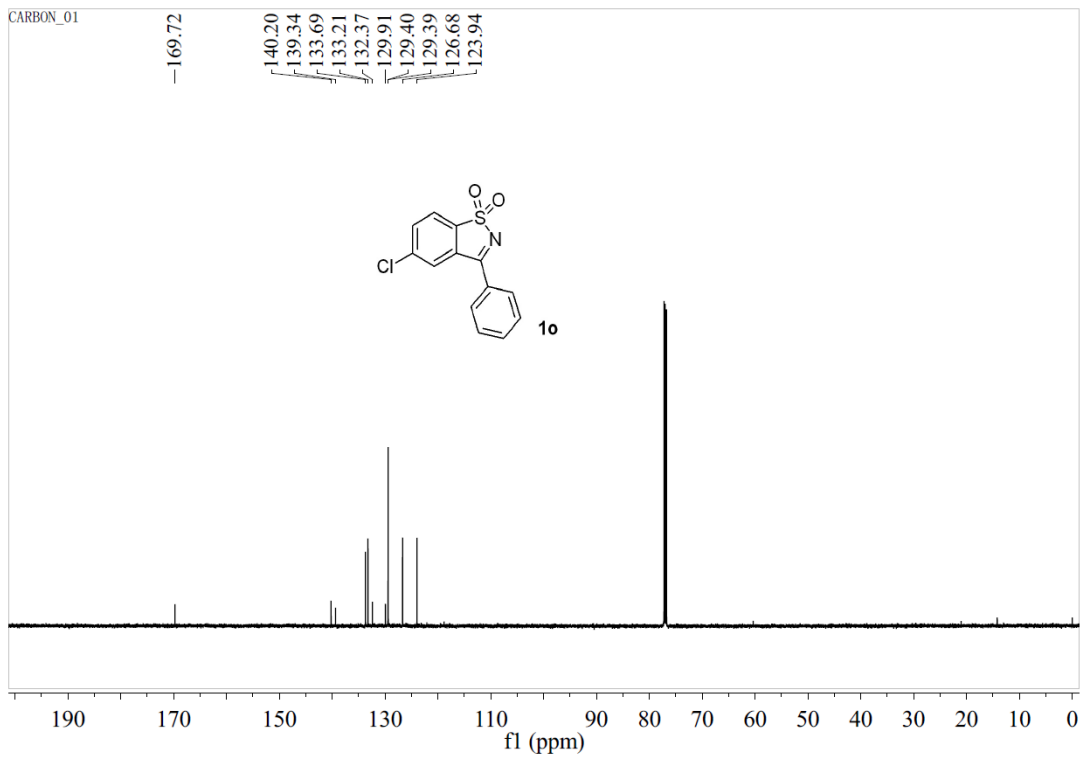

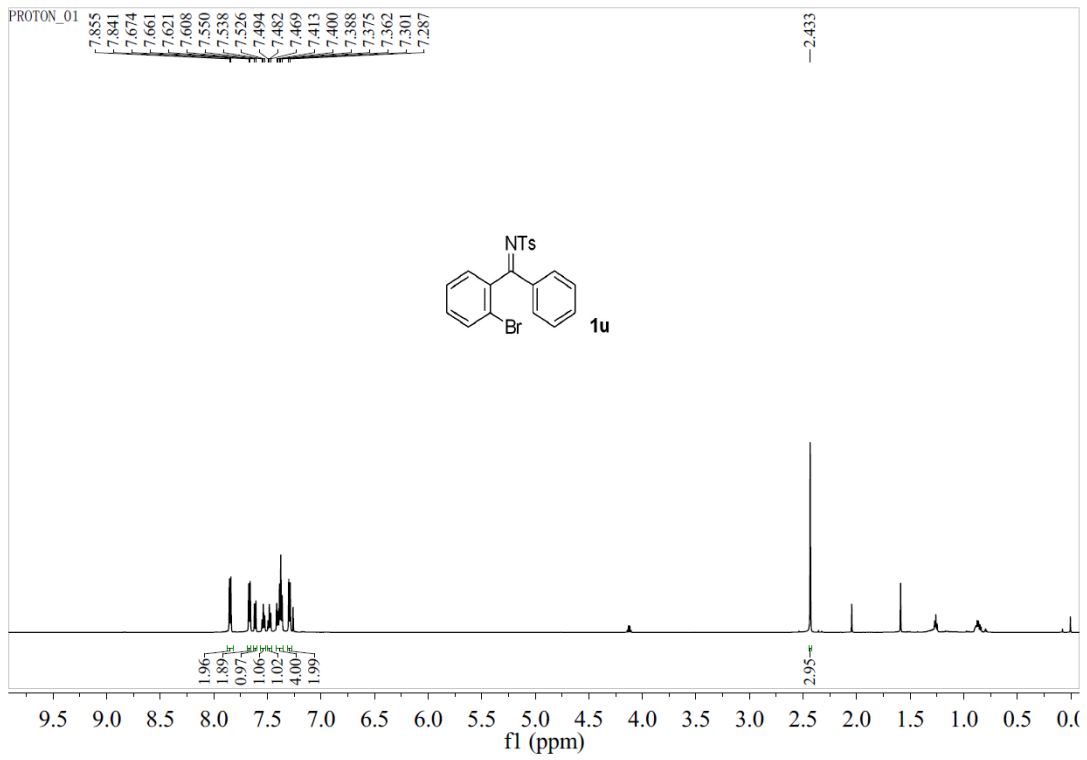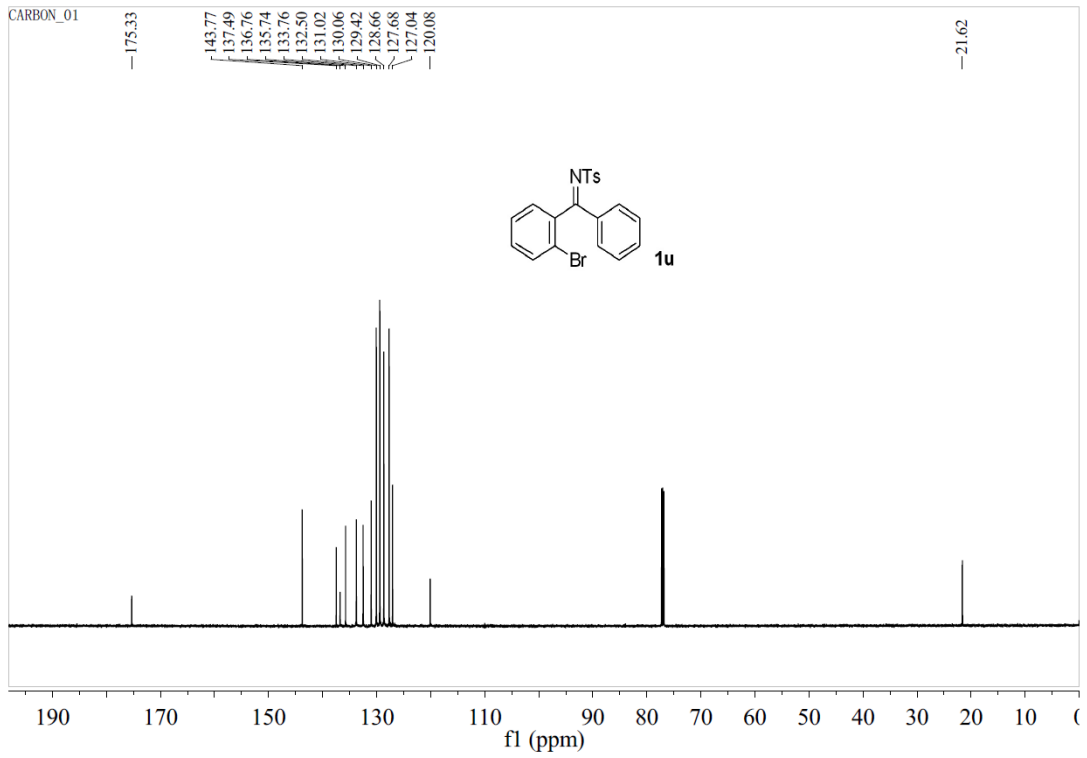

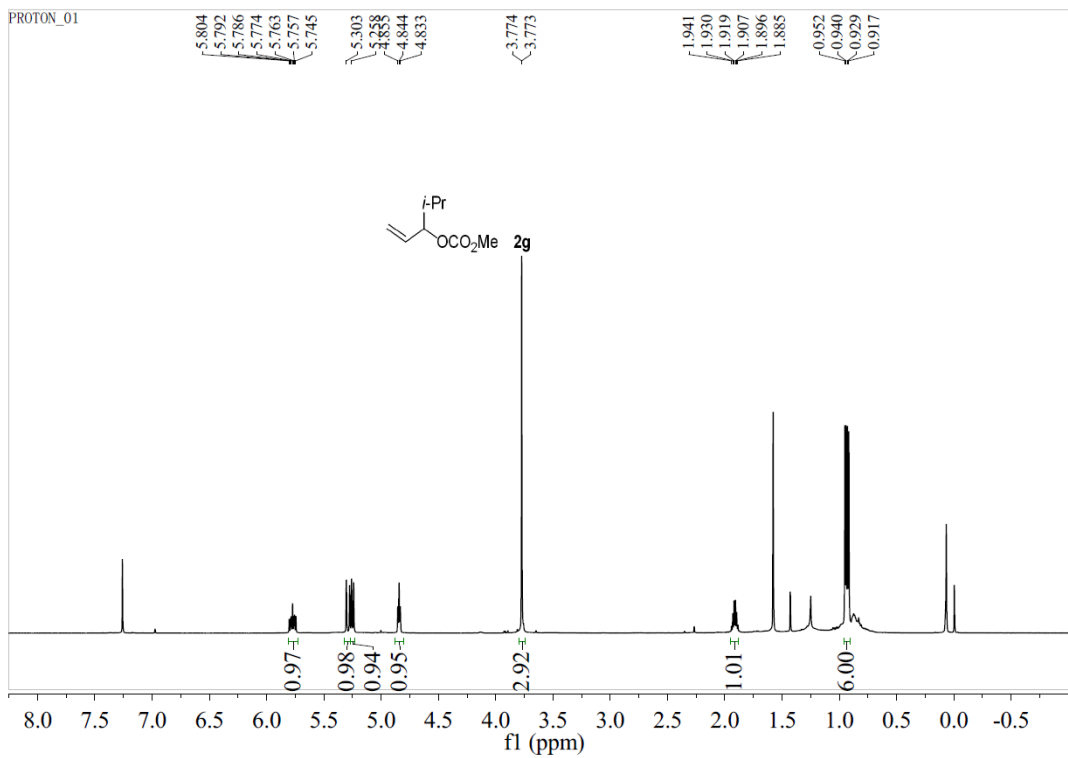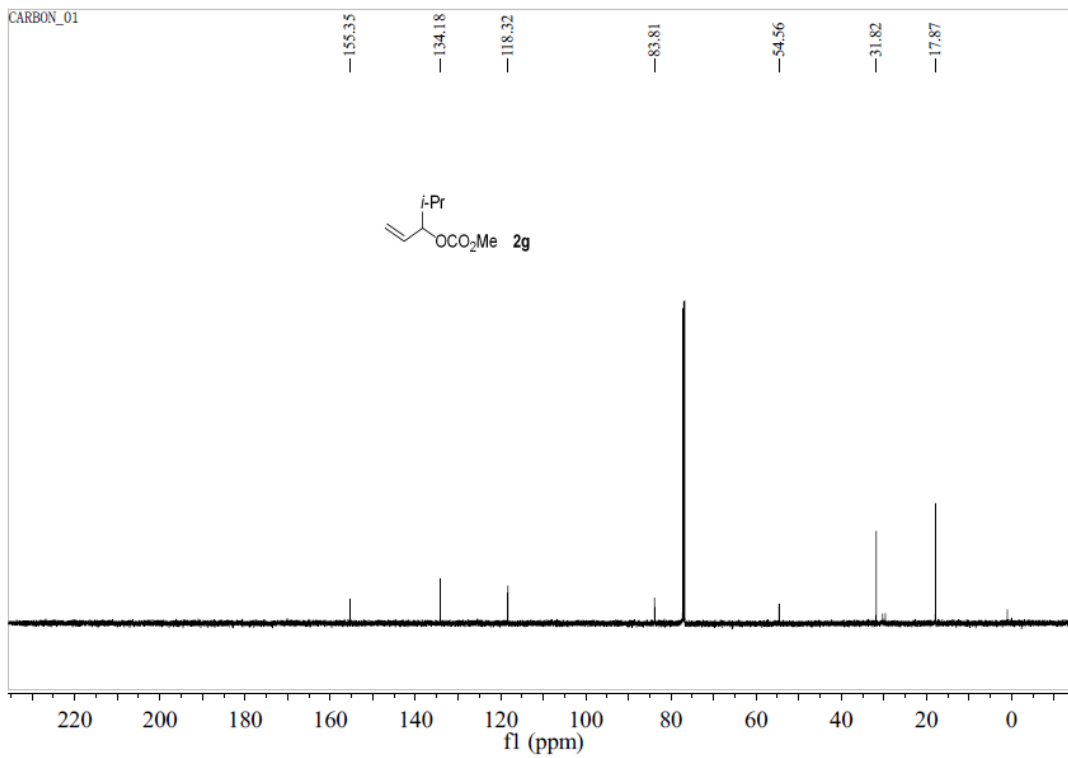



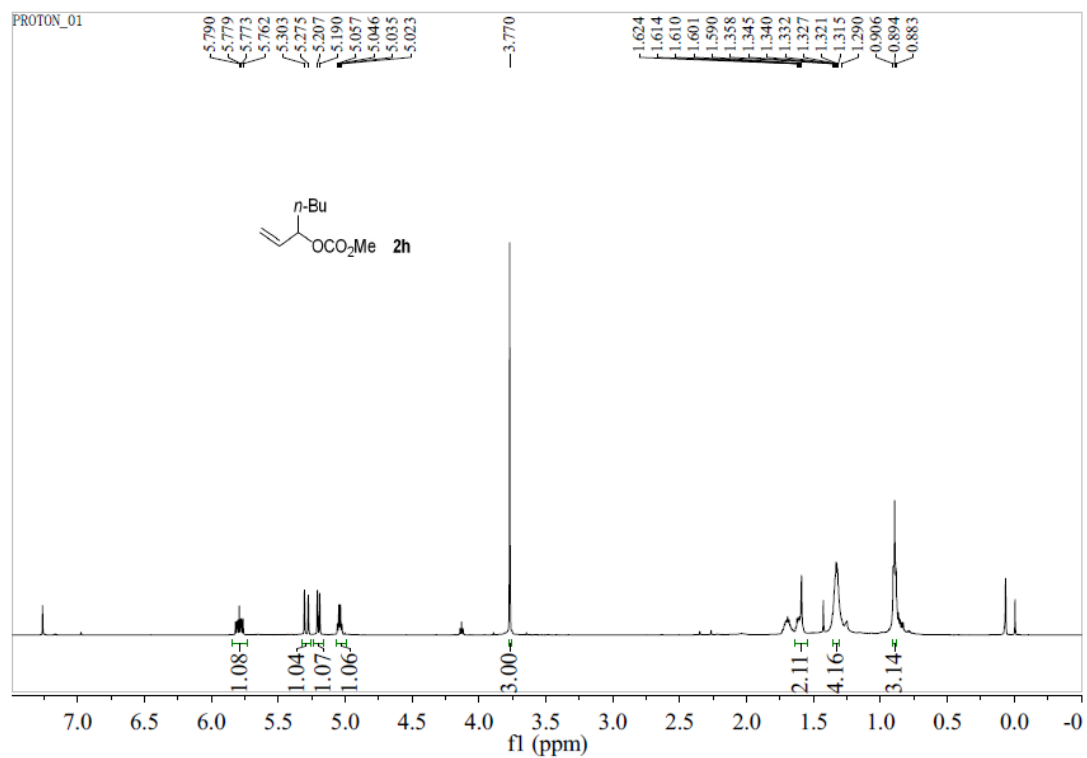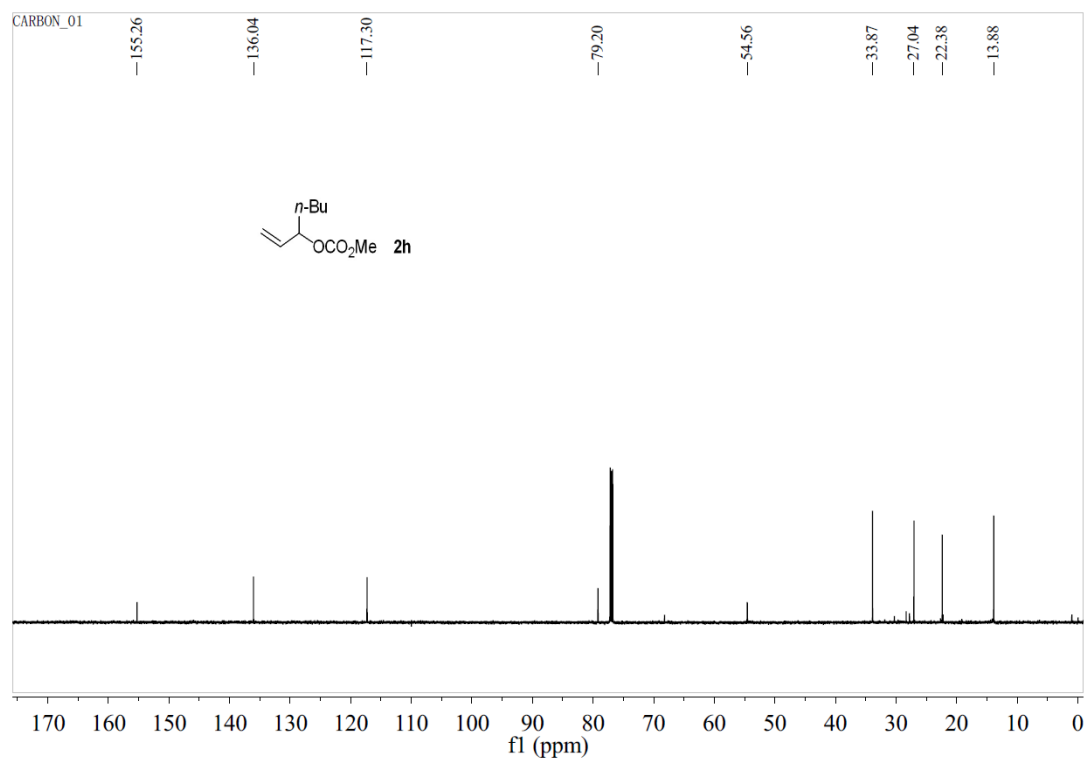

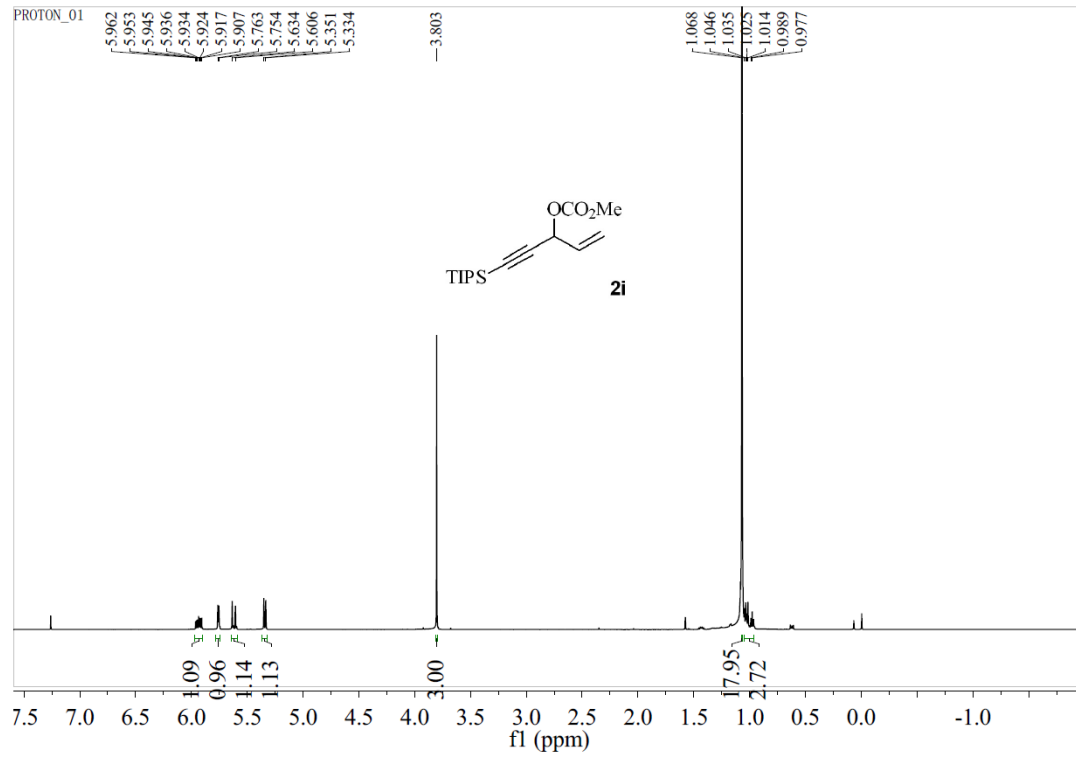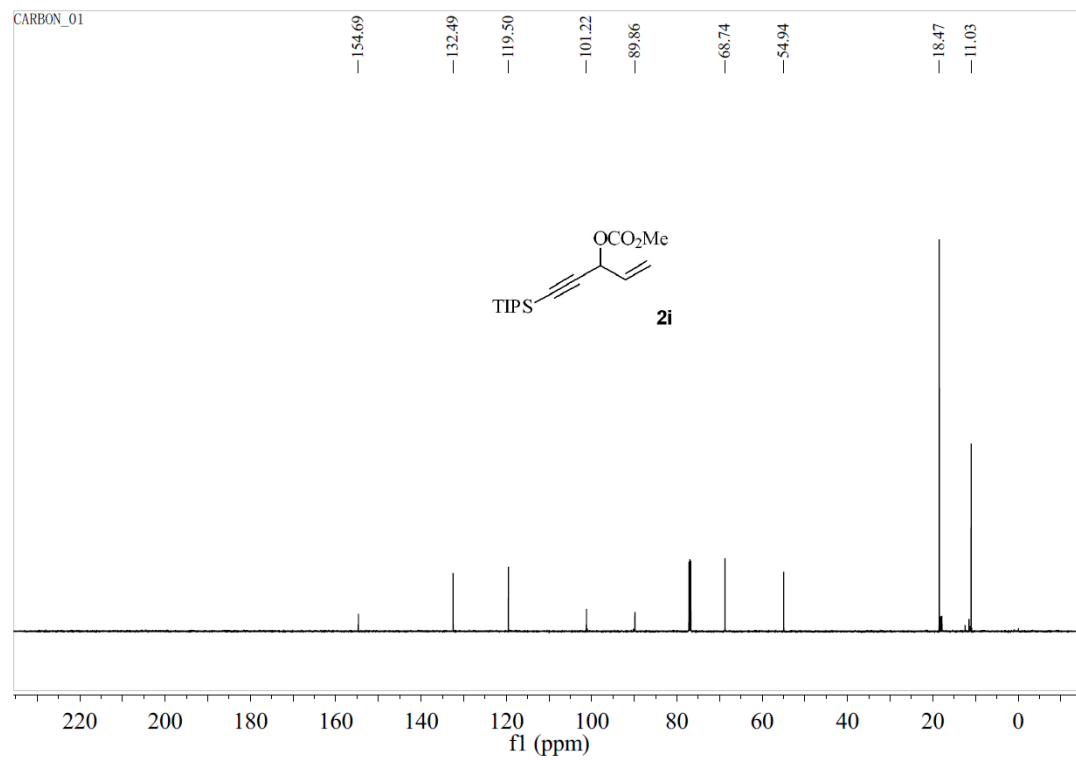

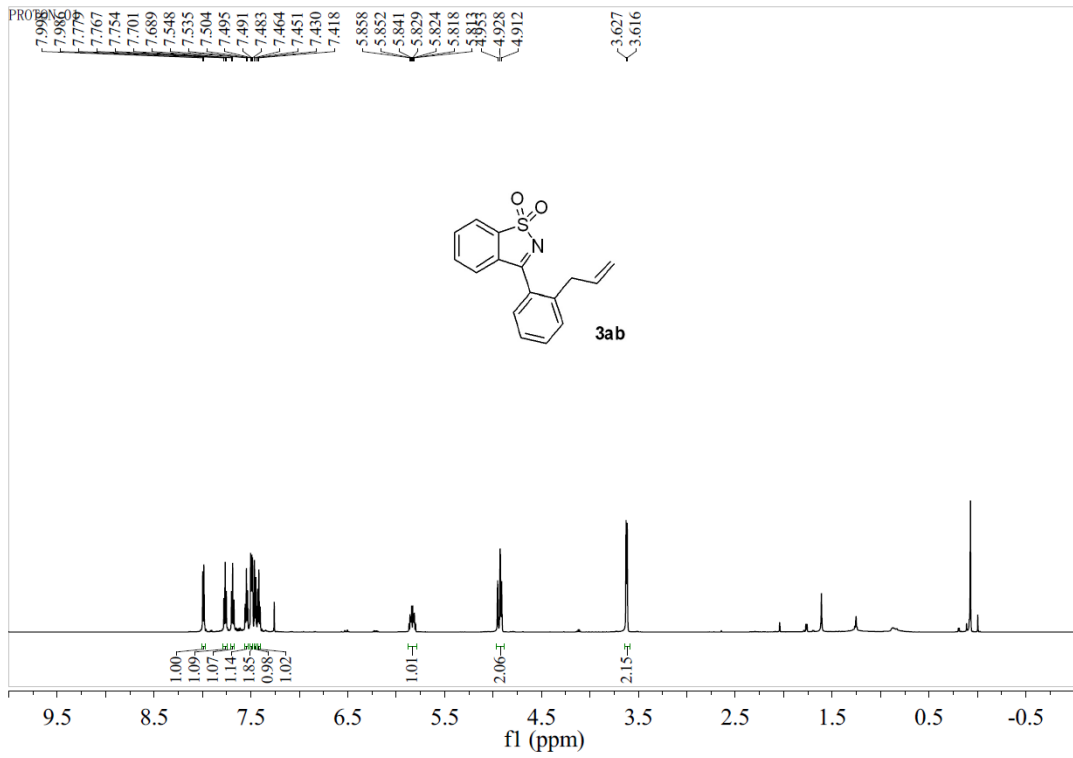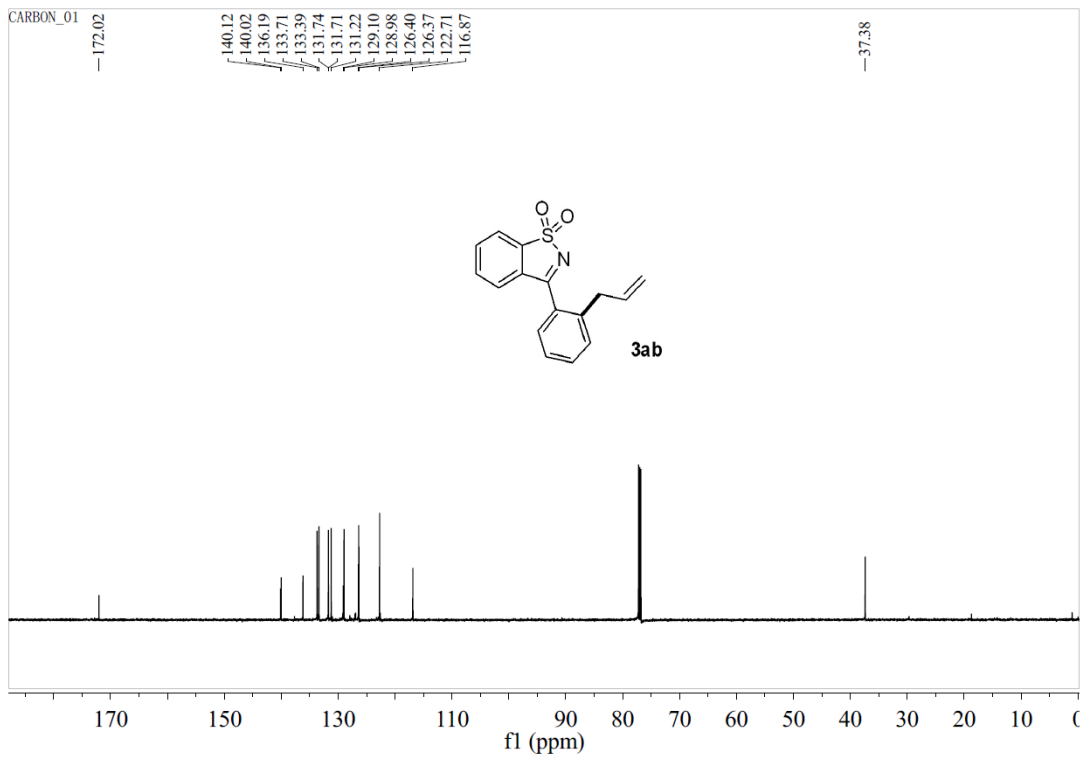

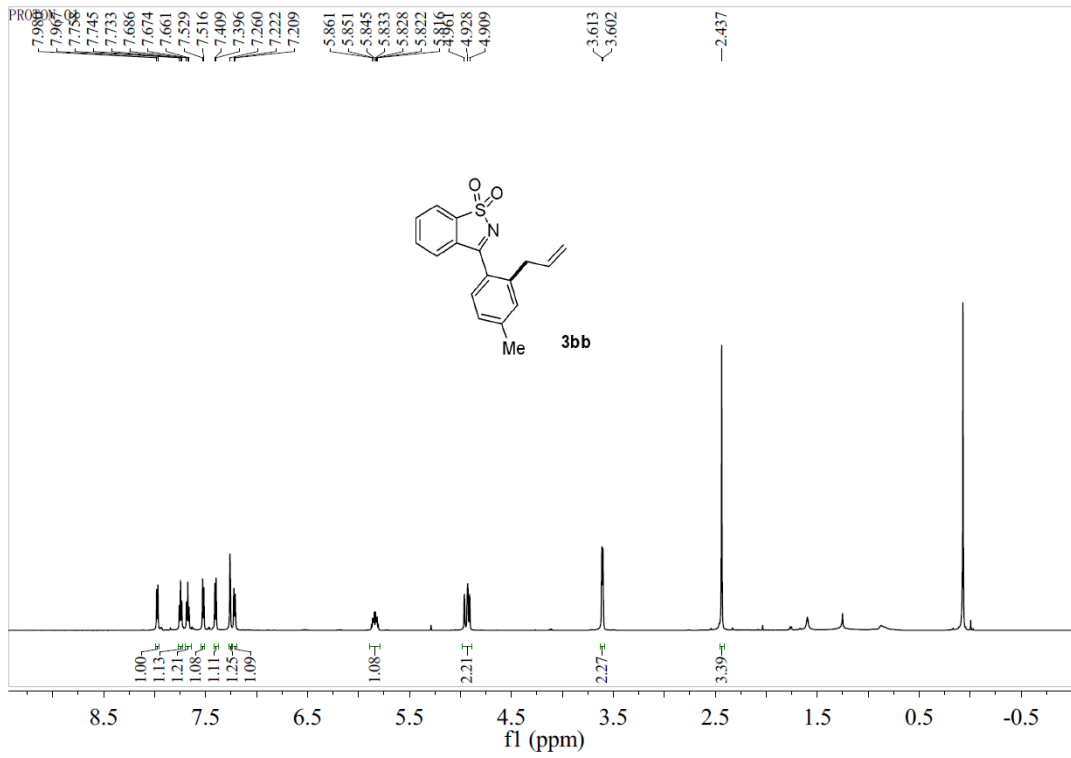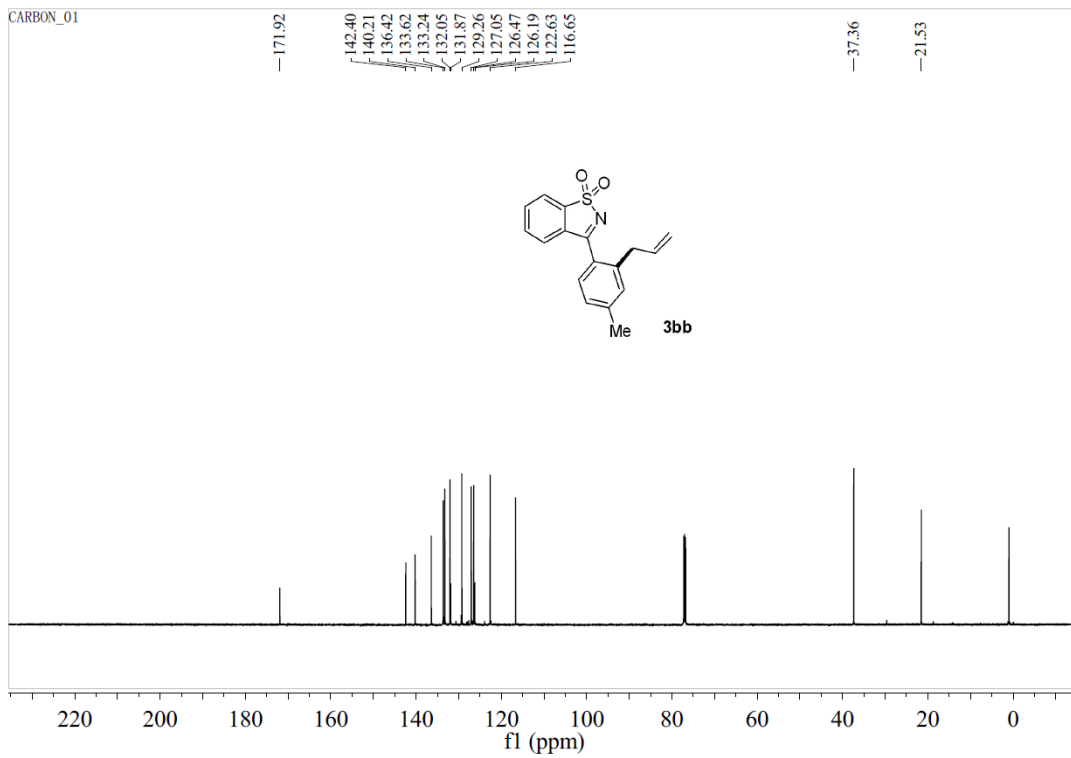

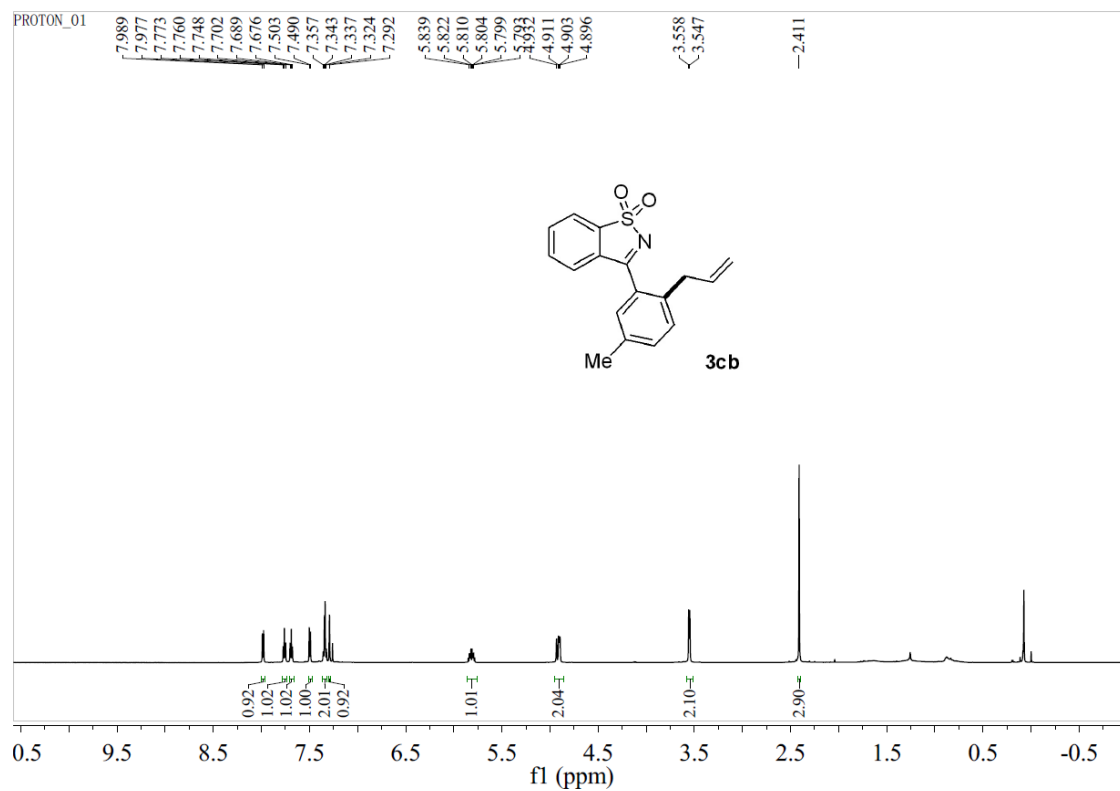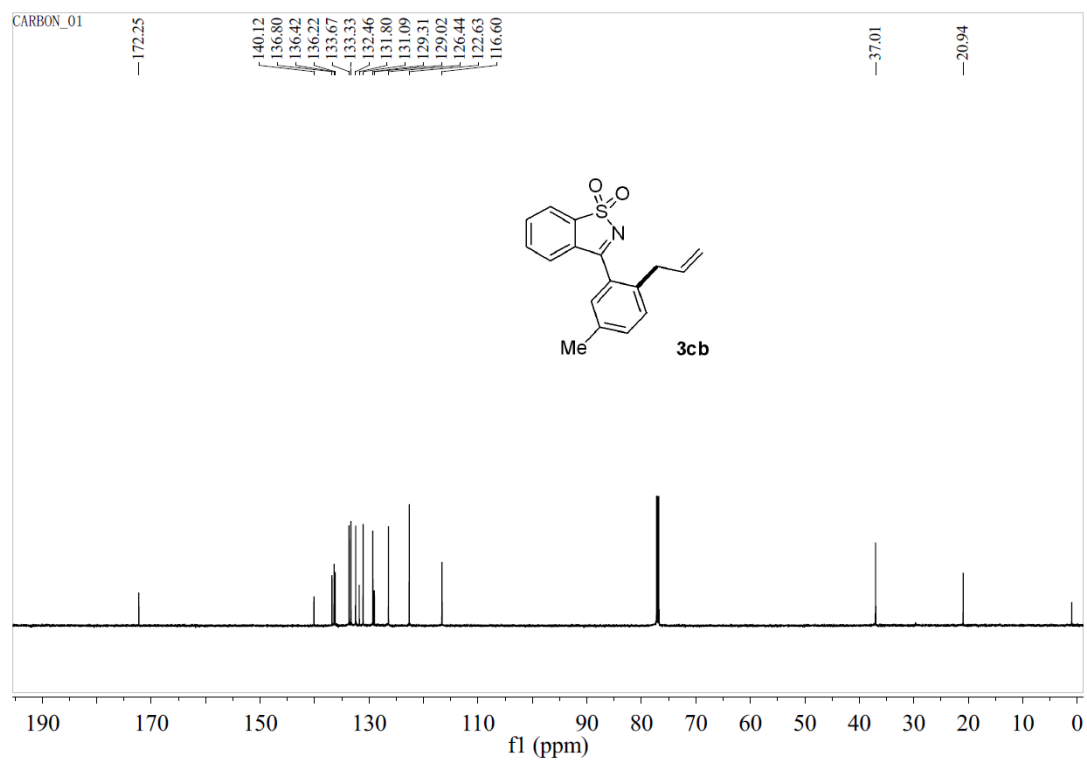

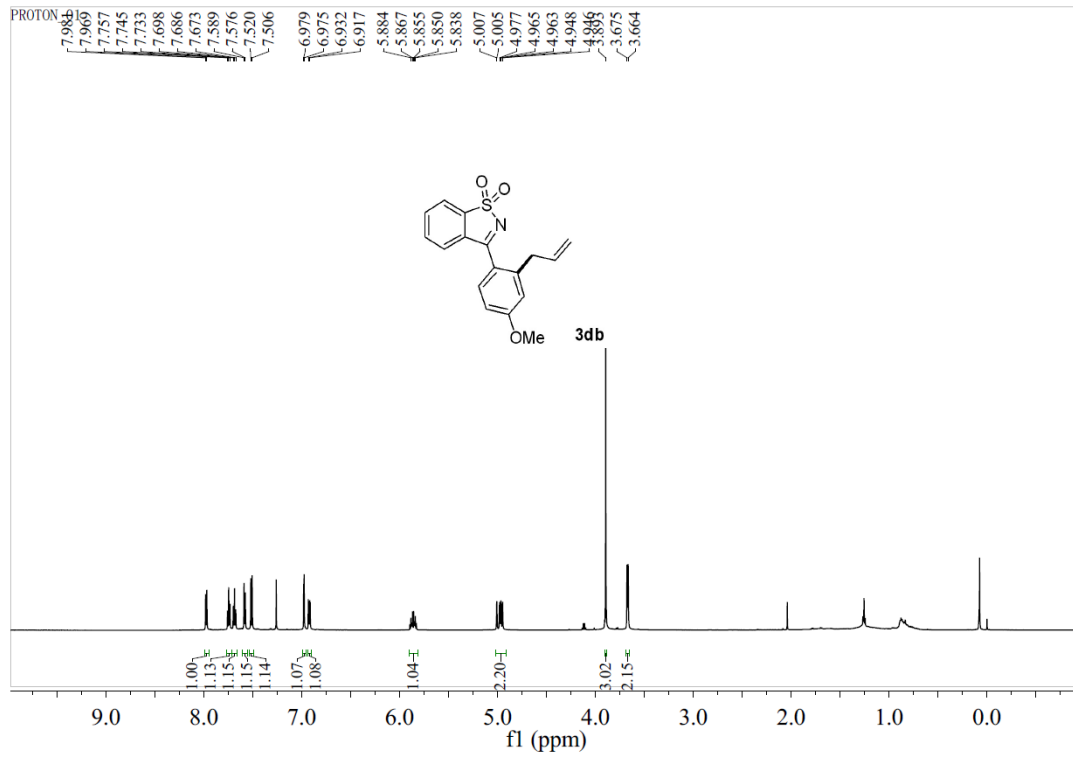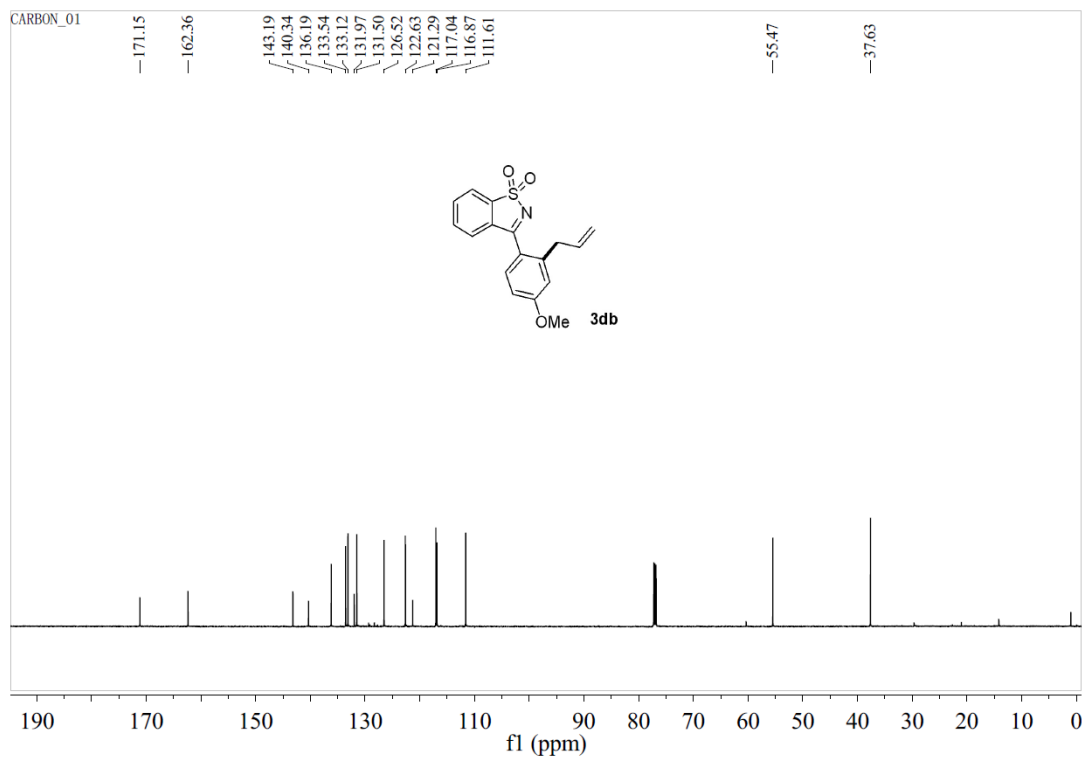

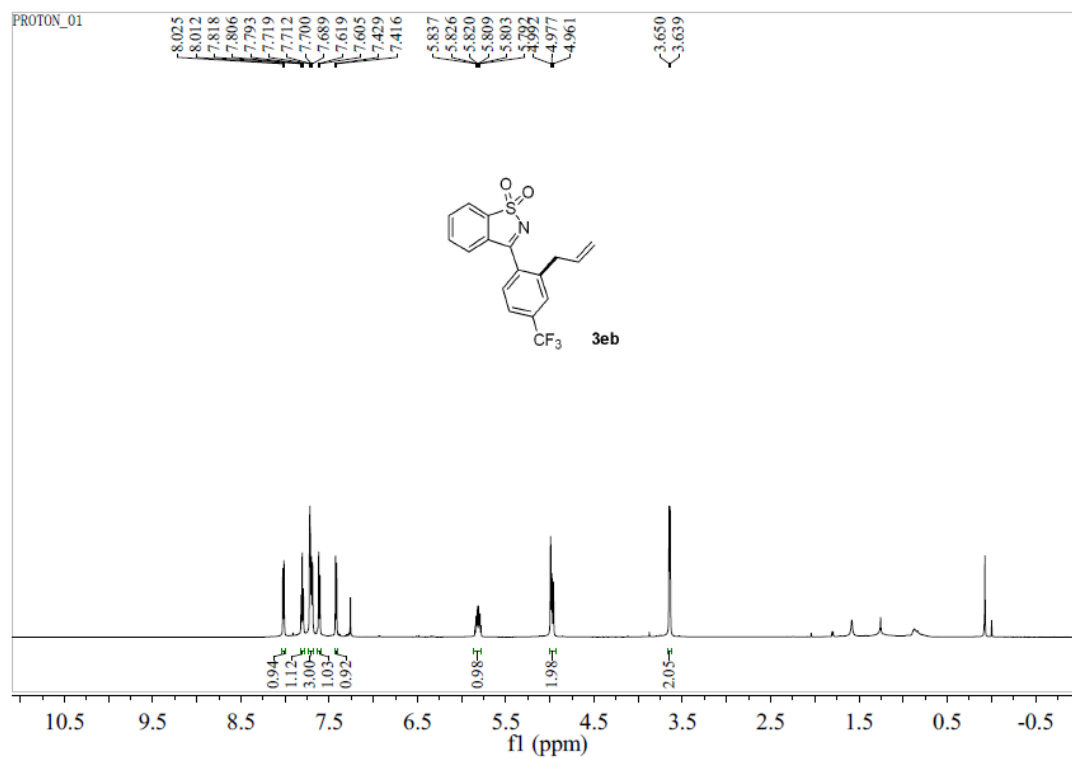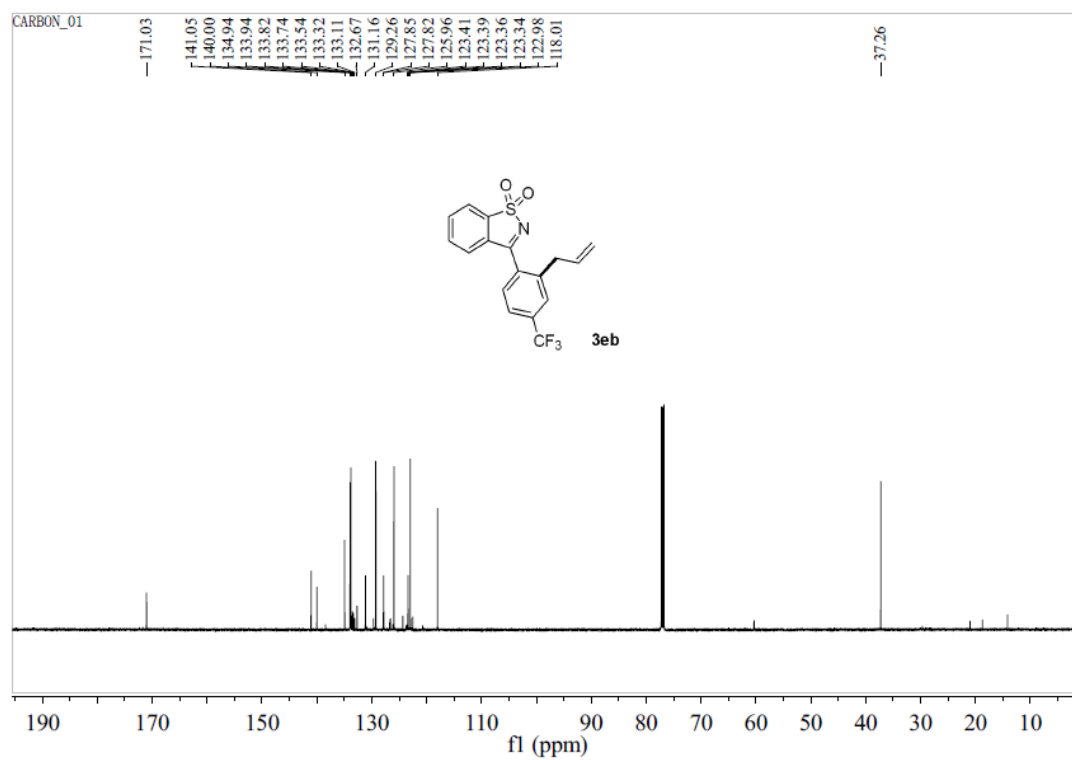

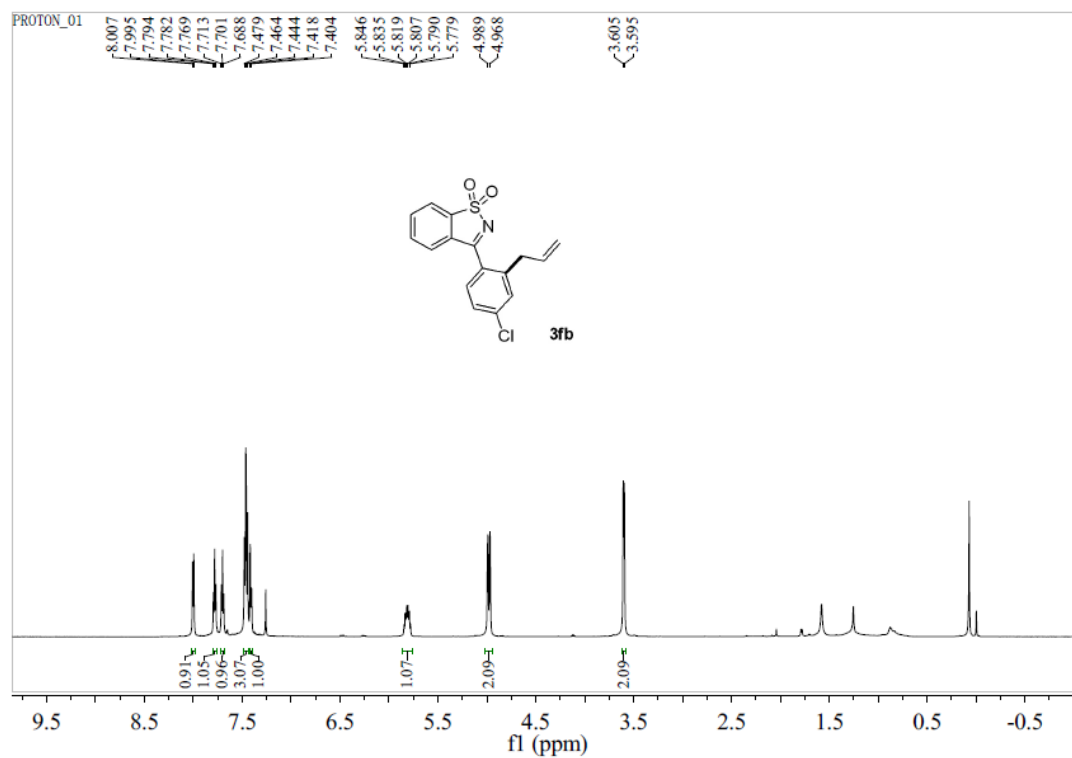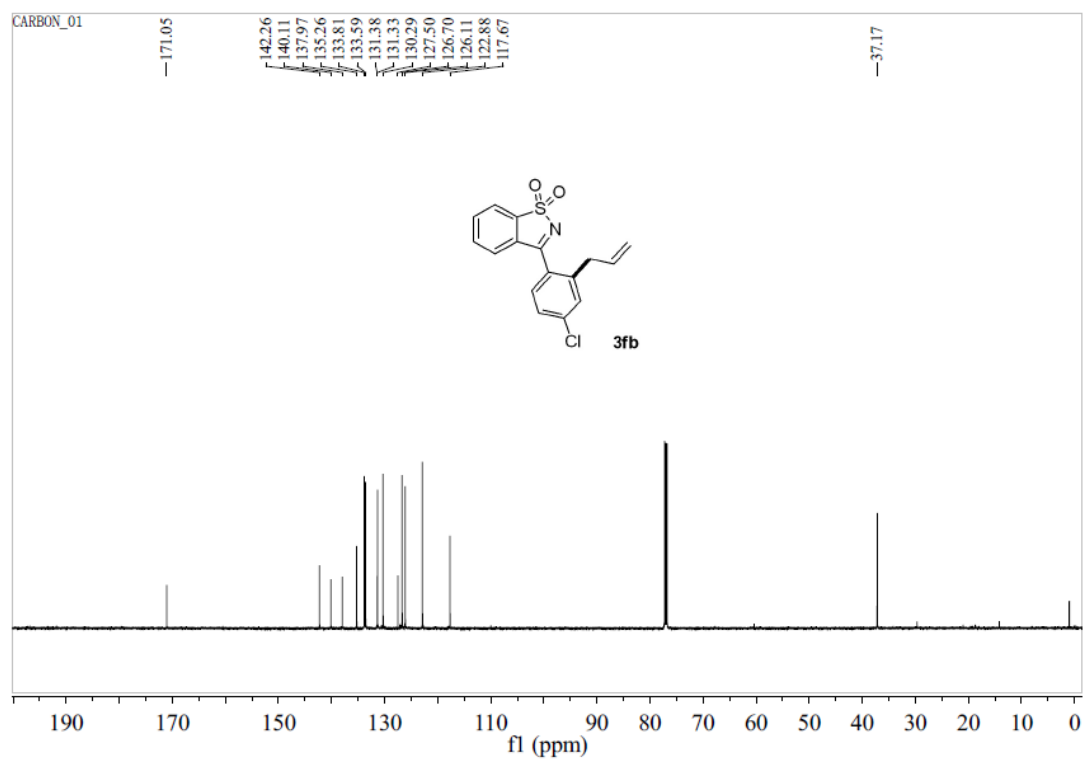



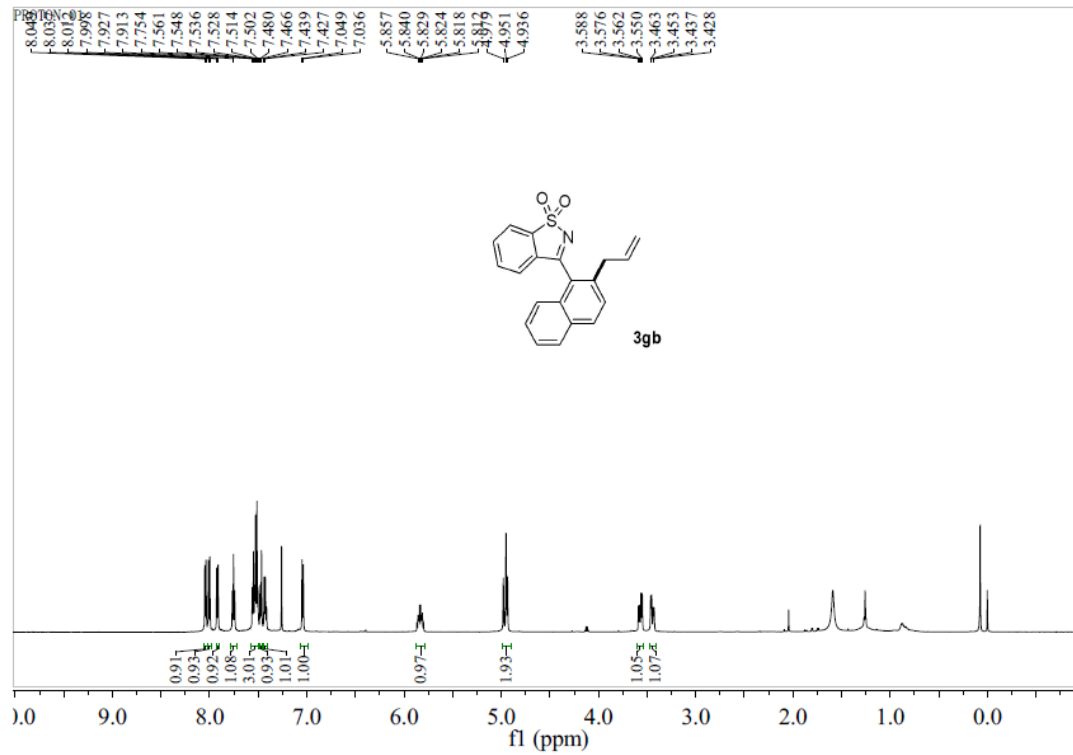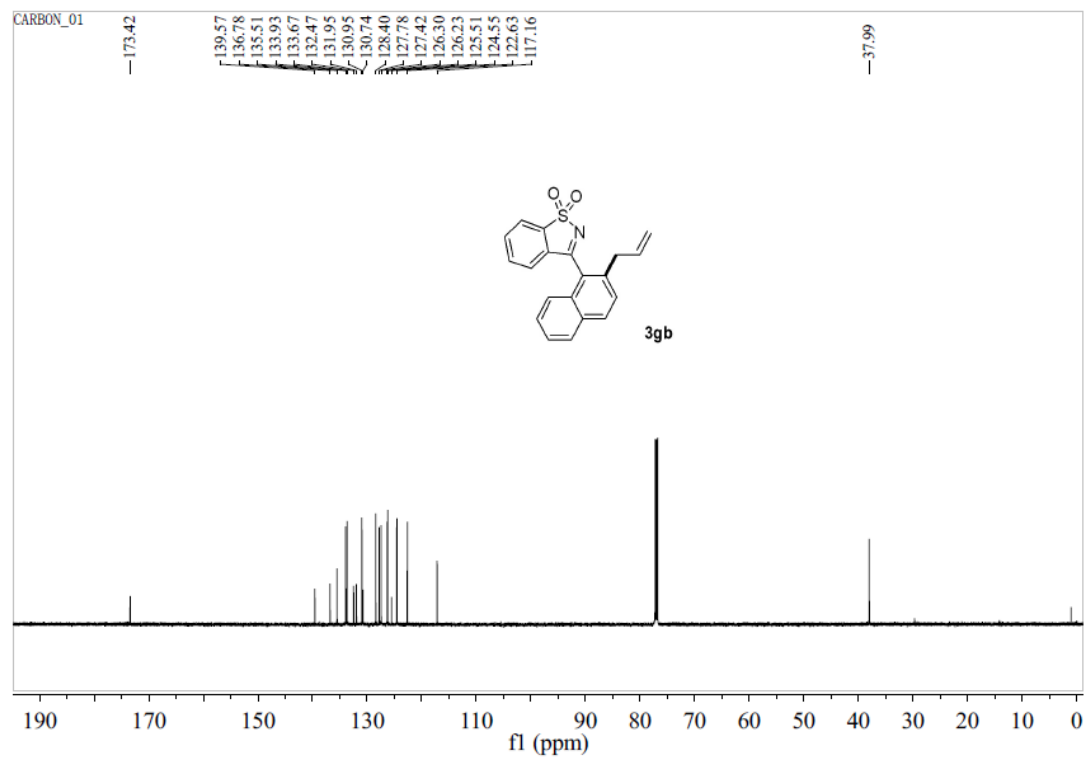

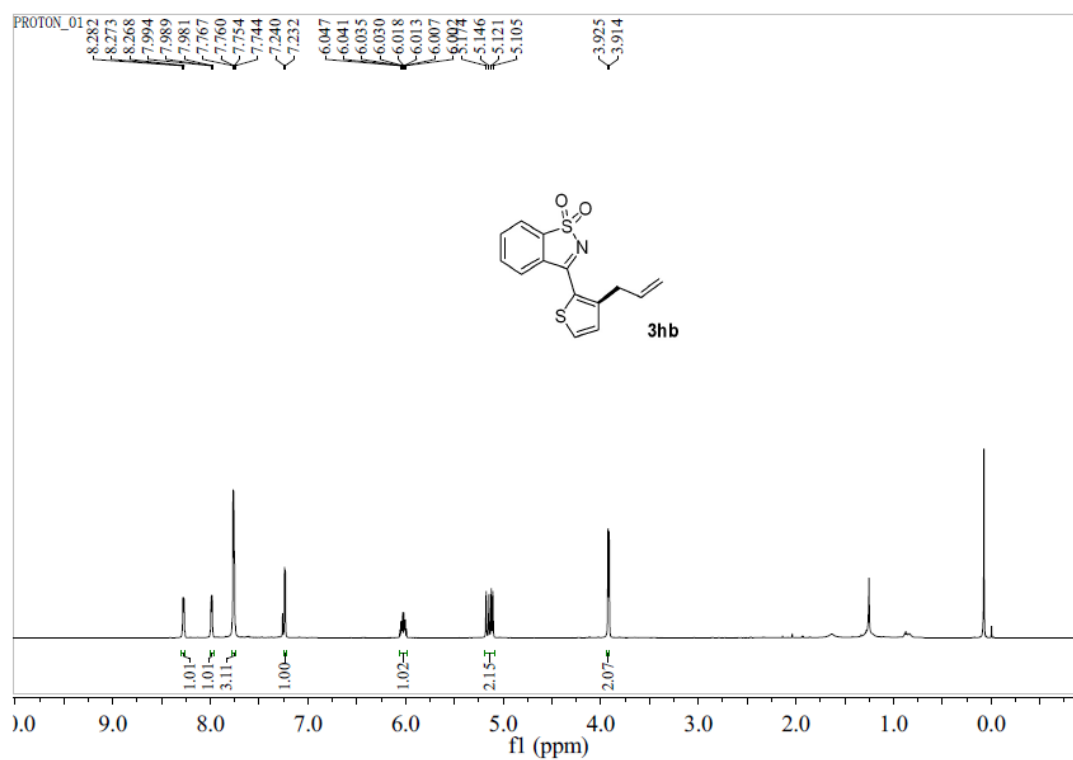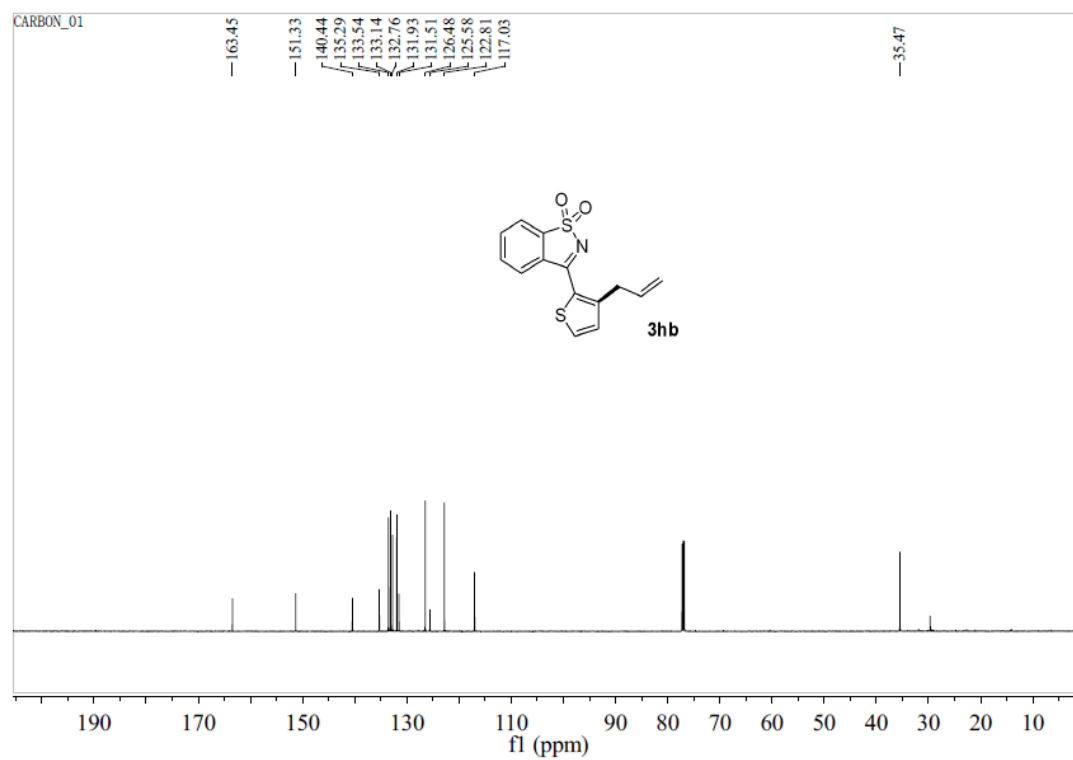

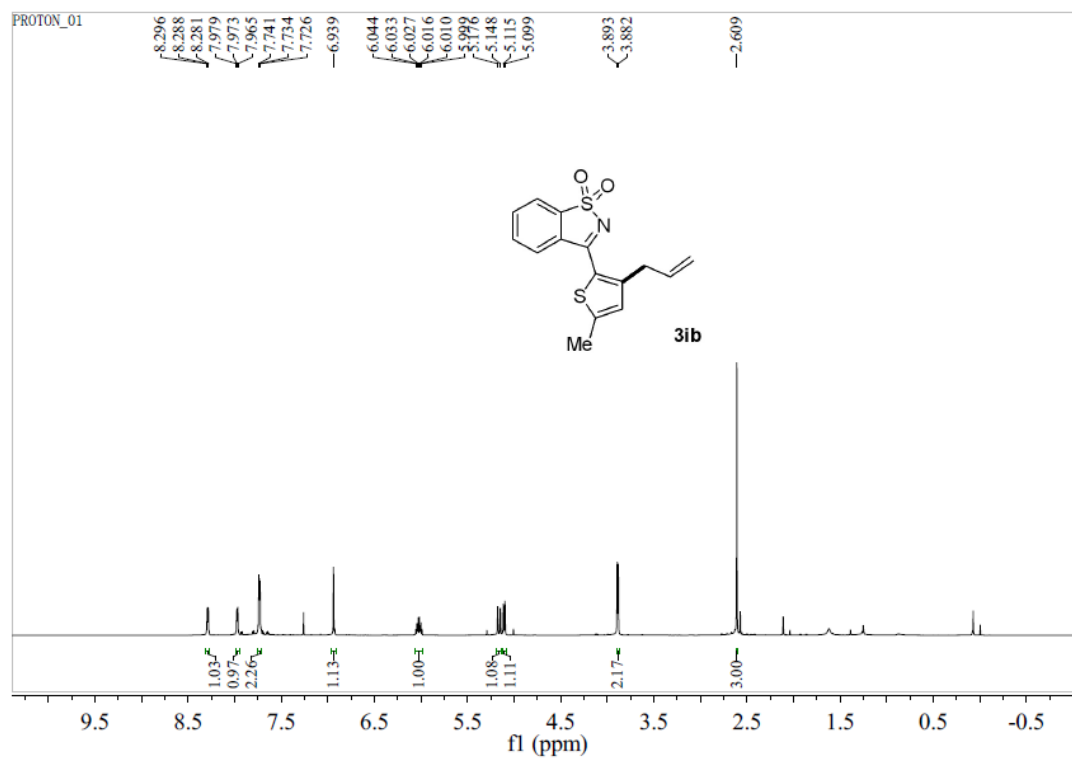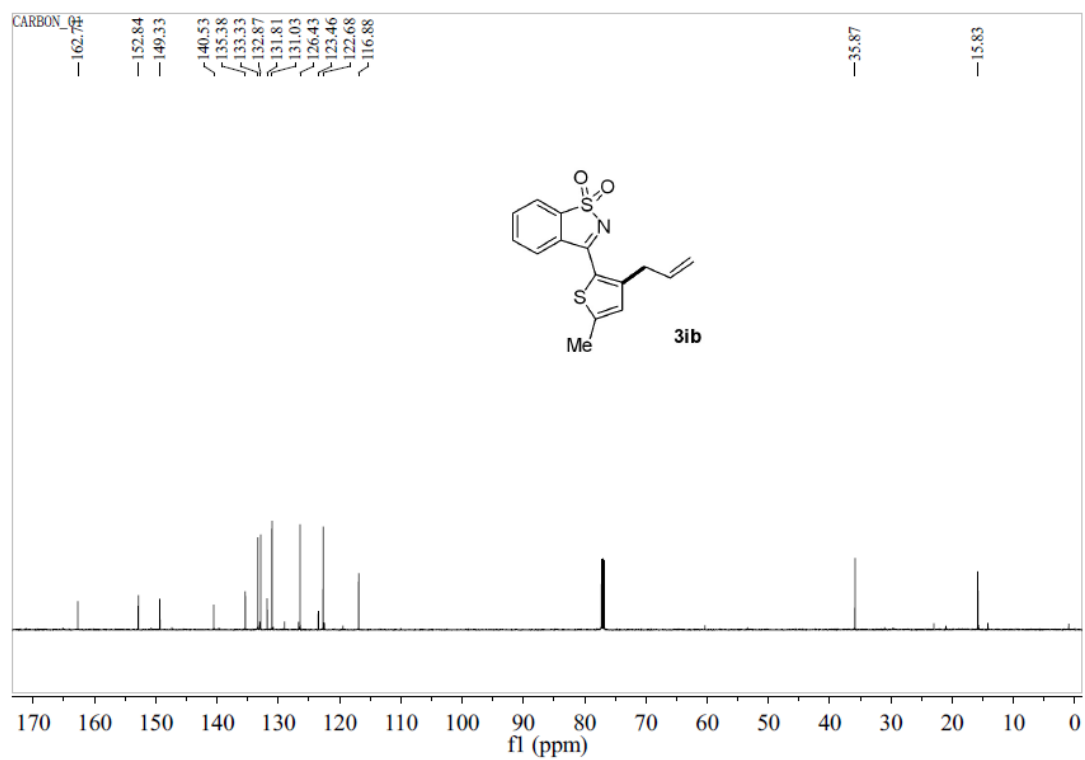

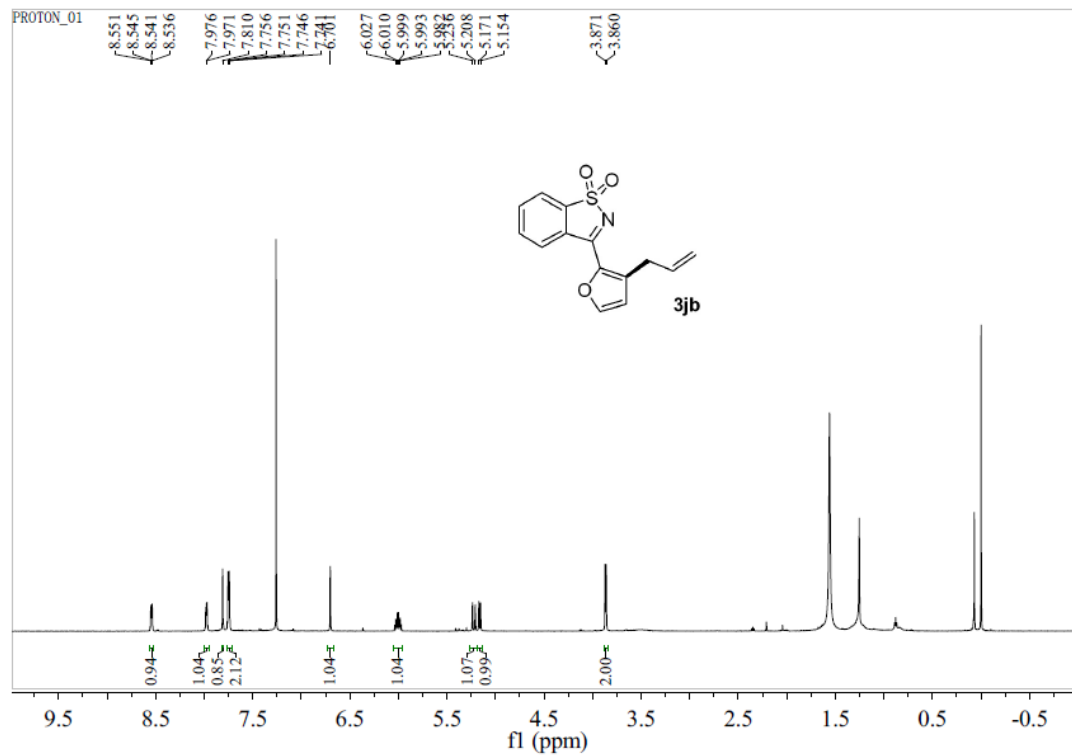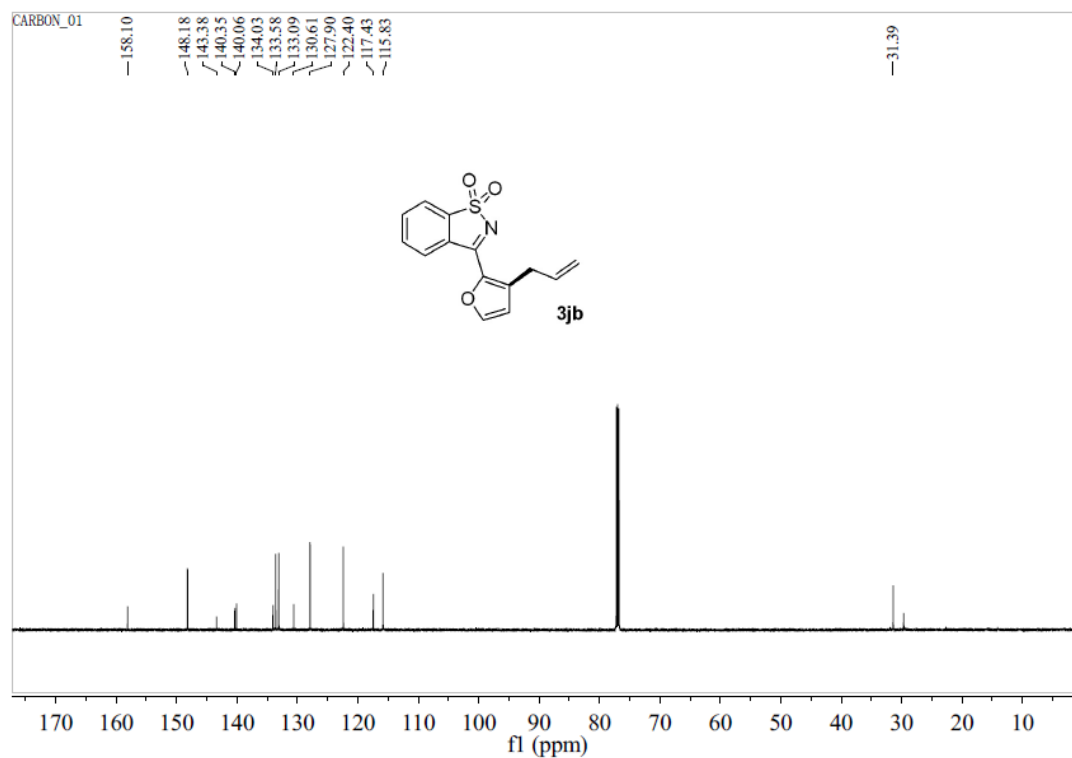

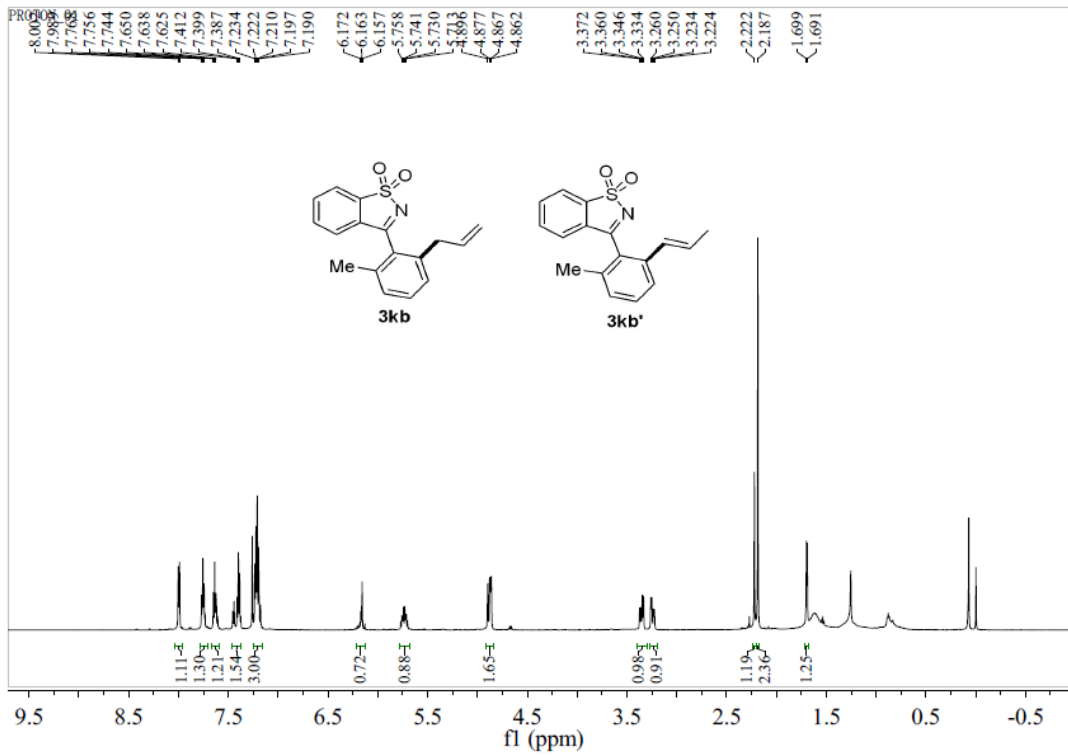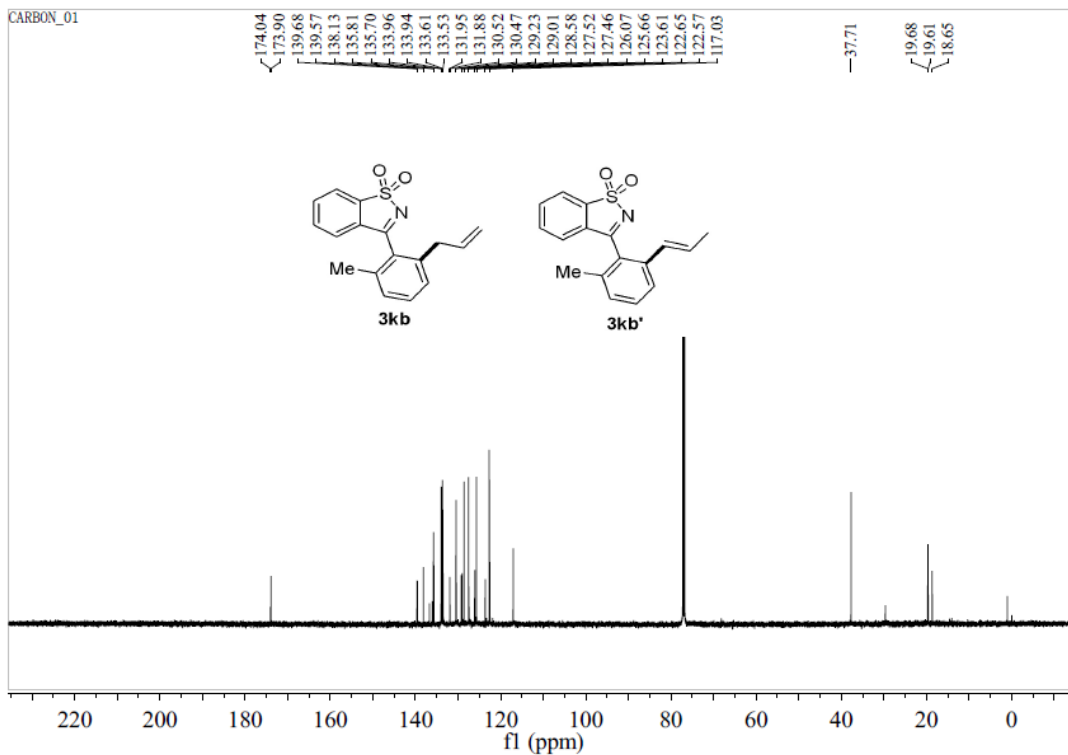

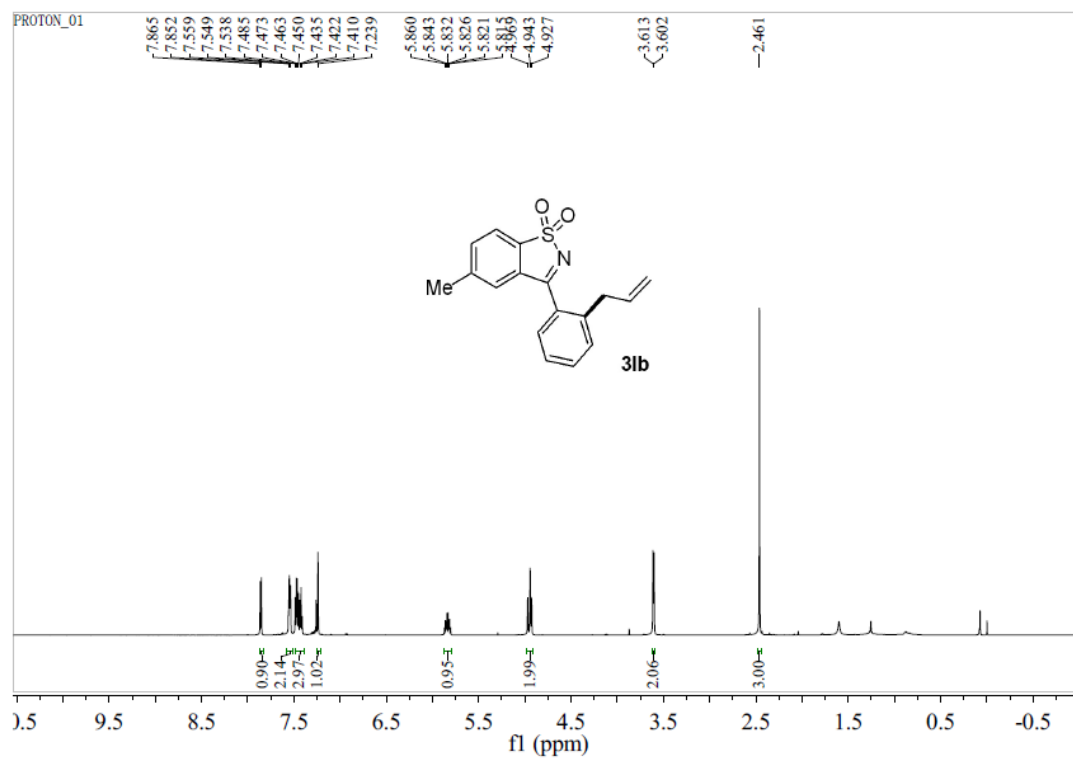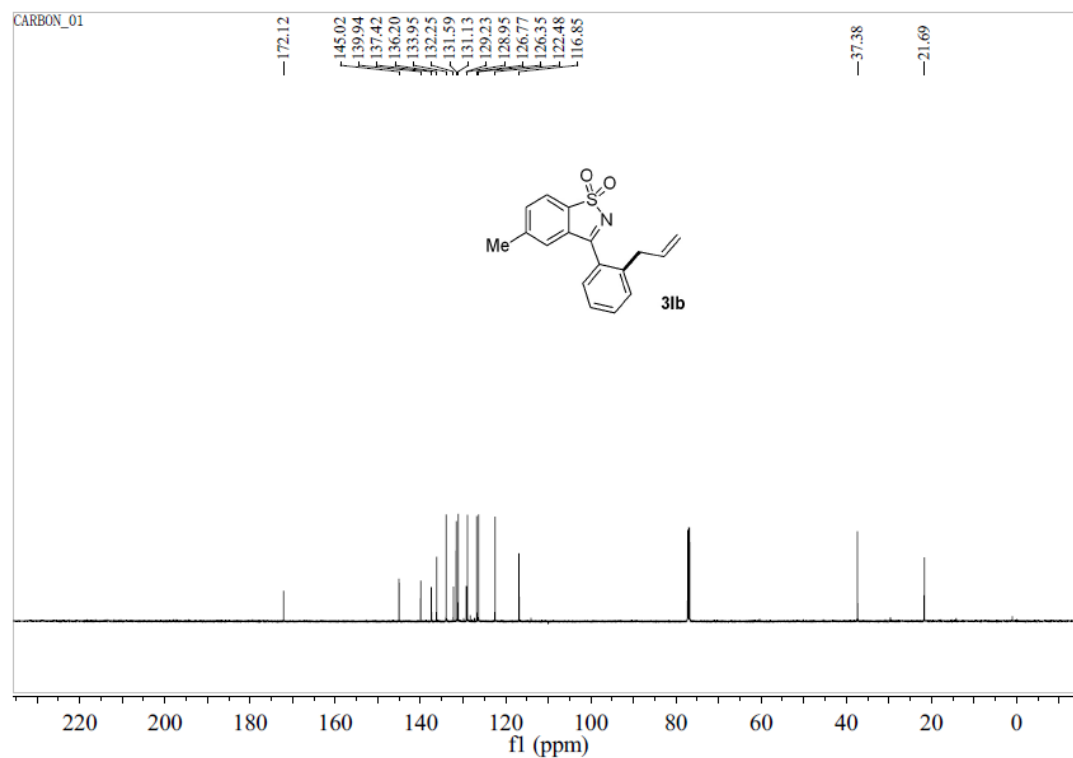

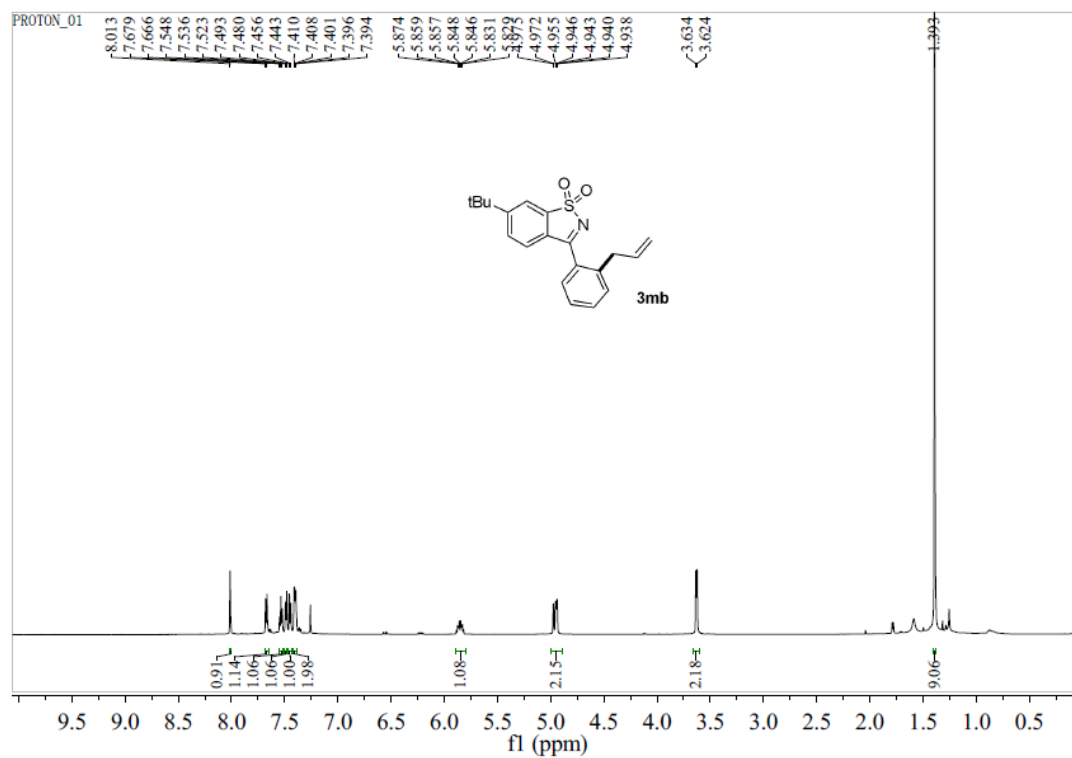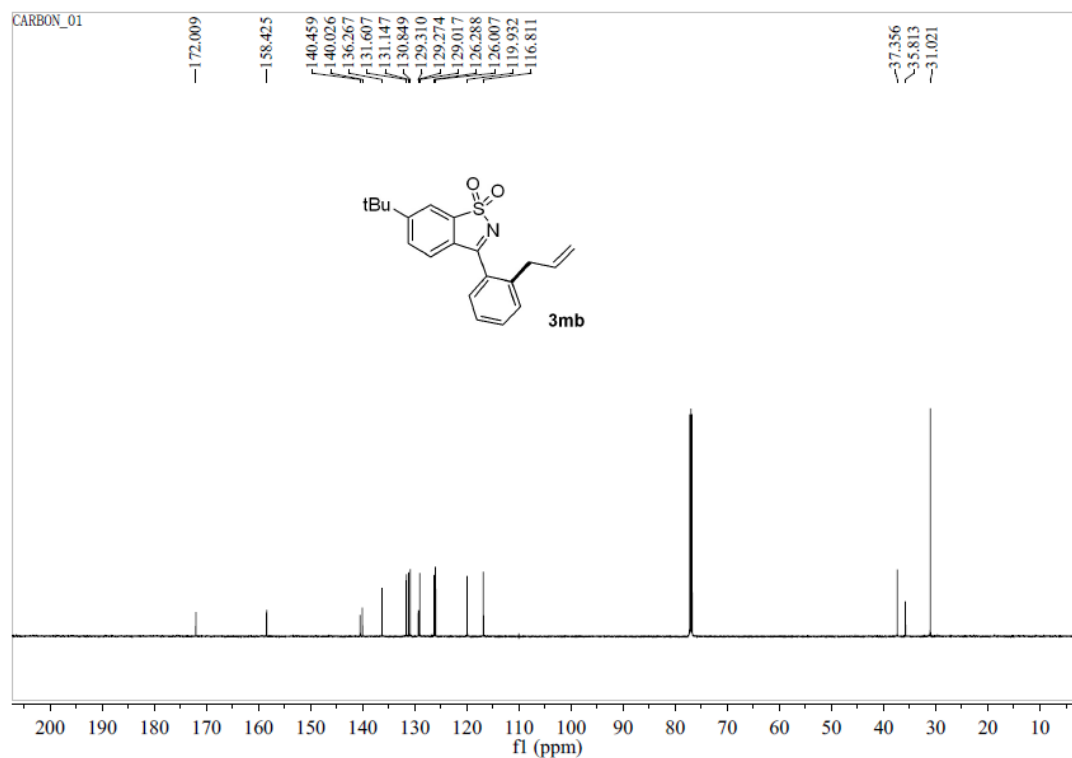

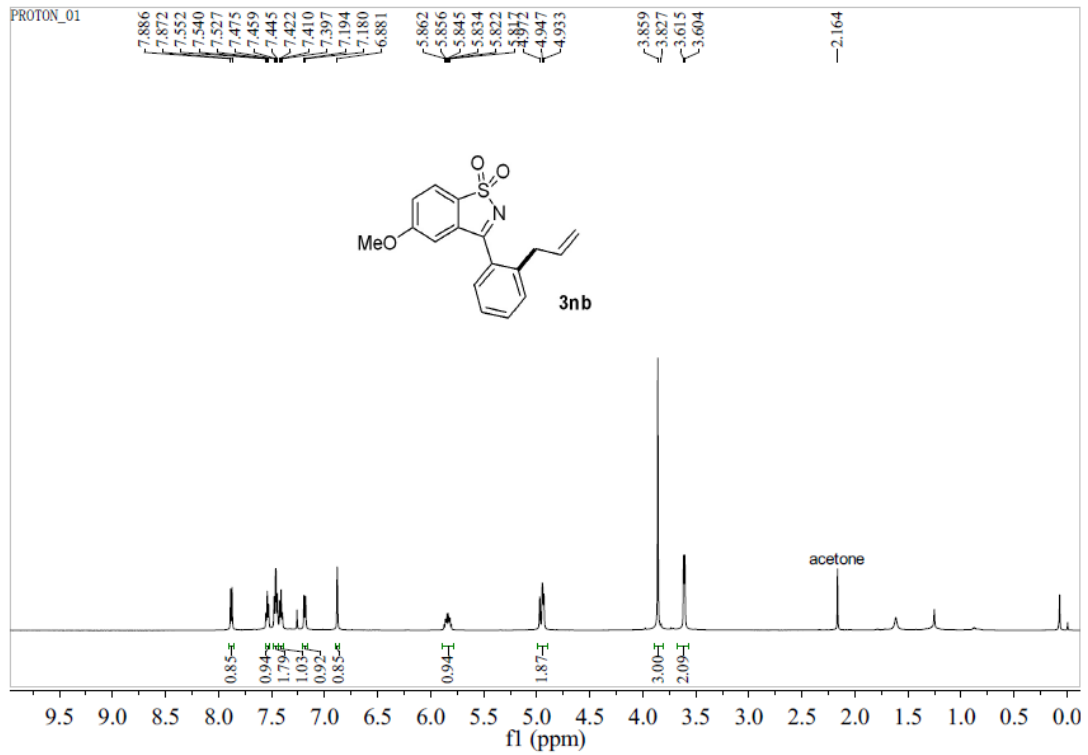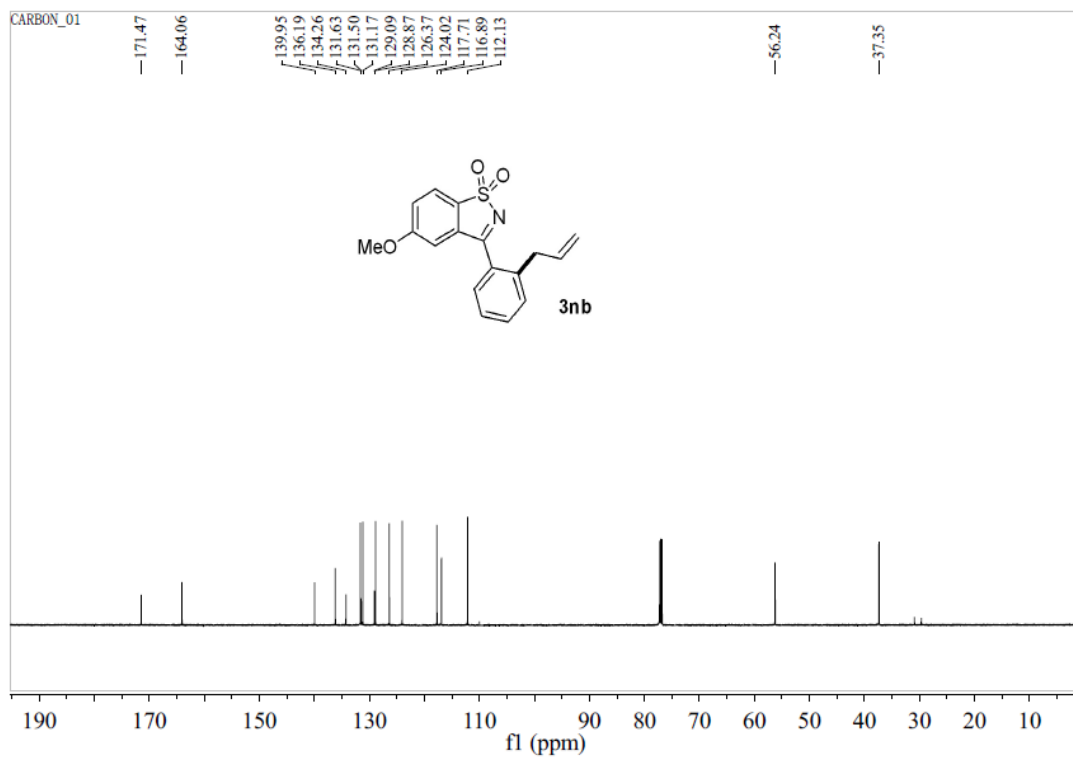



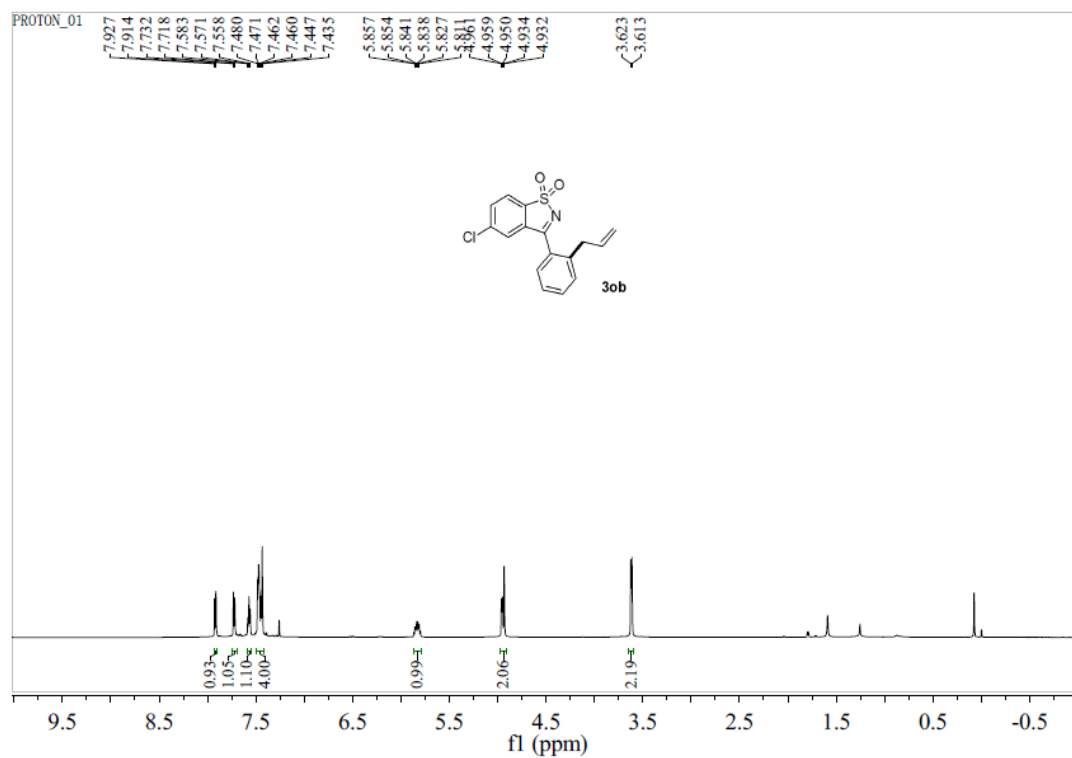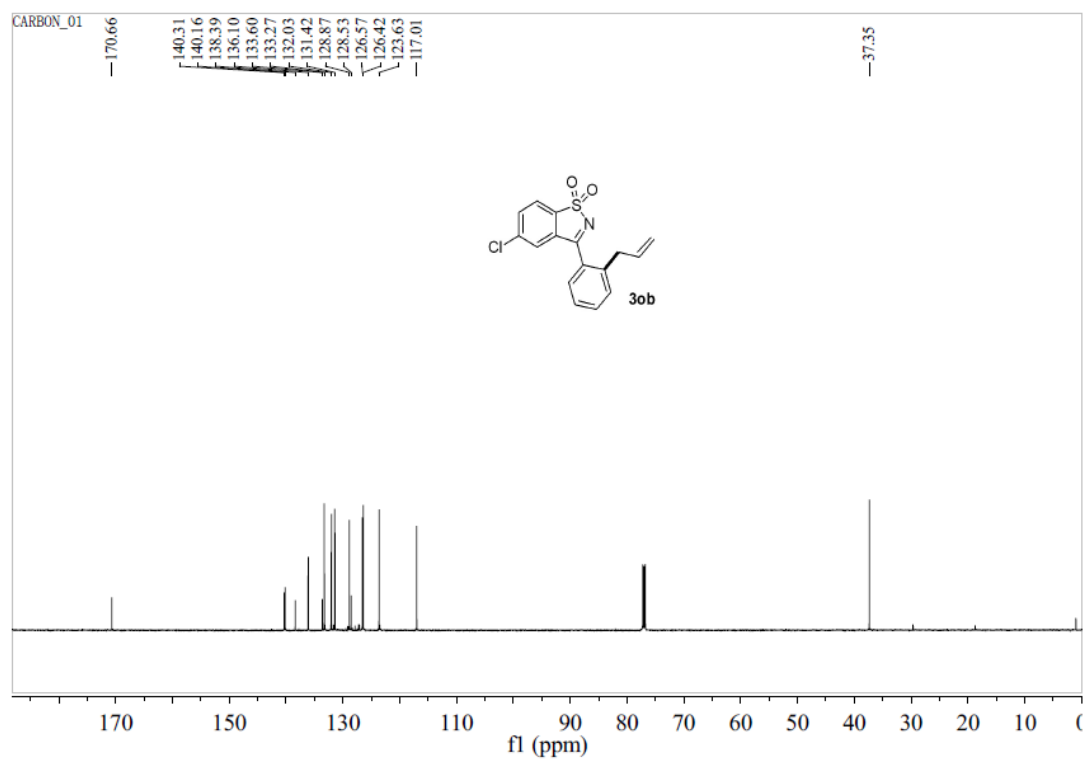

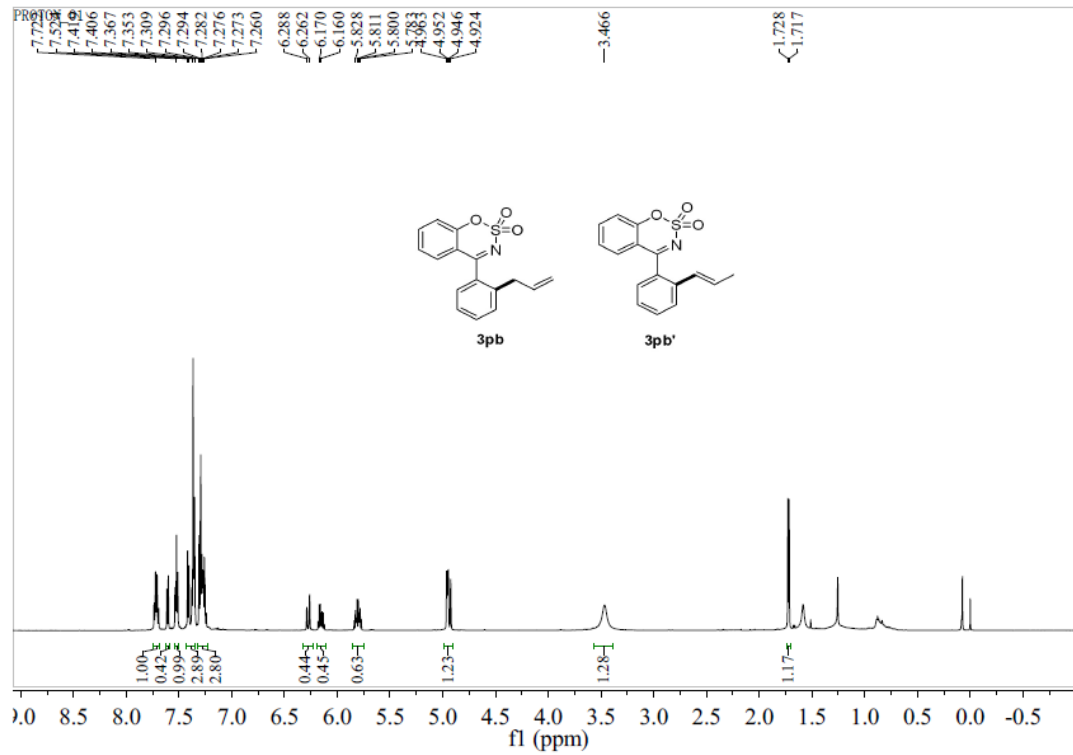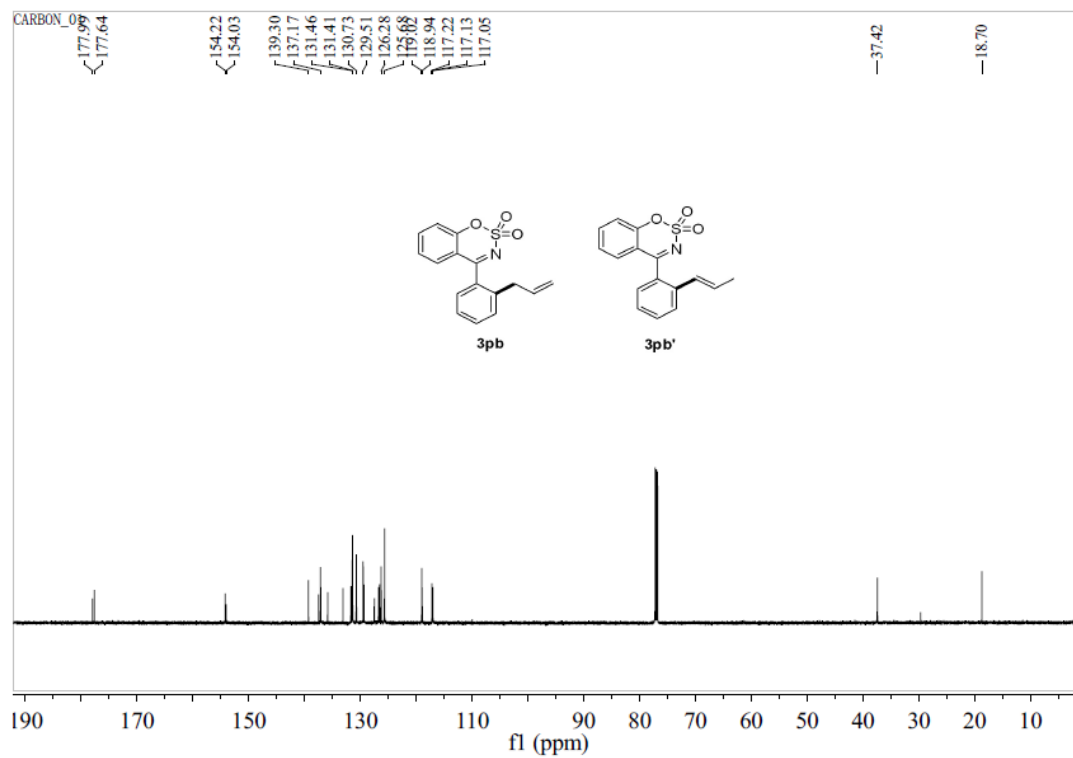

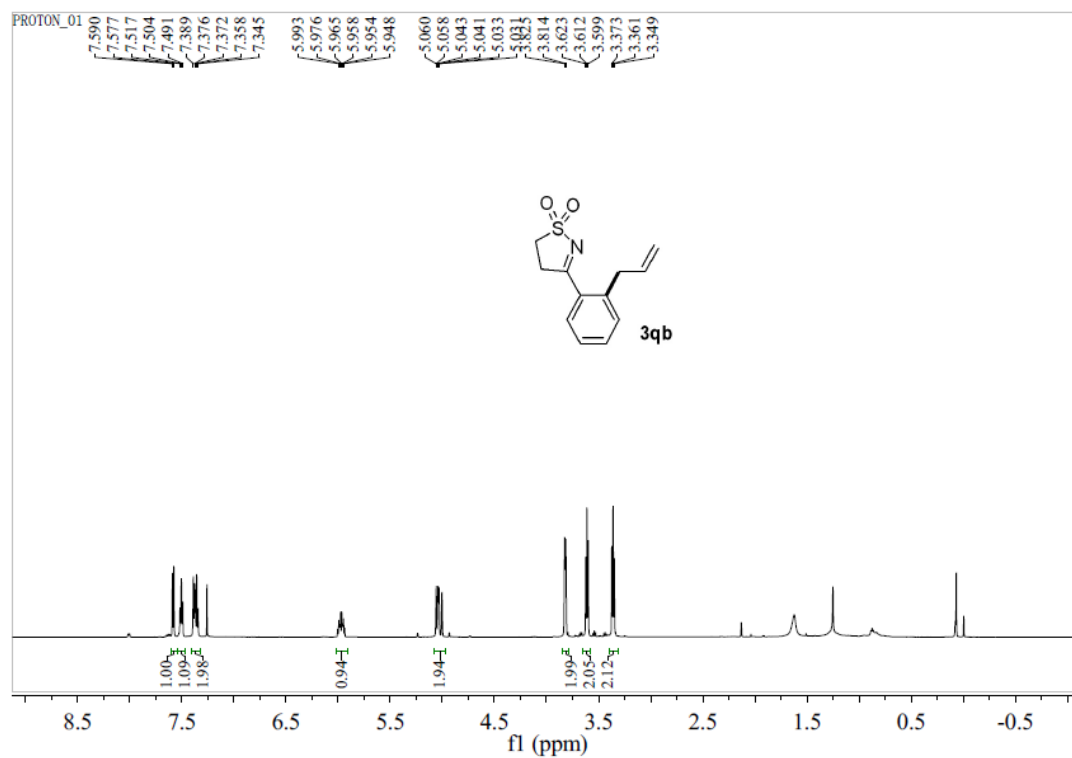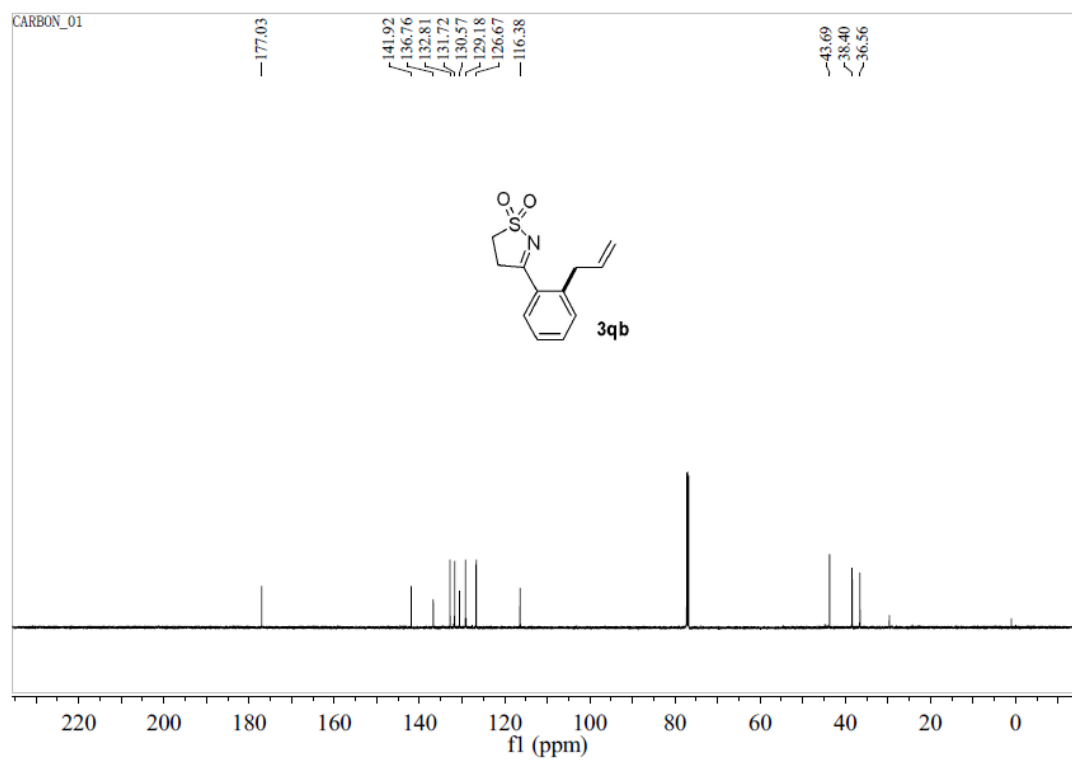

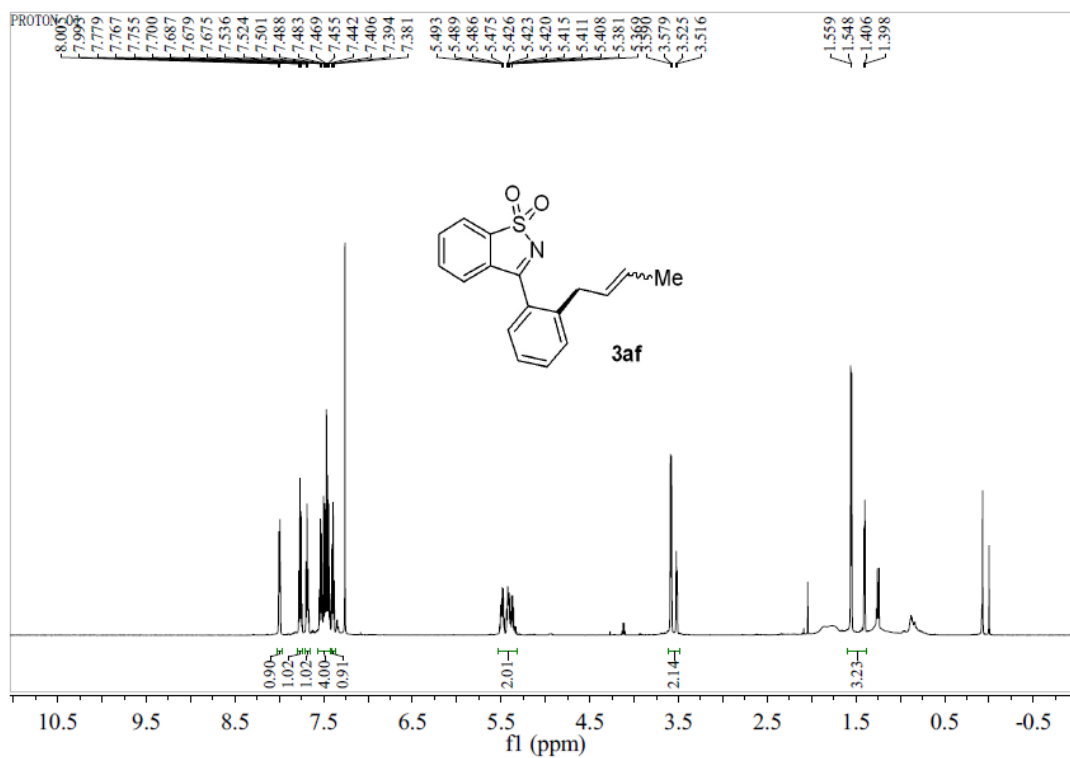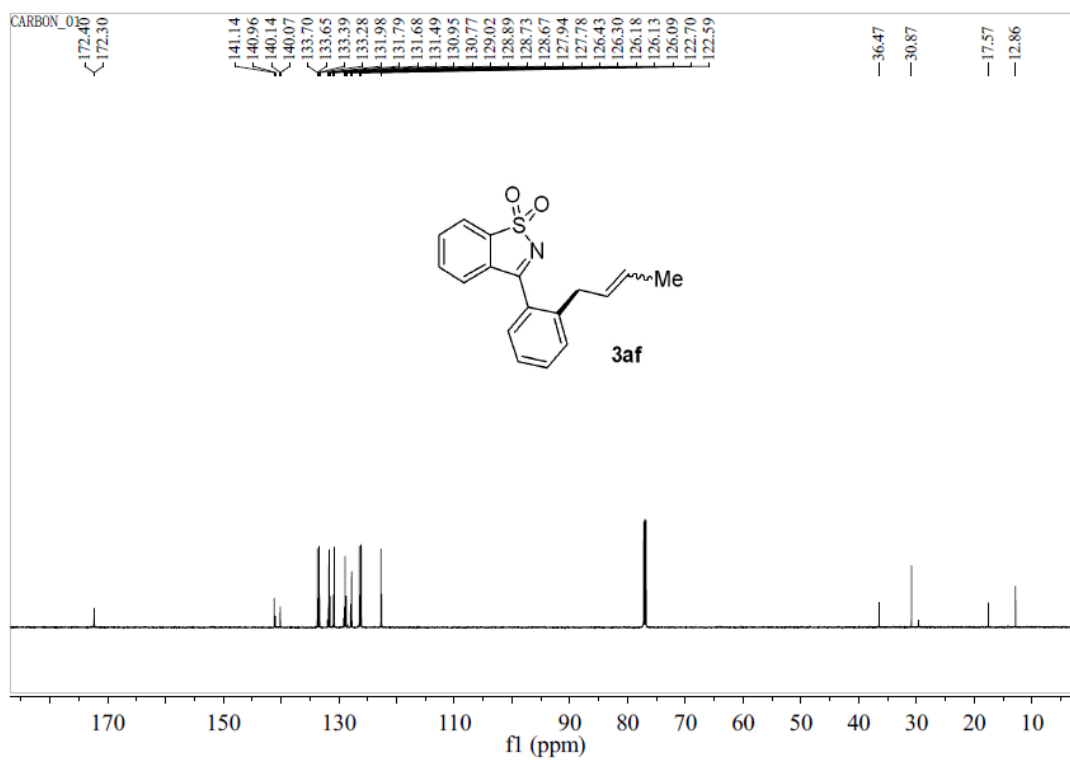

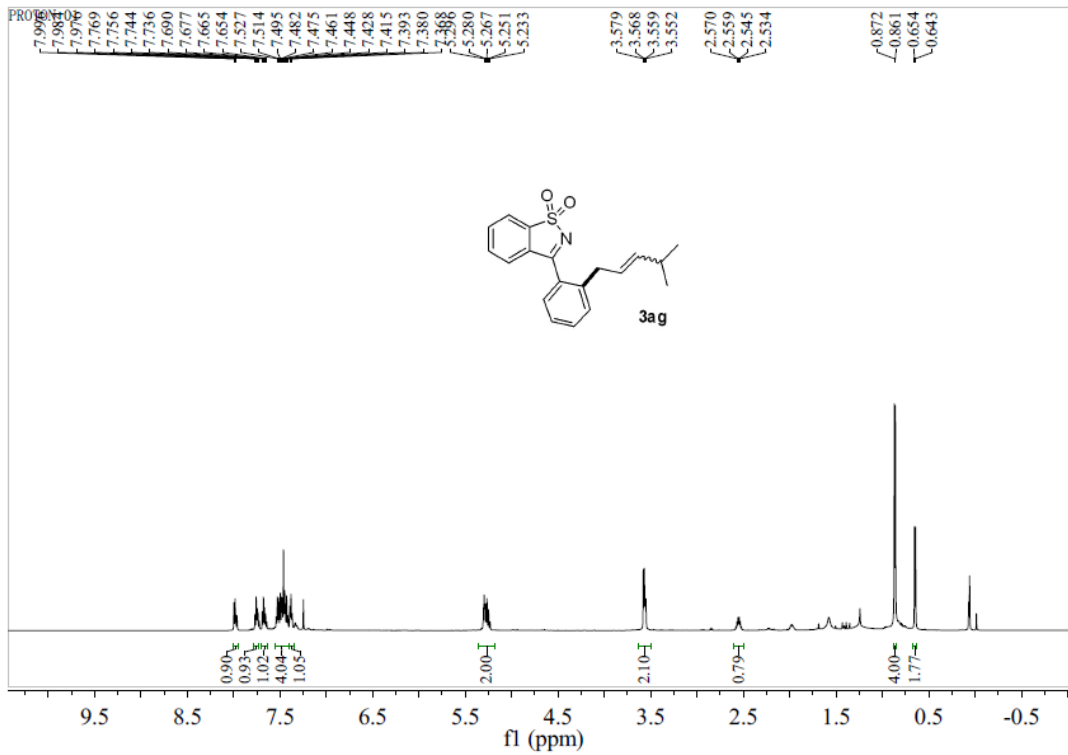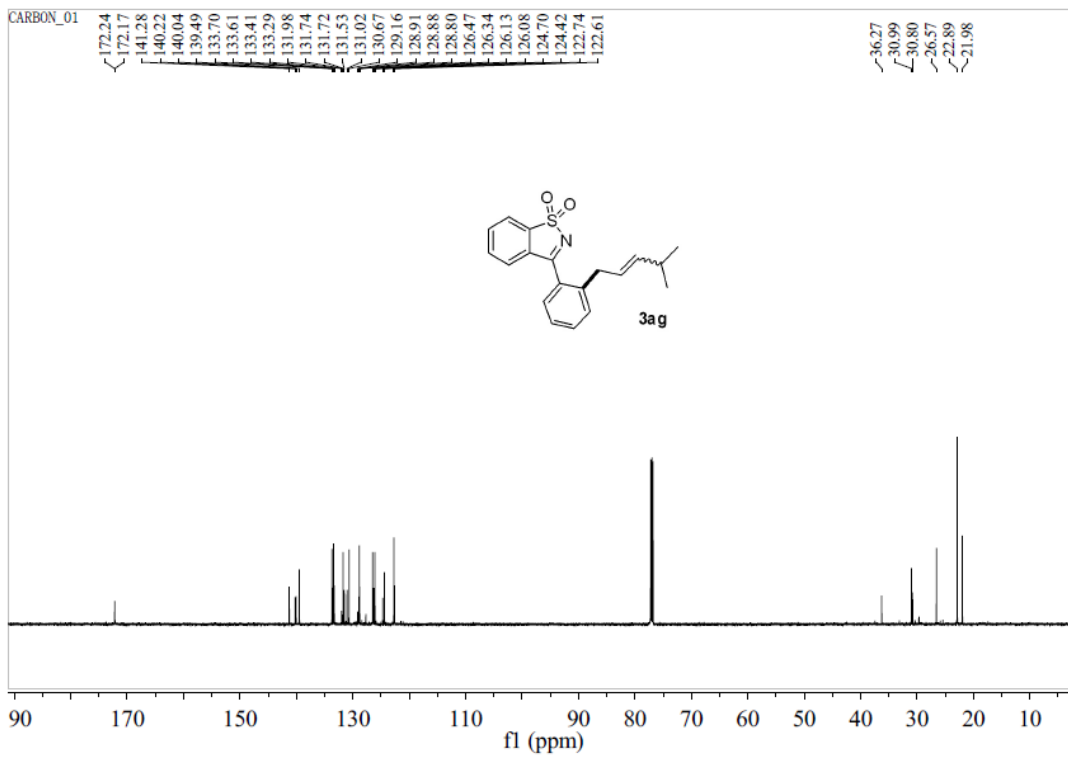

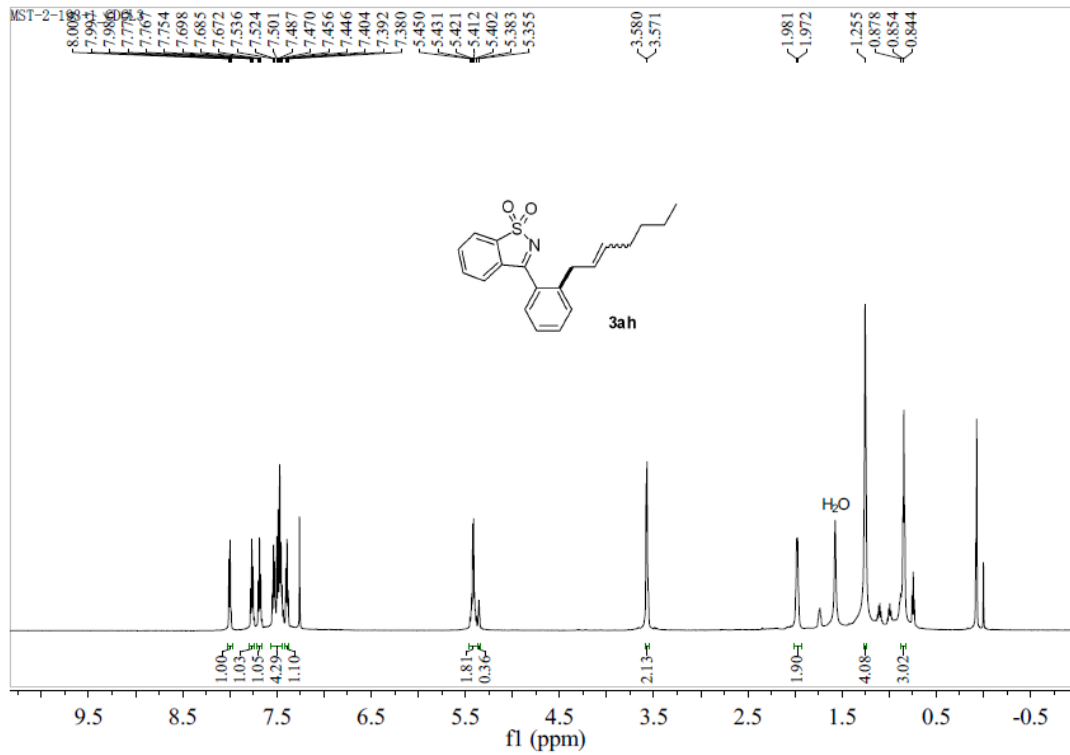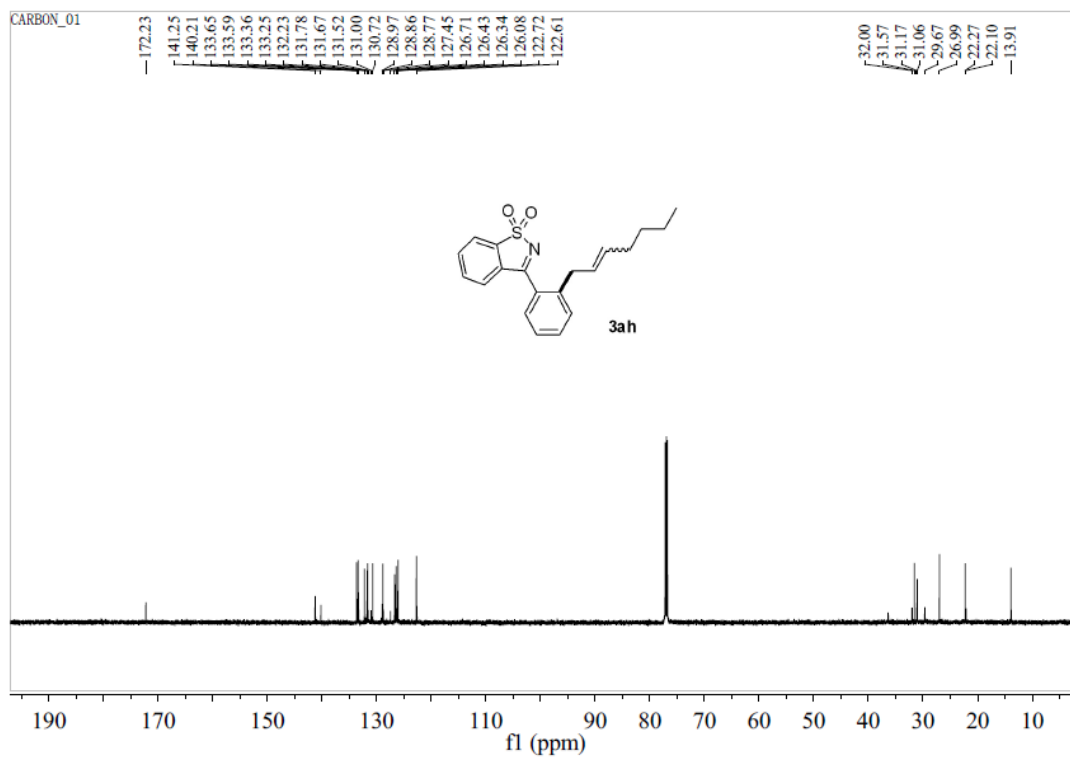

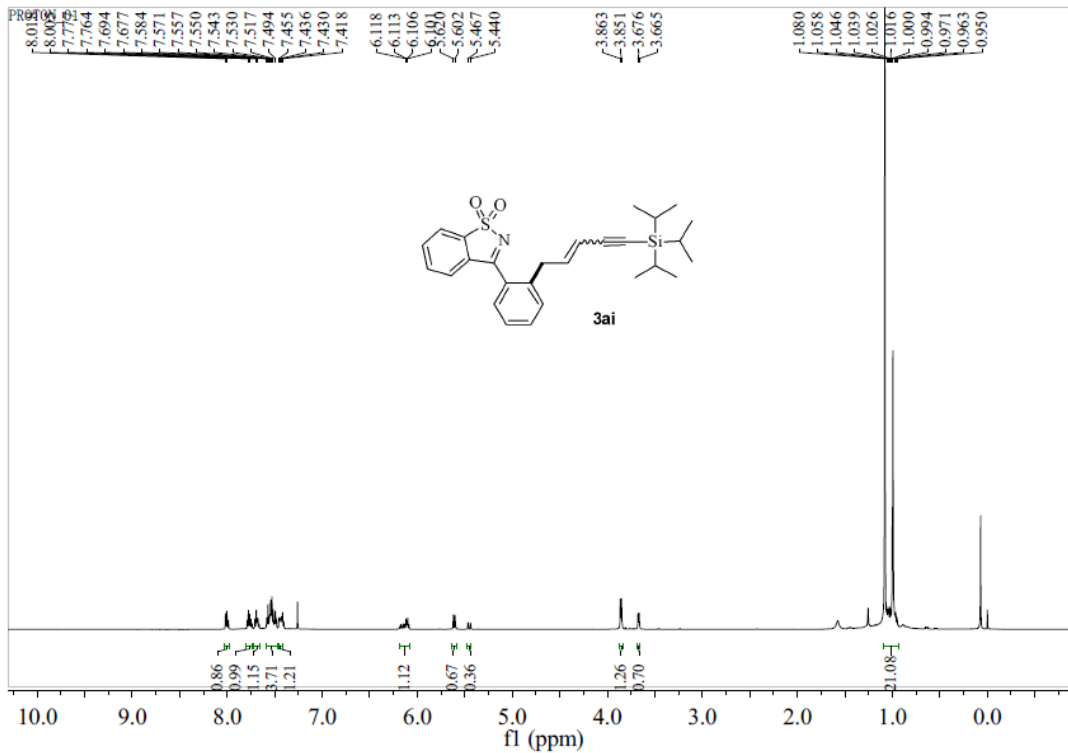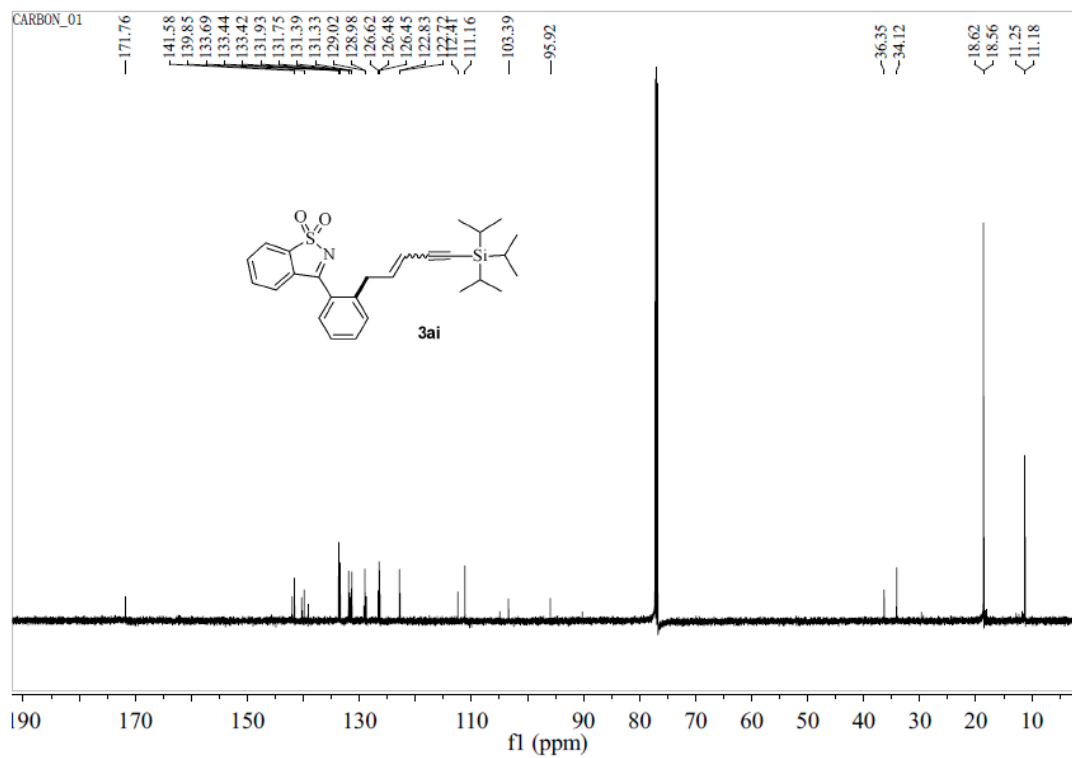

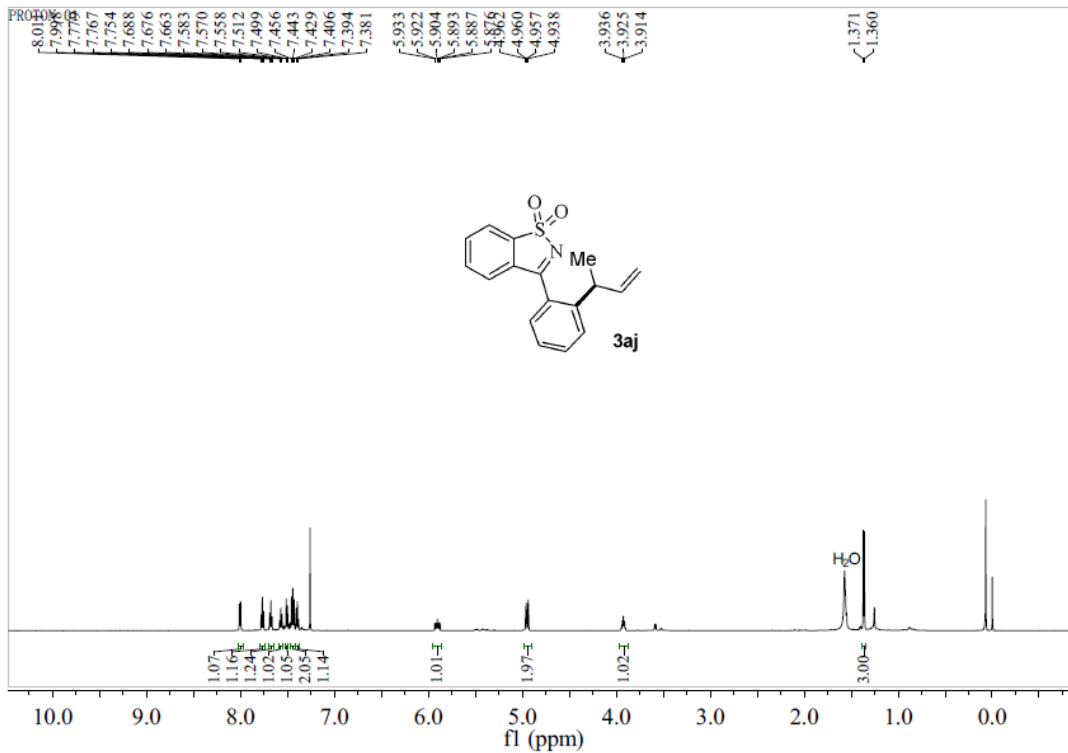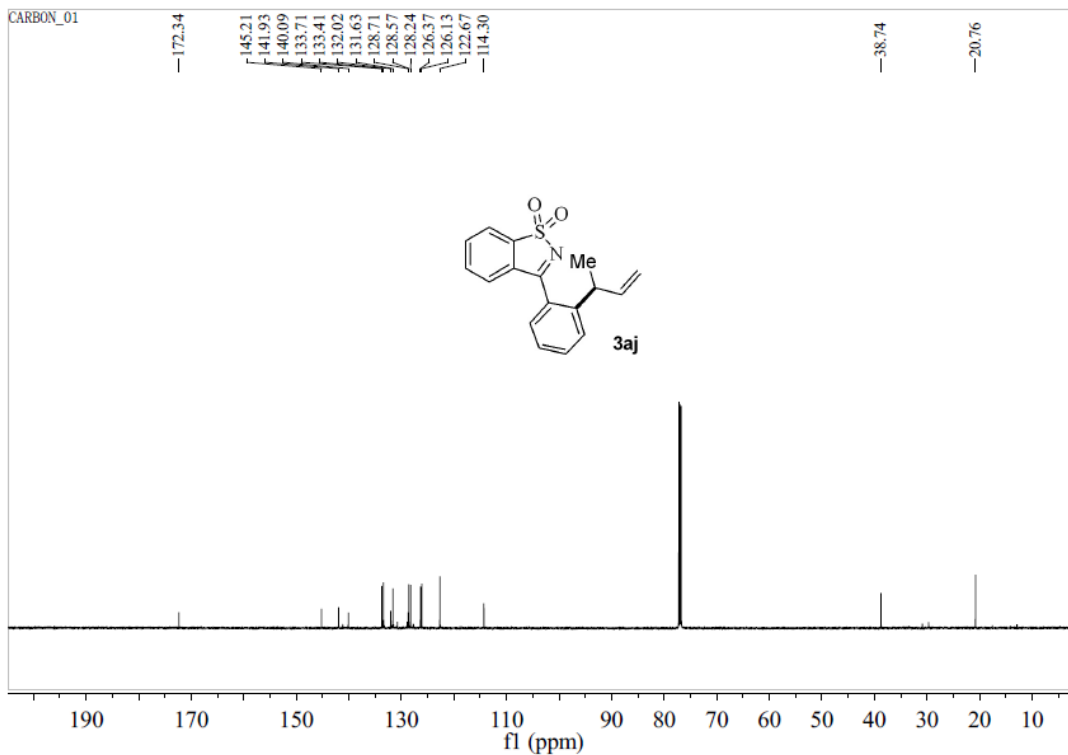



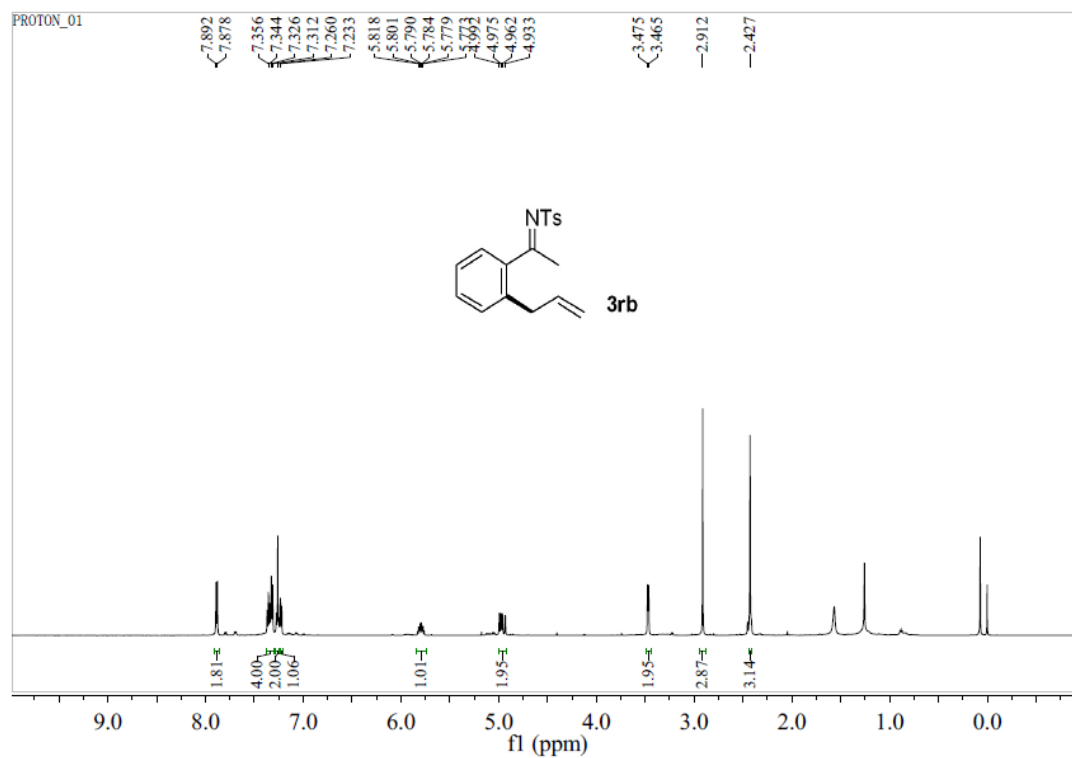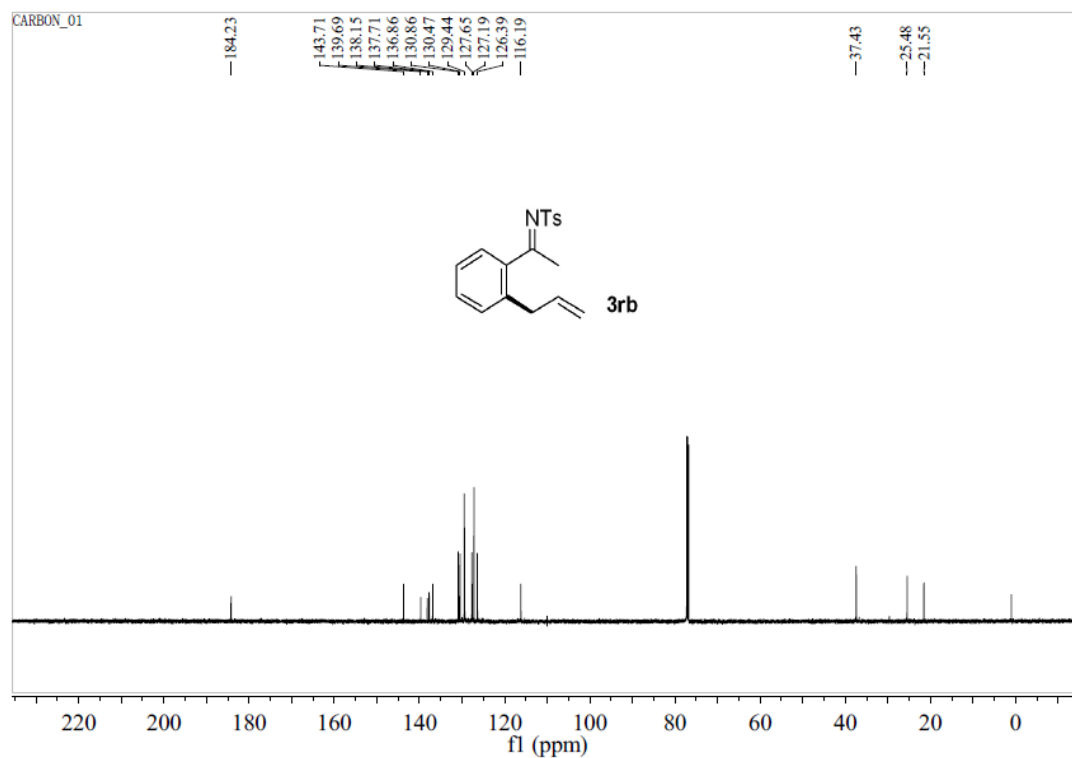

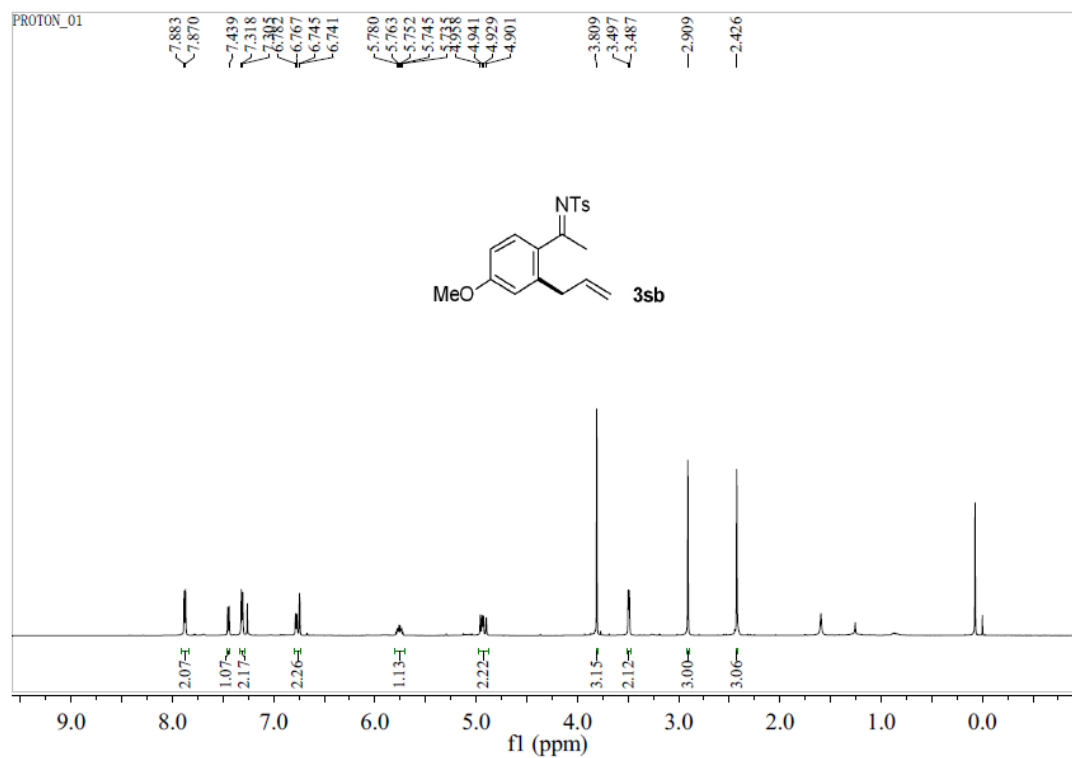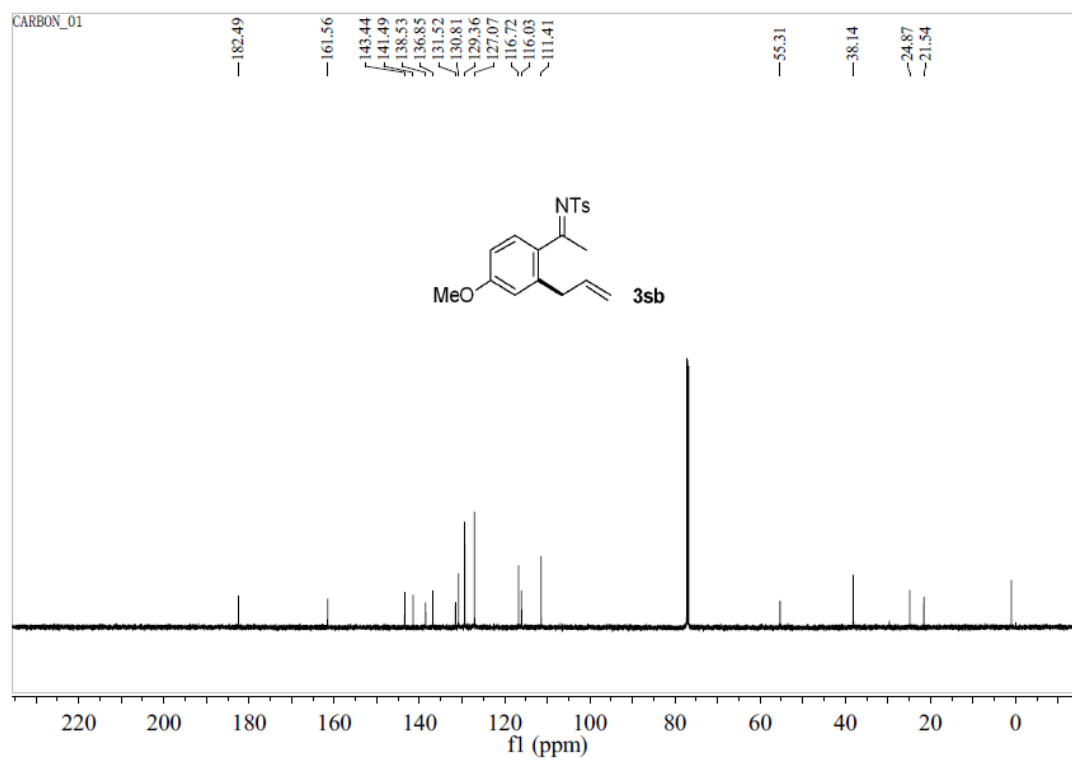

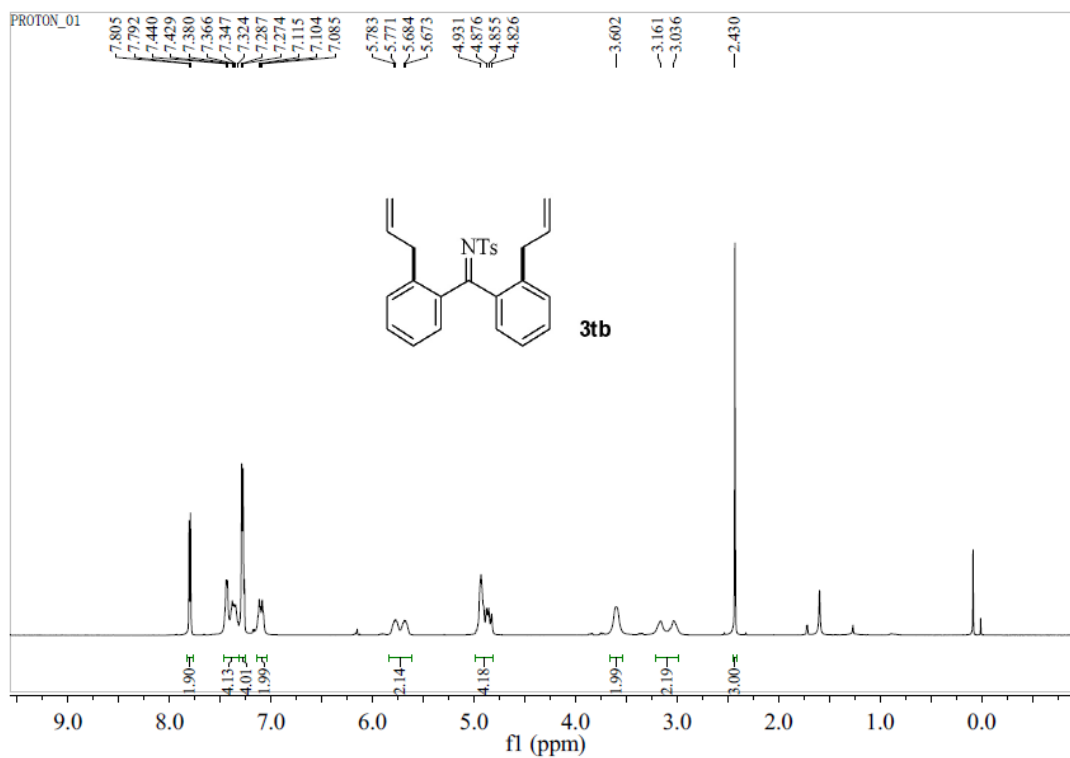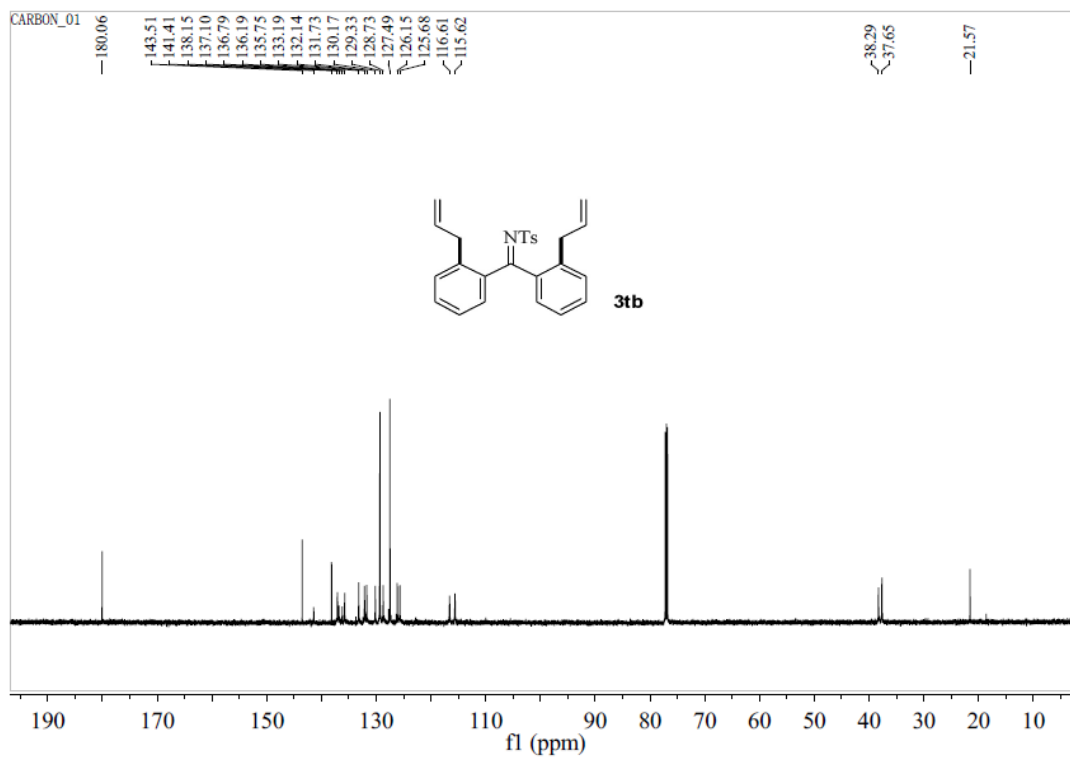

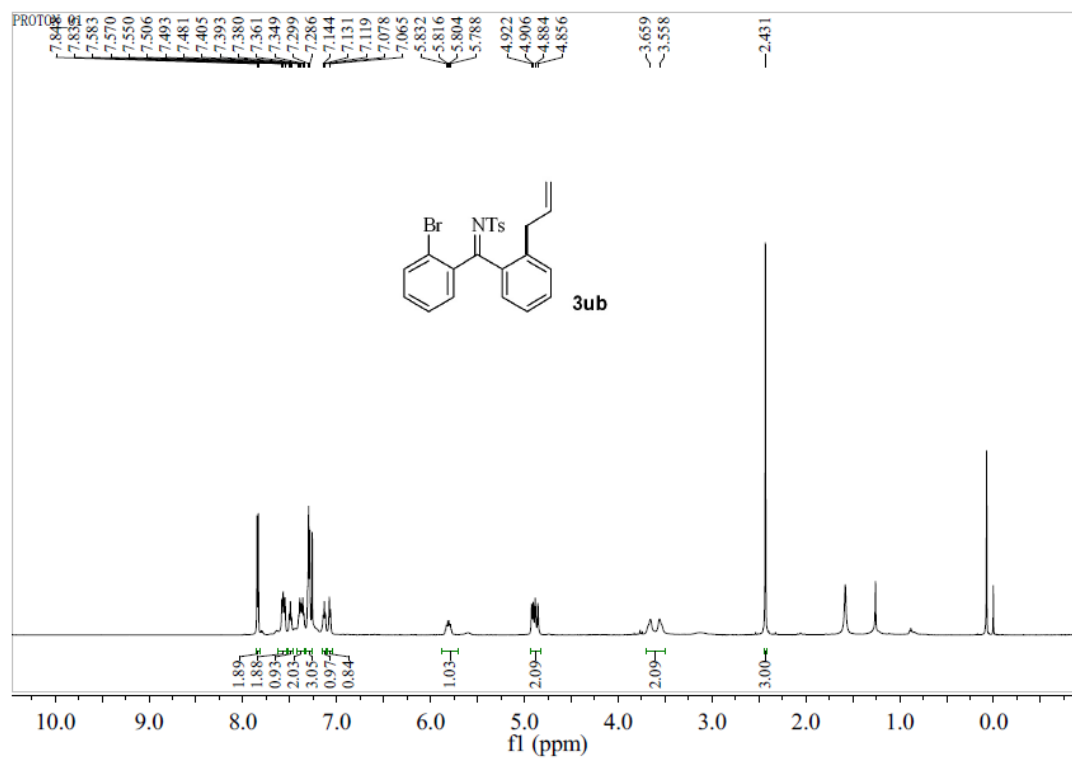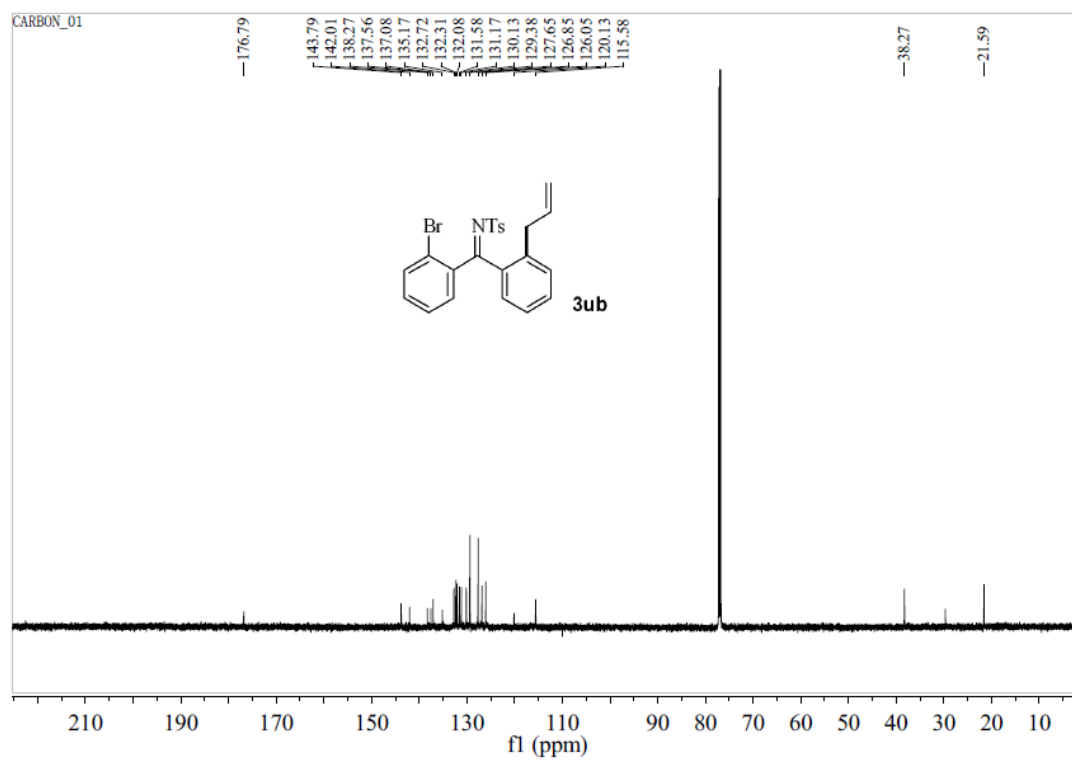

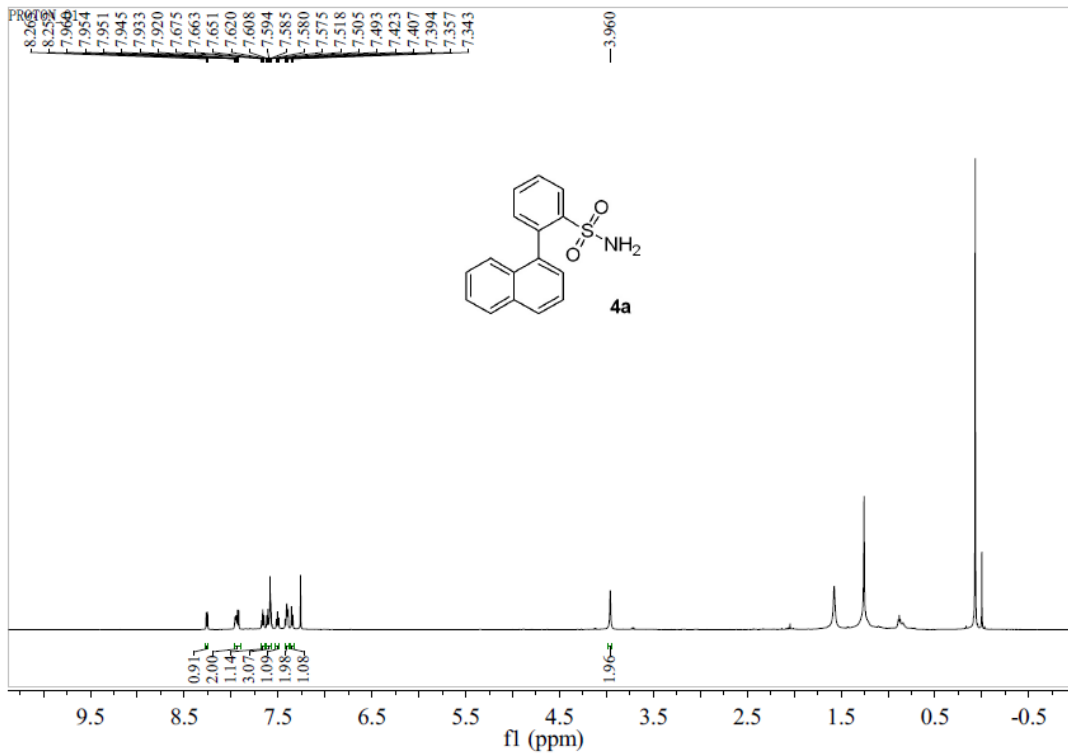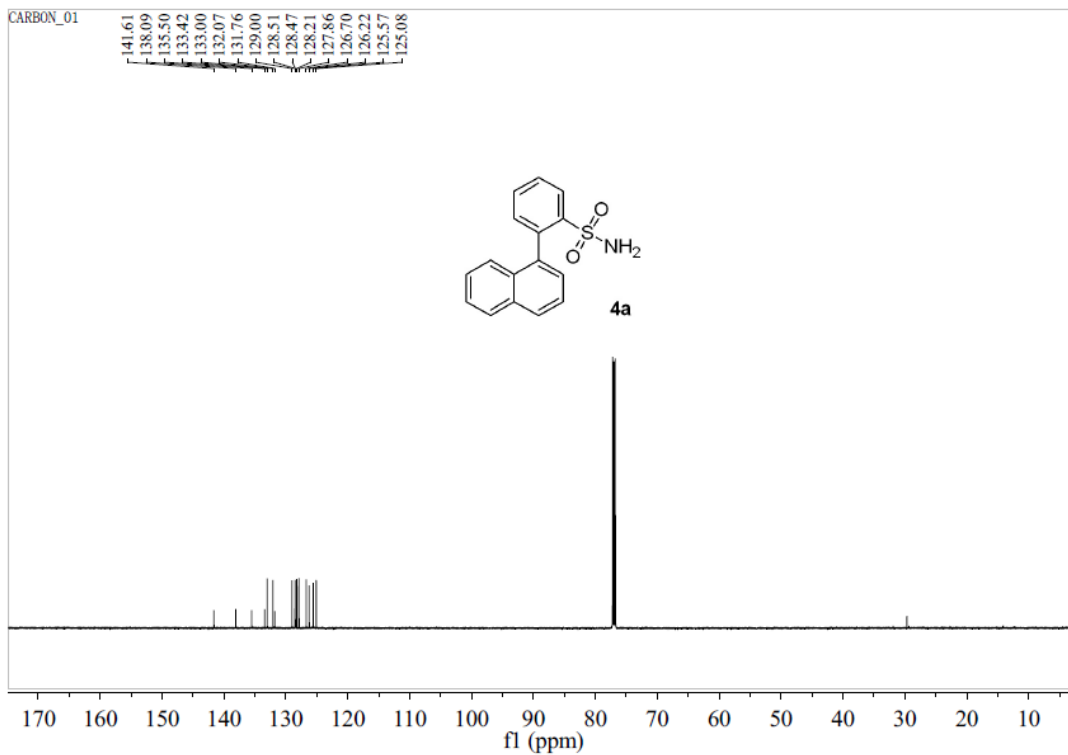

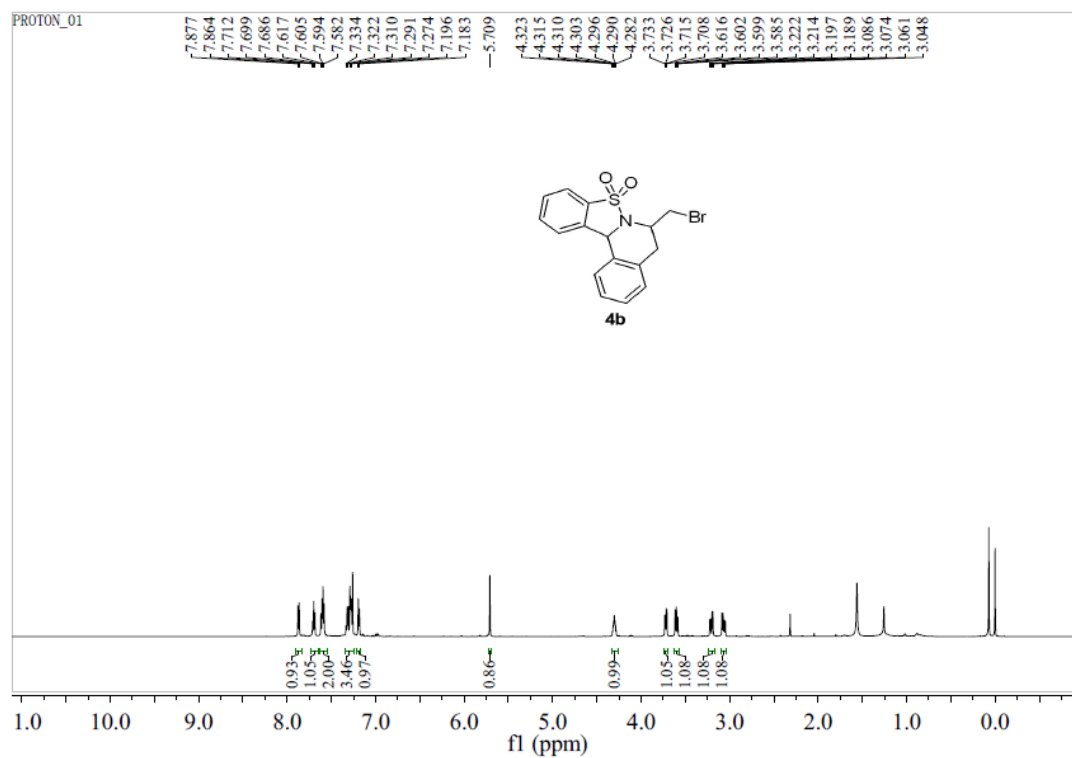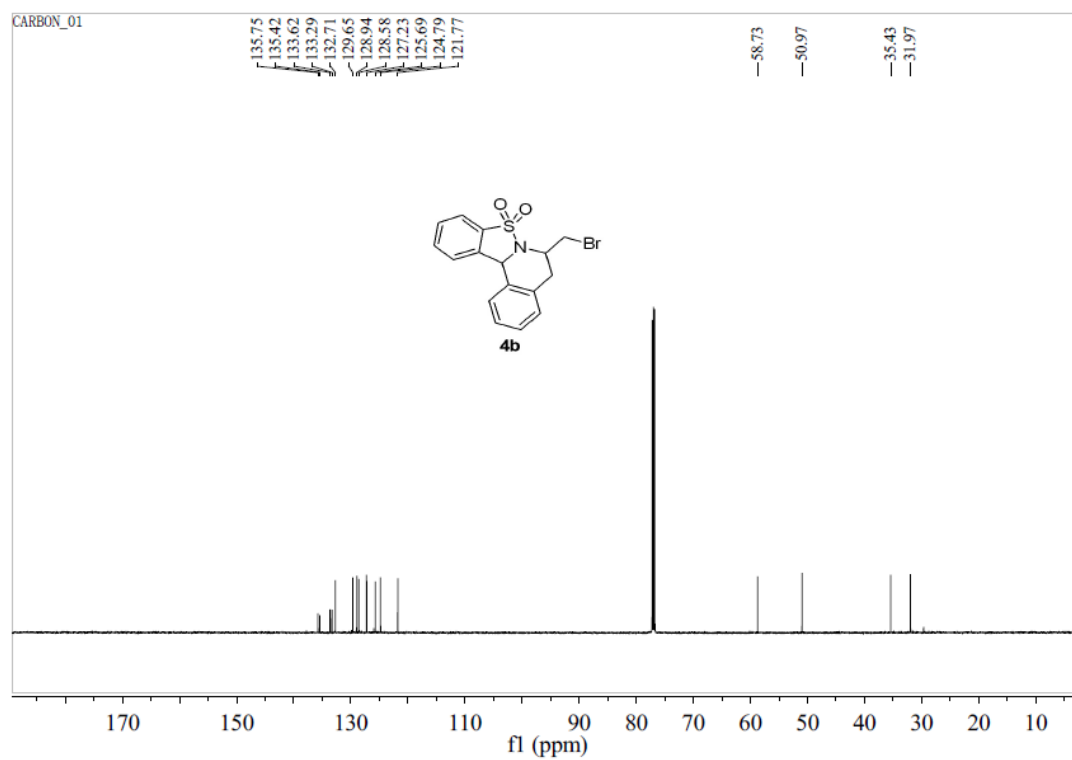

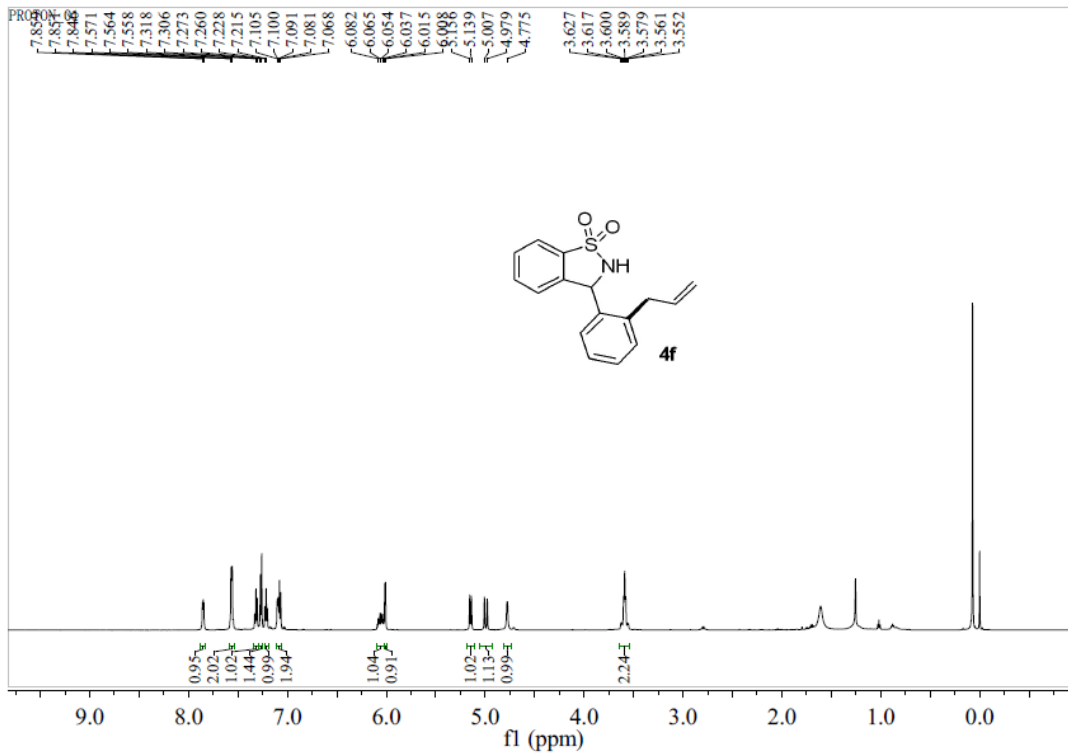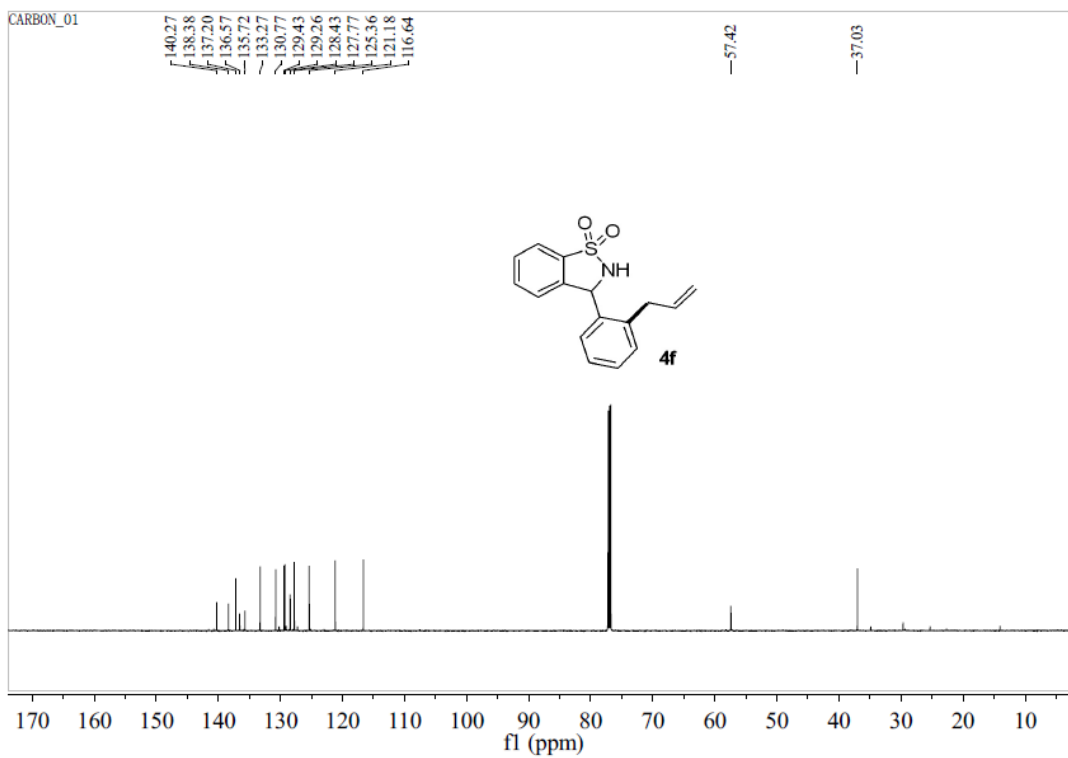

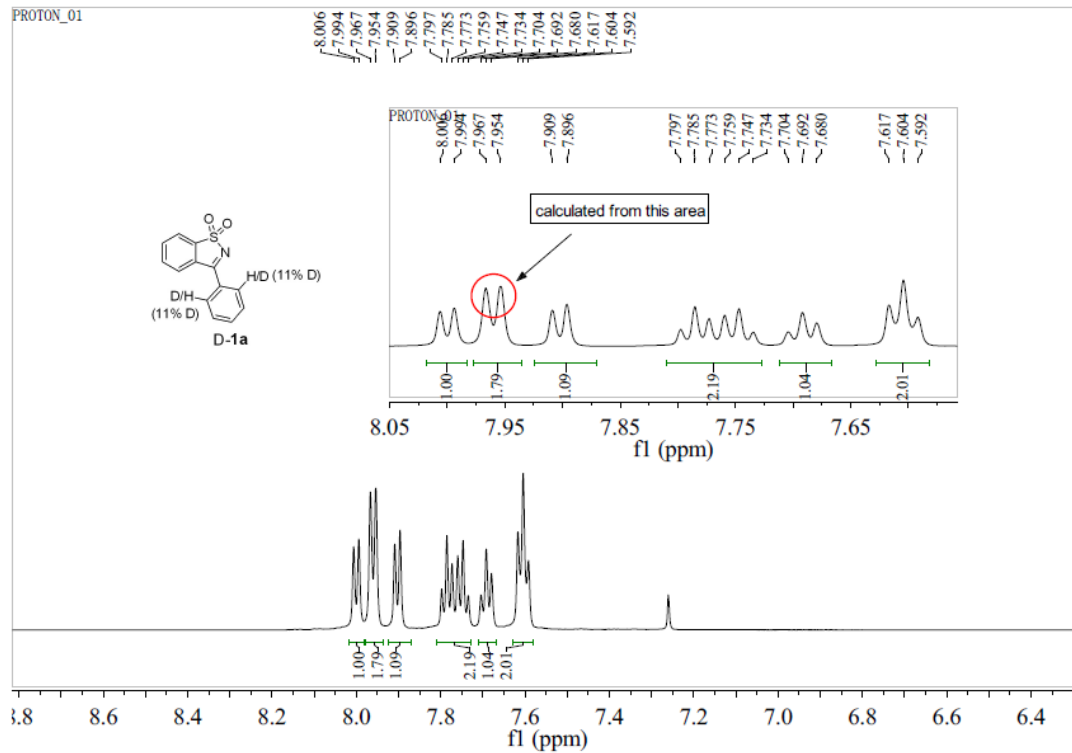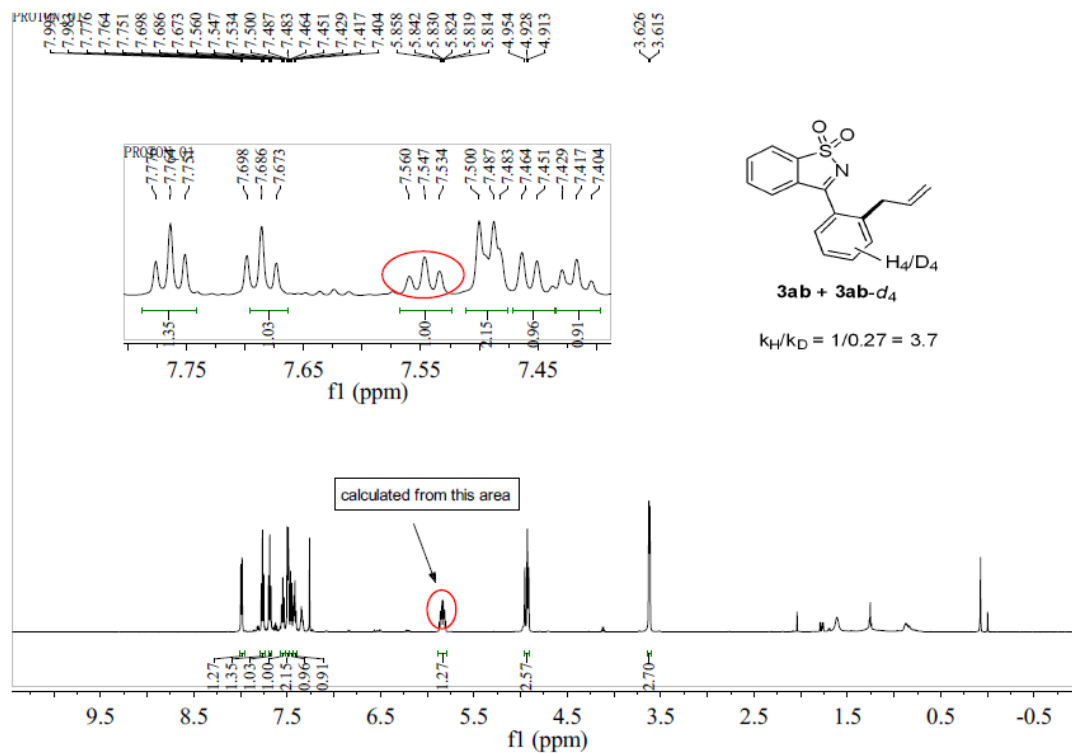

Supplement: c4cc09899d1.pdf [file c4cc09899d1.pdf]
